# Supplementary material for: One-Pot Synthesis of Phosphinylphosphonate Derivatives and Their Anti-Tumor Evaluations
Source: MDPI journal article supplement (doi:10.3390/molecules26247609), 2021-12-15

# One-pot Synthesis of Phosphinylphosphonate Derivatives and Their Anti-tumor Evaluations

Jade Dussart-Gautheret, Julia Deschamp, Thibaut Legigan, Maelle Monteil,  
Evelyne Migianu-Griffoni,\* and Marc Lecouvey\*

Université Sorbonne Paris Nord, CSPBAT, CNRS, UMR 7244,  
1 rue de Chablis F-93000 Bobigny, France

## *Supporting Information*

NMR DATA OF 1-HYDROXYMETHYLENE-1,1-(*H*-PHOSPHINYLPHOSPHONATES) 6A-P AND 14O-P ..... 2

# NMR data of 1-hydroxymethylene-1,1-(*H*-phosphinylphosphonates) 6a-p and 14o-p

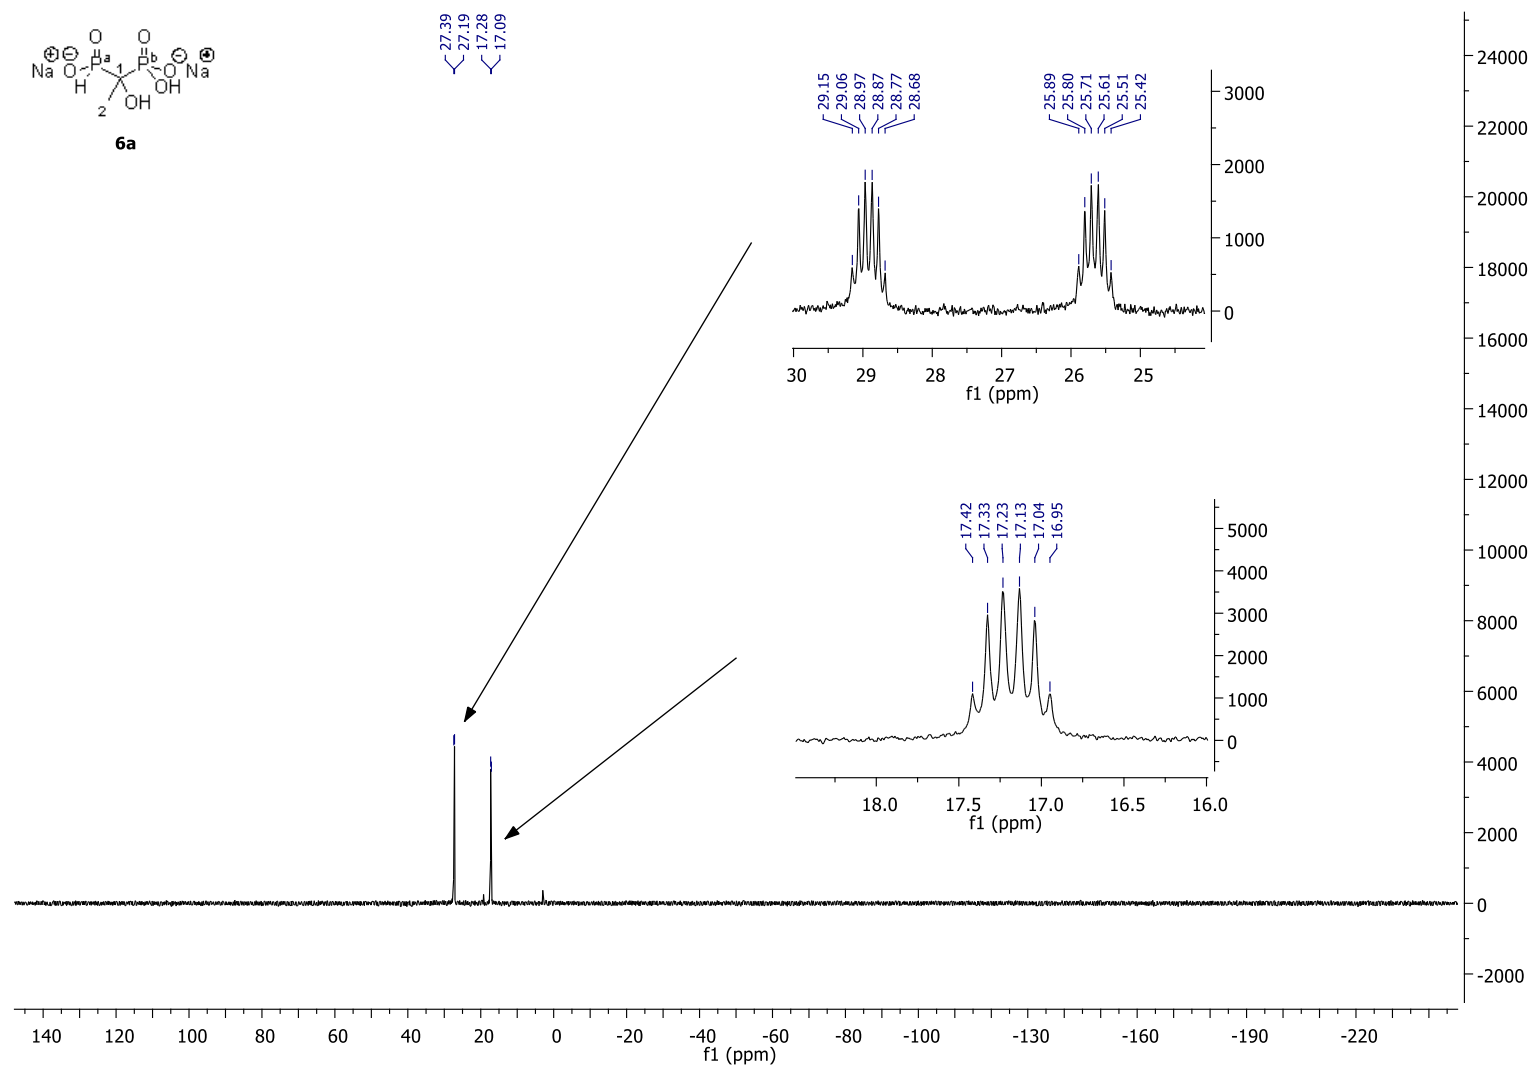

Figure S1: <sup>31</sup>P{<sup>1</sup>H} and <sup>31</sup>P NMR (162 MHz, D<sub>2</sub>O) spectra of 1-hydroxyethane-1,1-bis(*H*-phosphinylphosphonate) disodium salt 6a

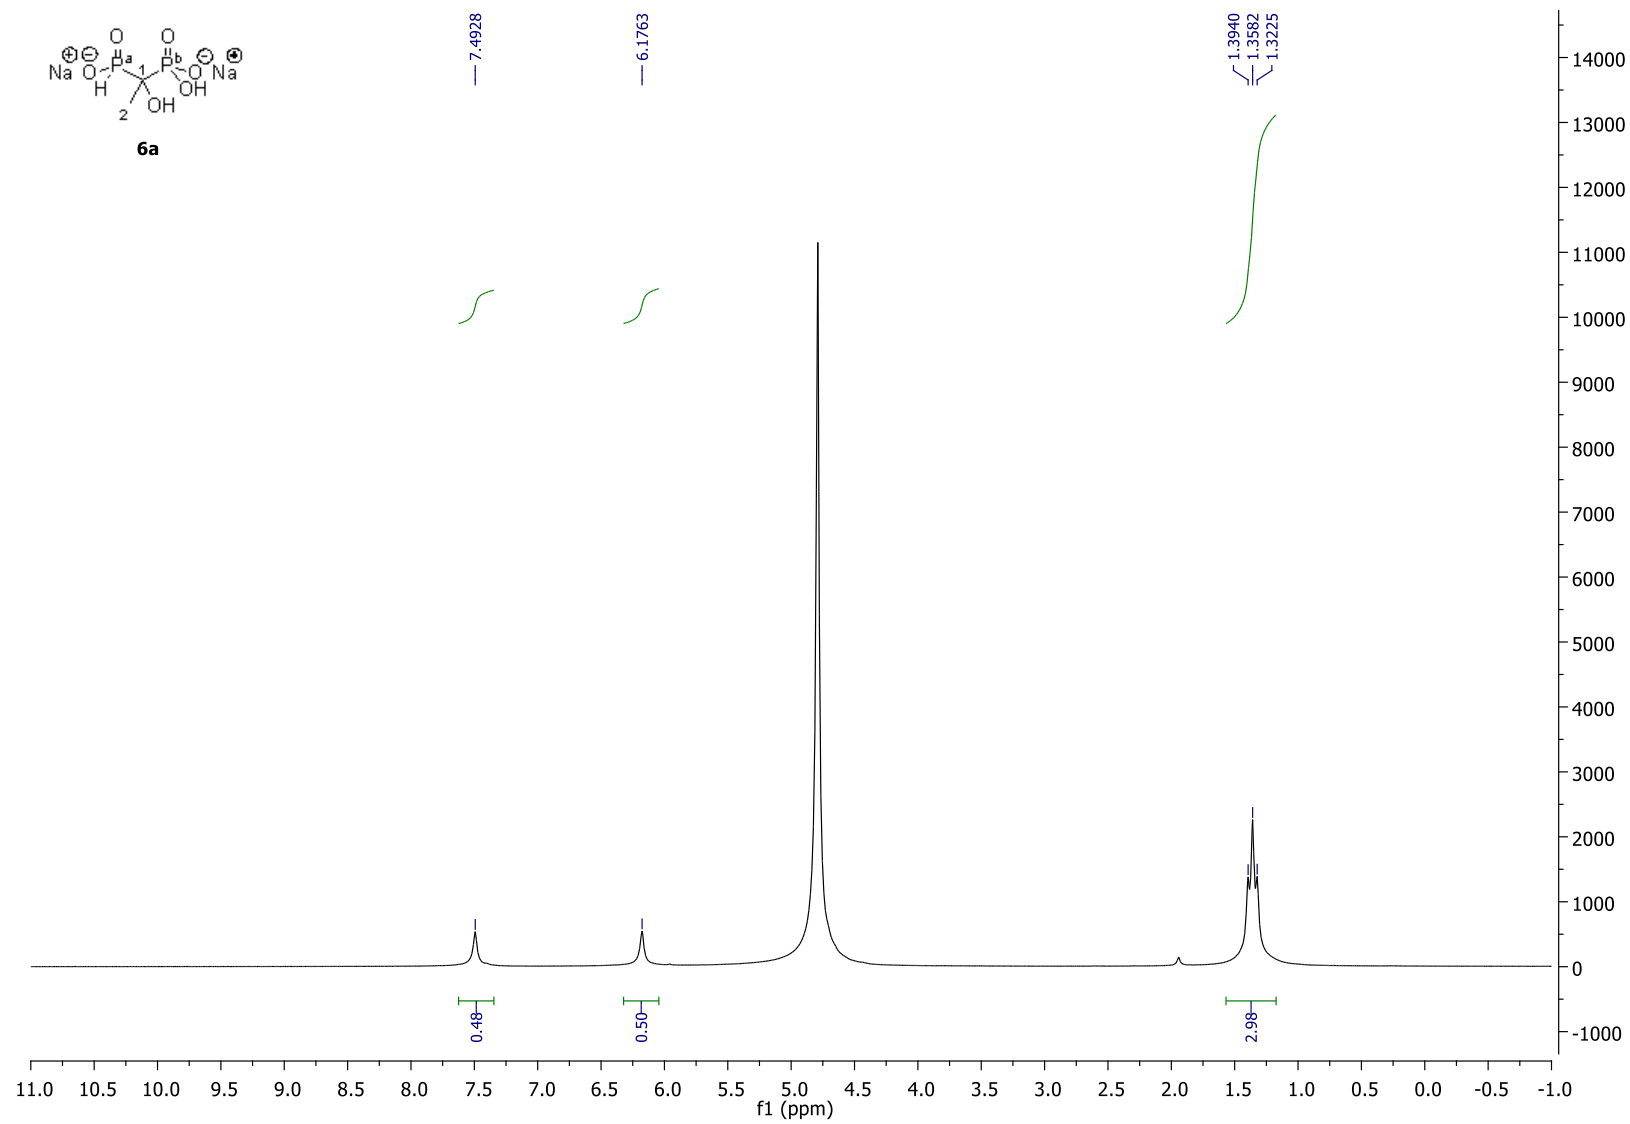

Figure S2:  $^1\text{H}$  NMR (400 MHz,  $\text{D}_2\text{O}$ ) spectrum of 1-hydroxyethane-1,1-bis(*H*-phosphinylphosphonate) disodium salt **6a**

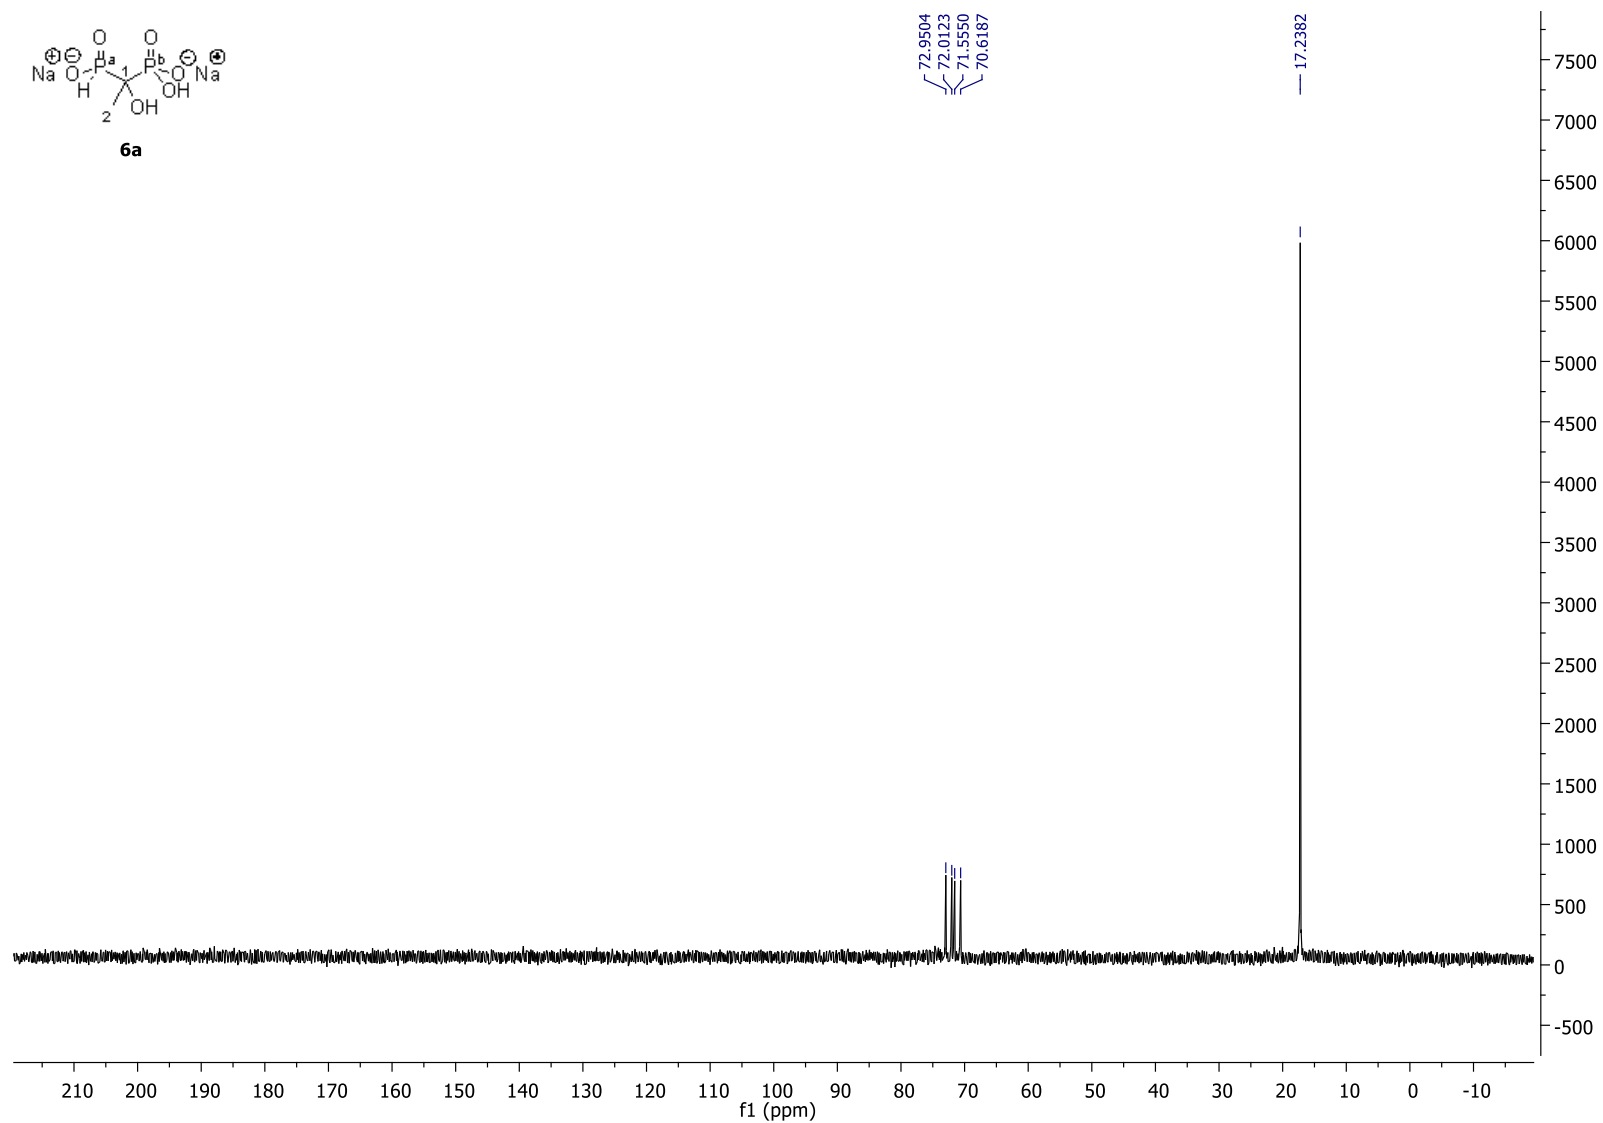

Figure S3:  $^{13}\text{C}$  NMR (101 MHz,  $\text{D}_2\text{O}$ ) spectrum of 1-hydroxyethane-1,1-bis(*H*-phosphinylphosphonate) disodium salt **6a**

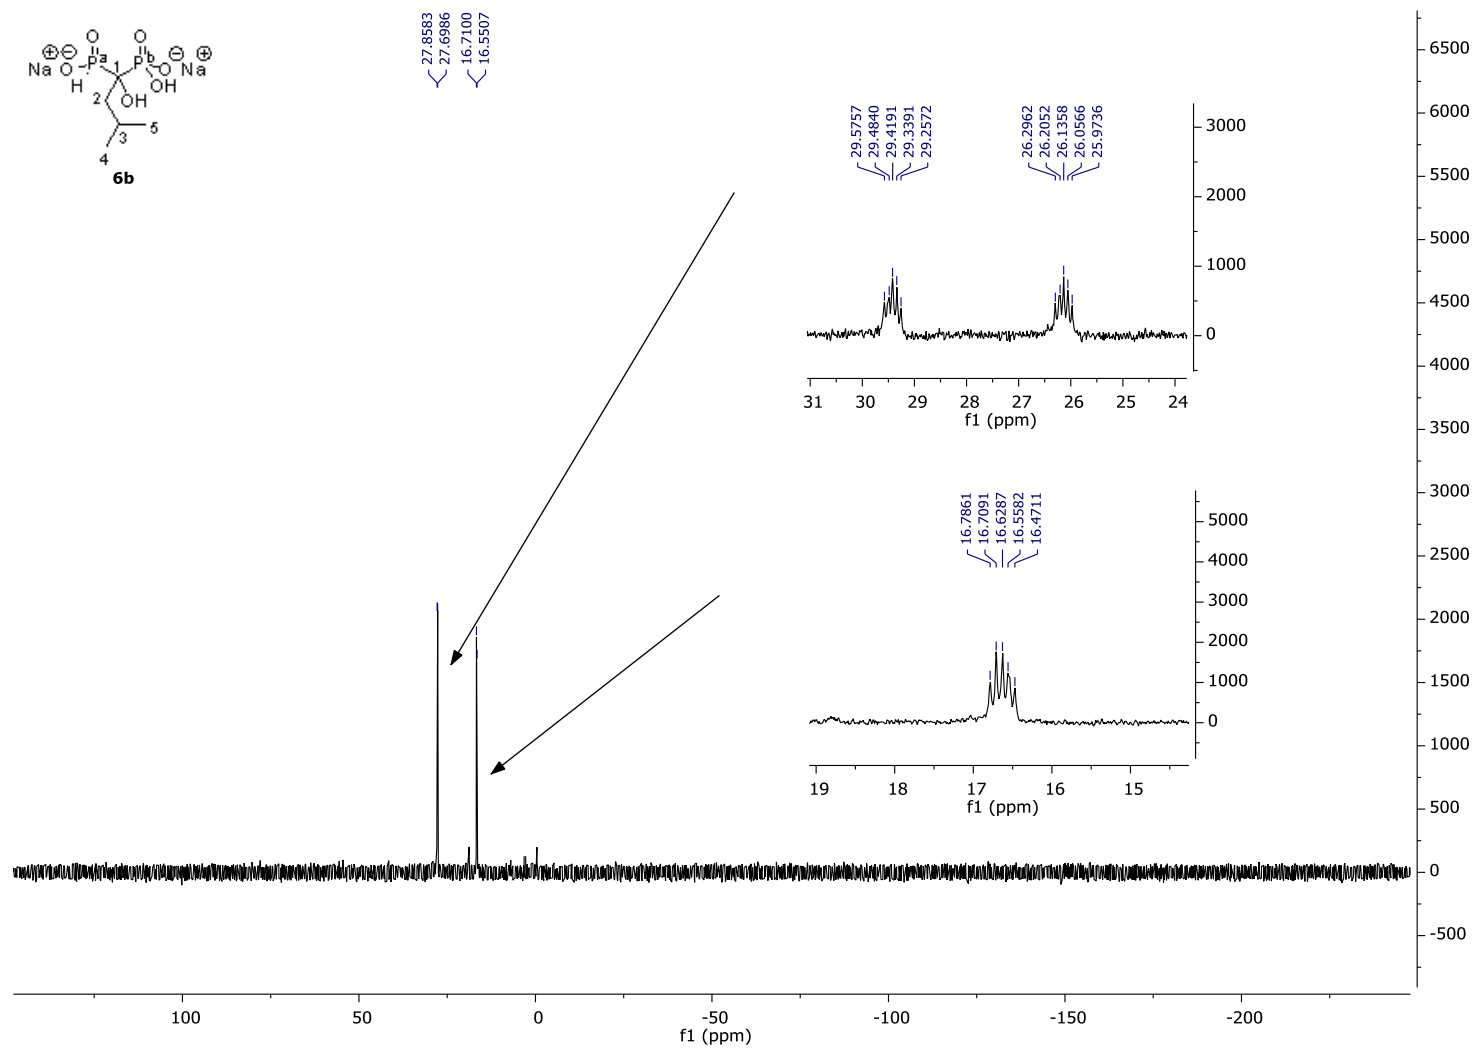

Figure S4:  $^{31}\text{P}\{^1\text{H}\}$  and  $^{31}\text{P}$  NMR (162 MHz,  $\text{D}_2\text{O}$ ) spectra of 1-hydroxy-3-methylbutane-1,1-bis(*H*-phosphinylphosphonate) disodium salt **6b**

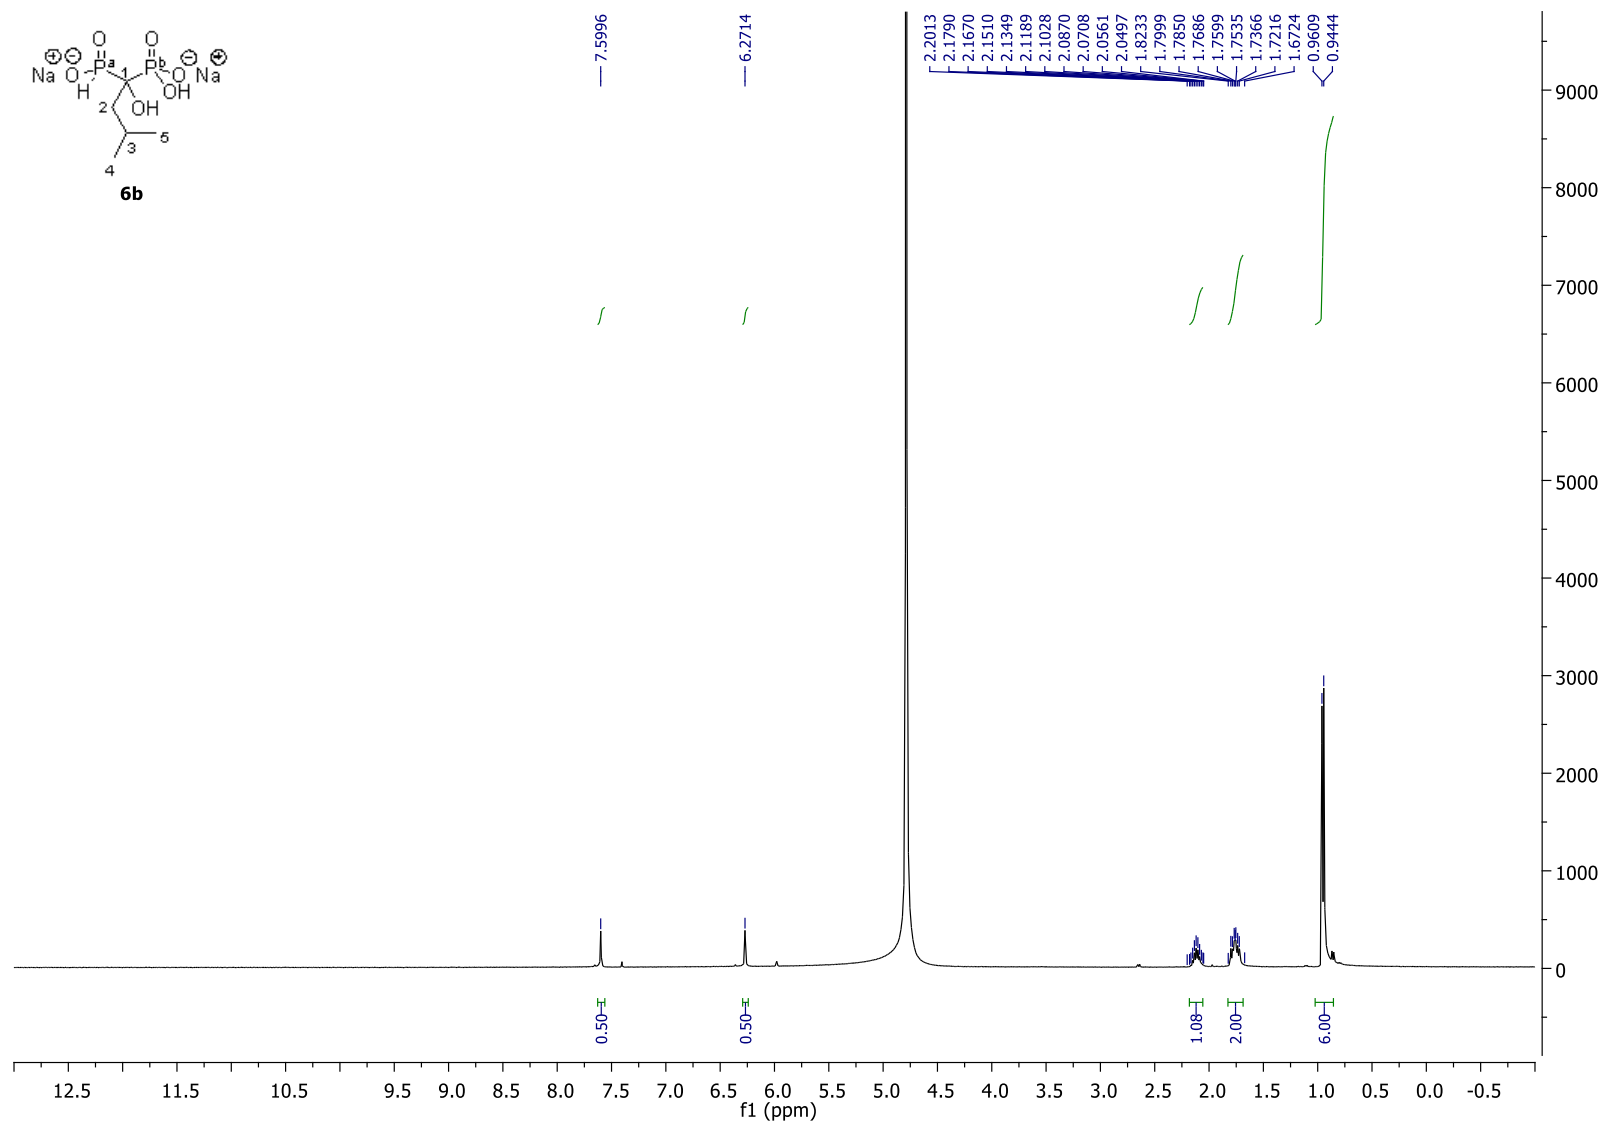

Figure S5:  $^1\text{H}$  NMR (400 MHz,  $\text{D}_2\text{O}$ ) spectrum of 1-hydroxy-3-methylbutane-1,1-bis(*H*-phosphinylphosphonate) disodium salt **6b**

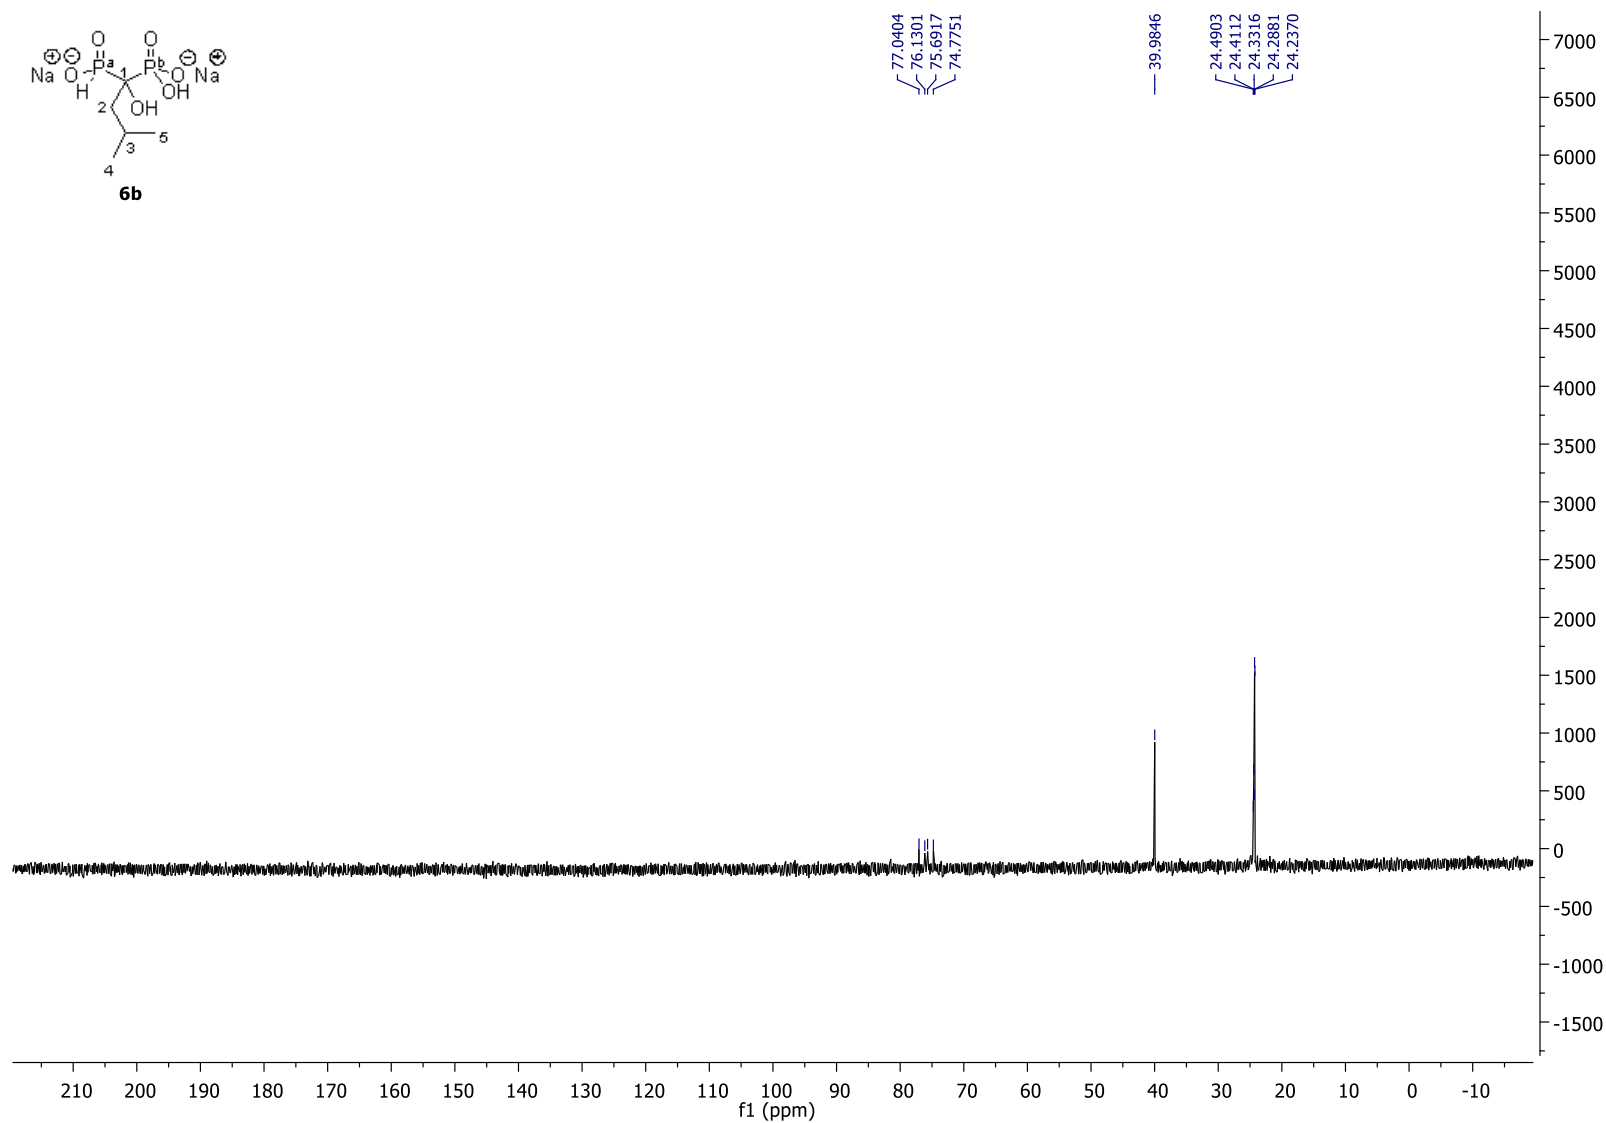

Figure S6:  $^{13}\text{C}$  NMR (101 MHz,  $\text{D}_2\text{O}$ ) spectrum of 1-hydroxy-3-methylbutane-1,1-bis(*H*-phosphinylphosphonate) disodium salt **6b**

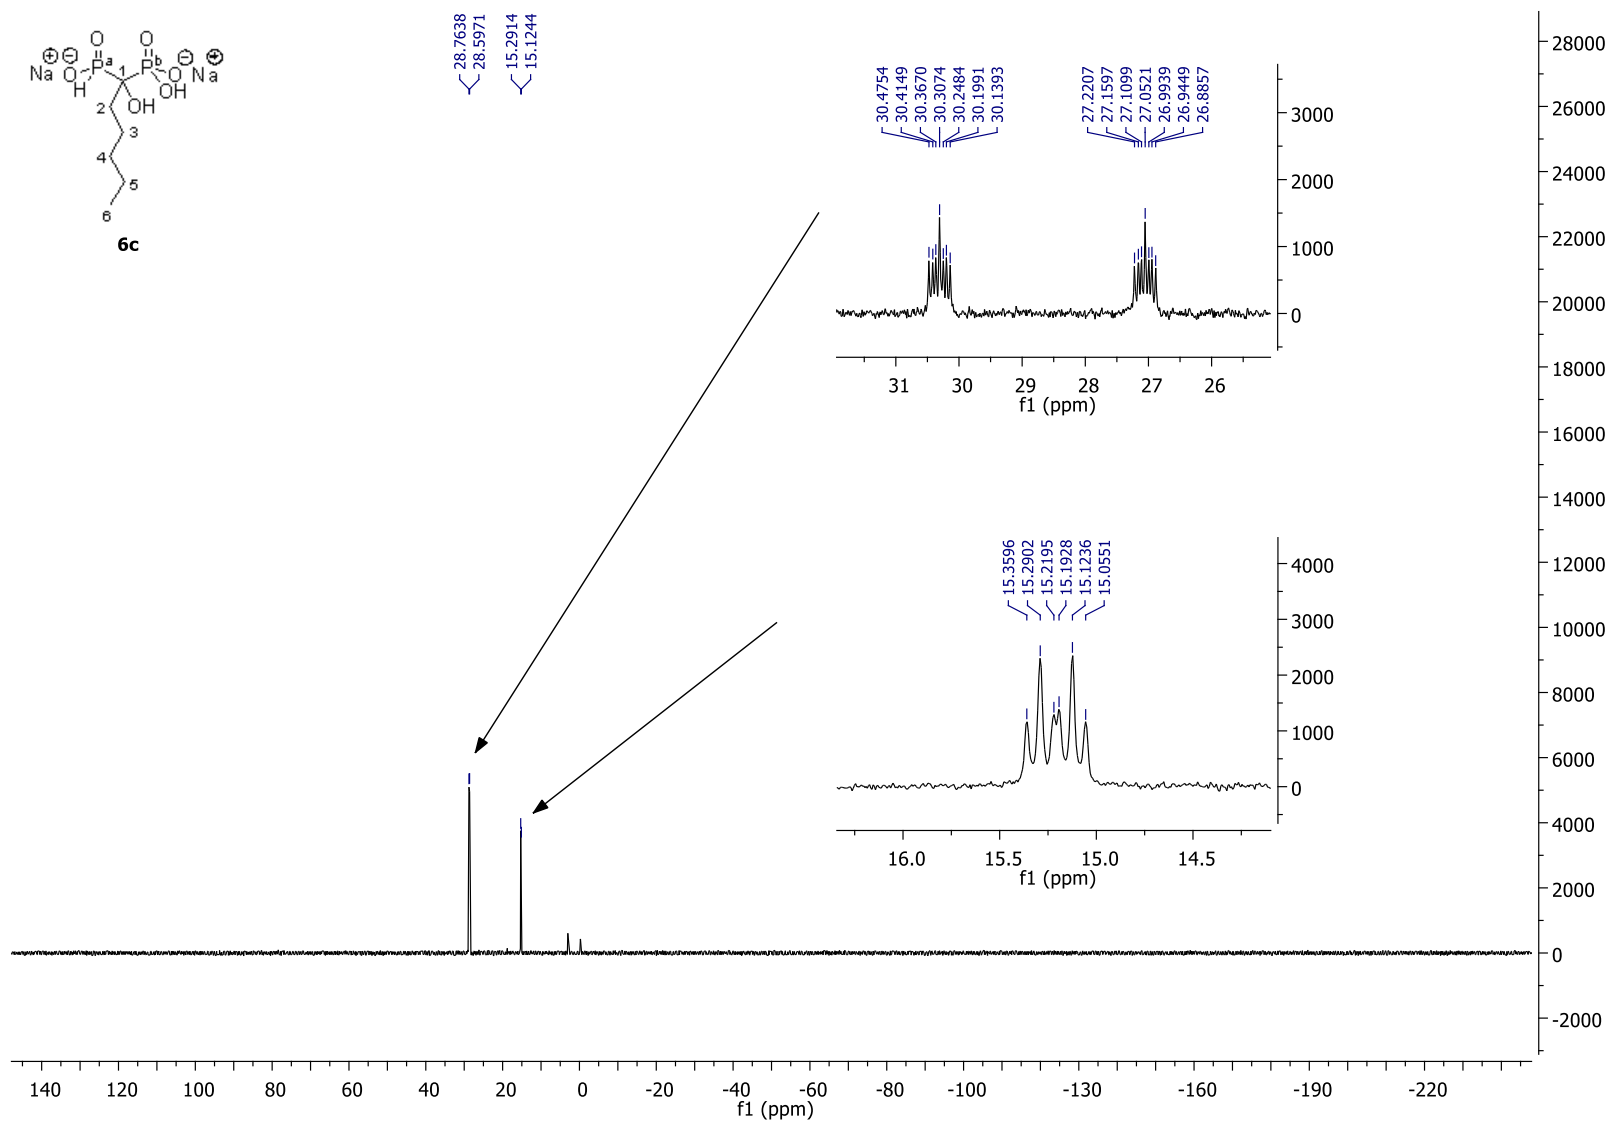

Figure S7:  $^{31}\text{P}\{^1\text{H}\}$  and  $^{31}\text{P}$  NMR (162 MHz,  $\text{D}_2\text{O}$ ) spectra of 1-hydroxyhexane-1,1-bis(*H*-phosphinylphosphonate) disodium salt **6c**



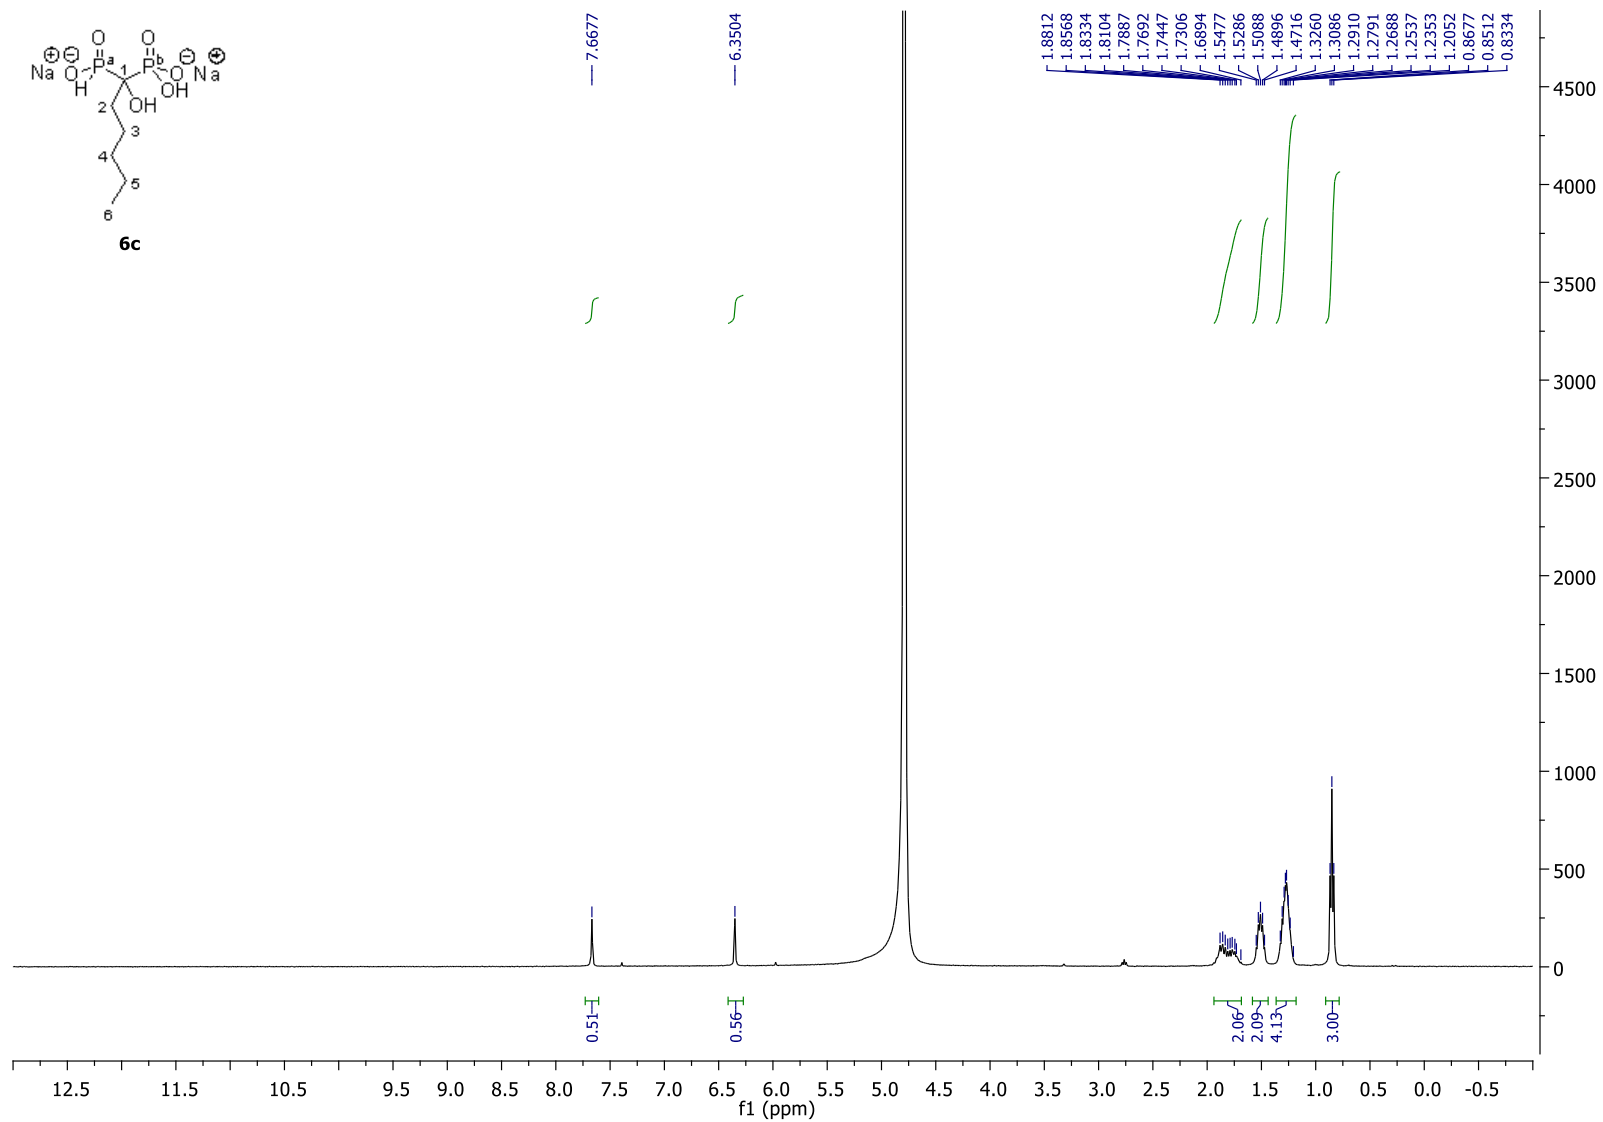

Figure S8: <sup>1</sup>H NMR (400 MHz, D<sub>2</sub>O) spectrum of 1-hydroxyhexane-1,1-bis(*H*-phosphinylphosphonate) disodium salt **6c**

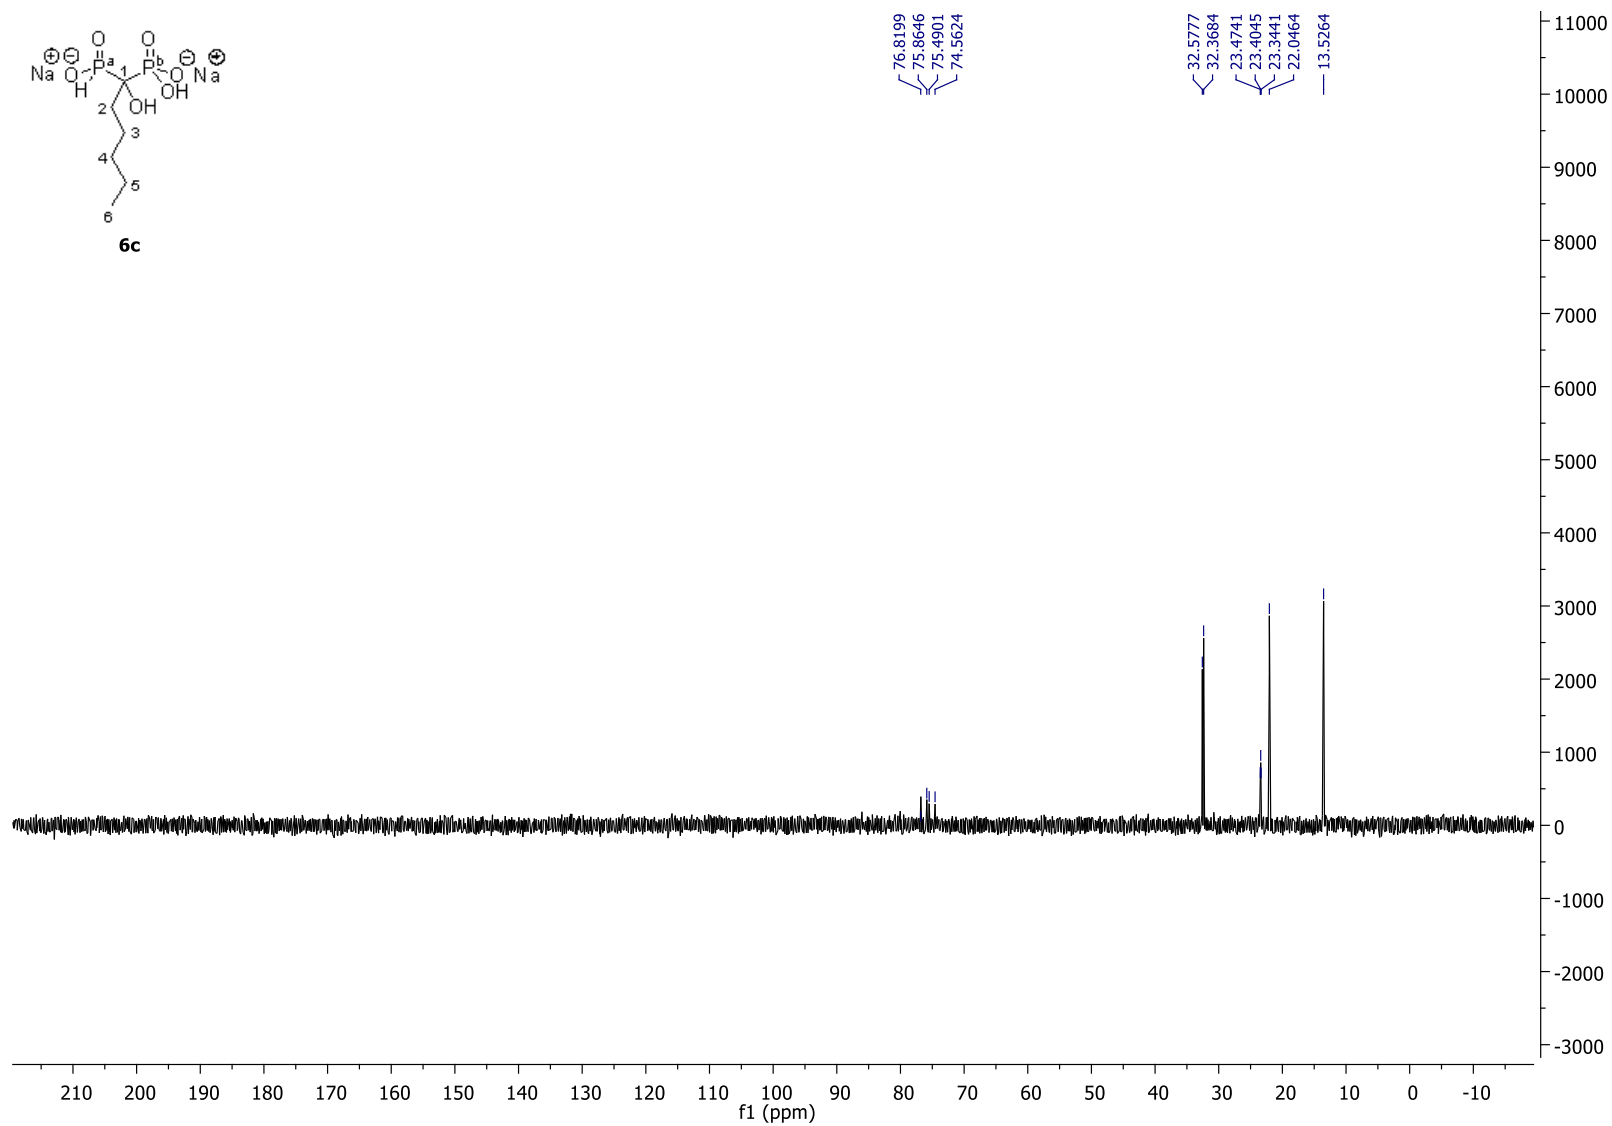

Figure S9:  $^{13}\text{C}$  NMR (101 MHz,  $\text{D}_2\text{O}$ ) spectrum of 1-hydroxyhexane-1,1-bis(*H*-phosphinylphosphonate) disodium salt **6c**

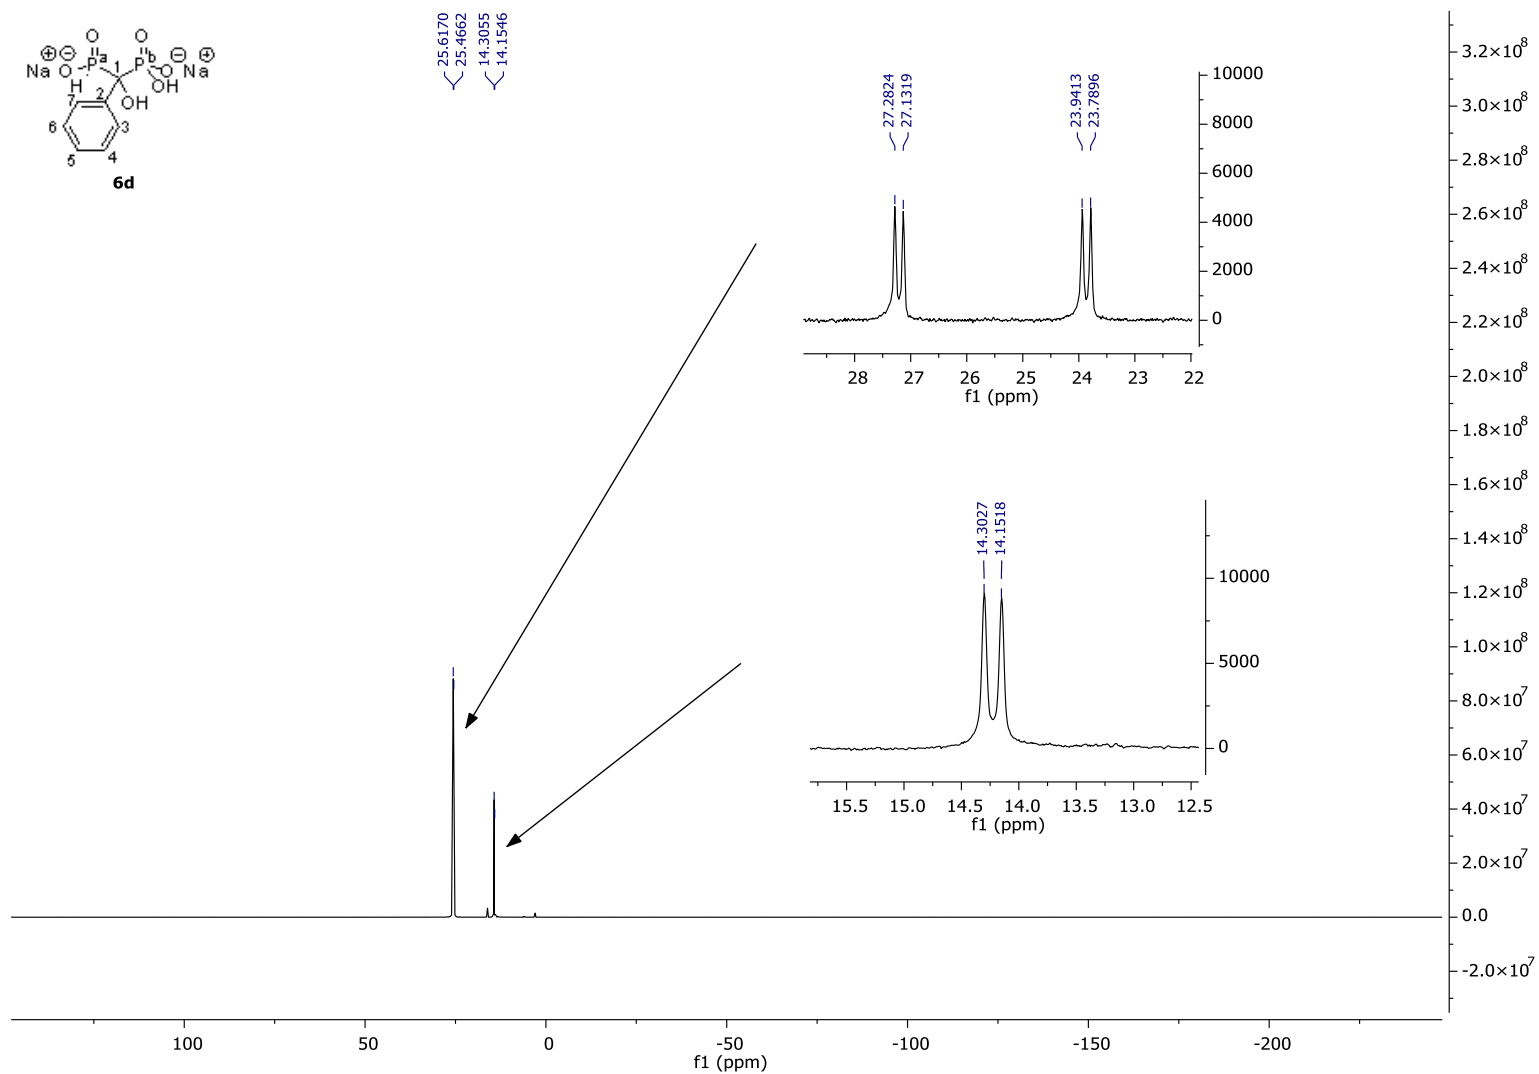

Figure S10:  $^{31}\text{P}\{^1\text{H}\}$  and  $^{31}\text{P}$  NMR (162 MHz,  $\text{D}_2\text{O}$ ) spectra of 1-hydroxy-1-phenylmethane-1,1-bis(*H*-phosphinylphosphonate) disodium salt **6d**

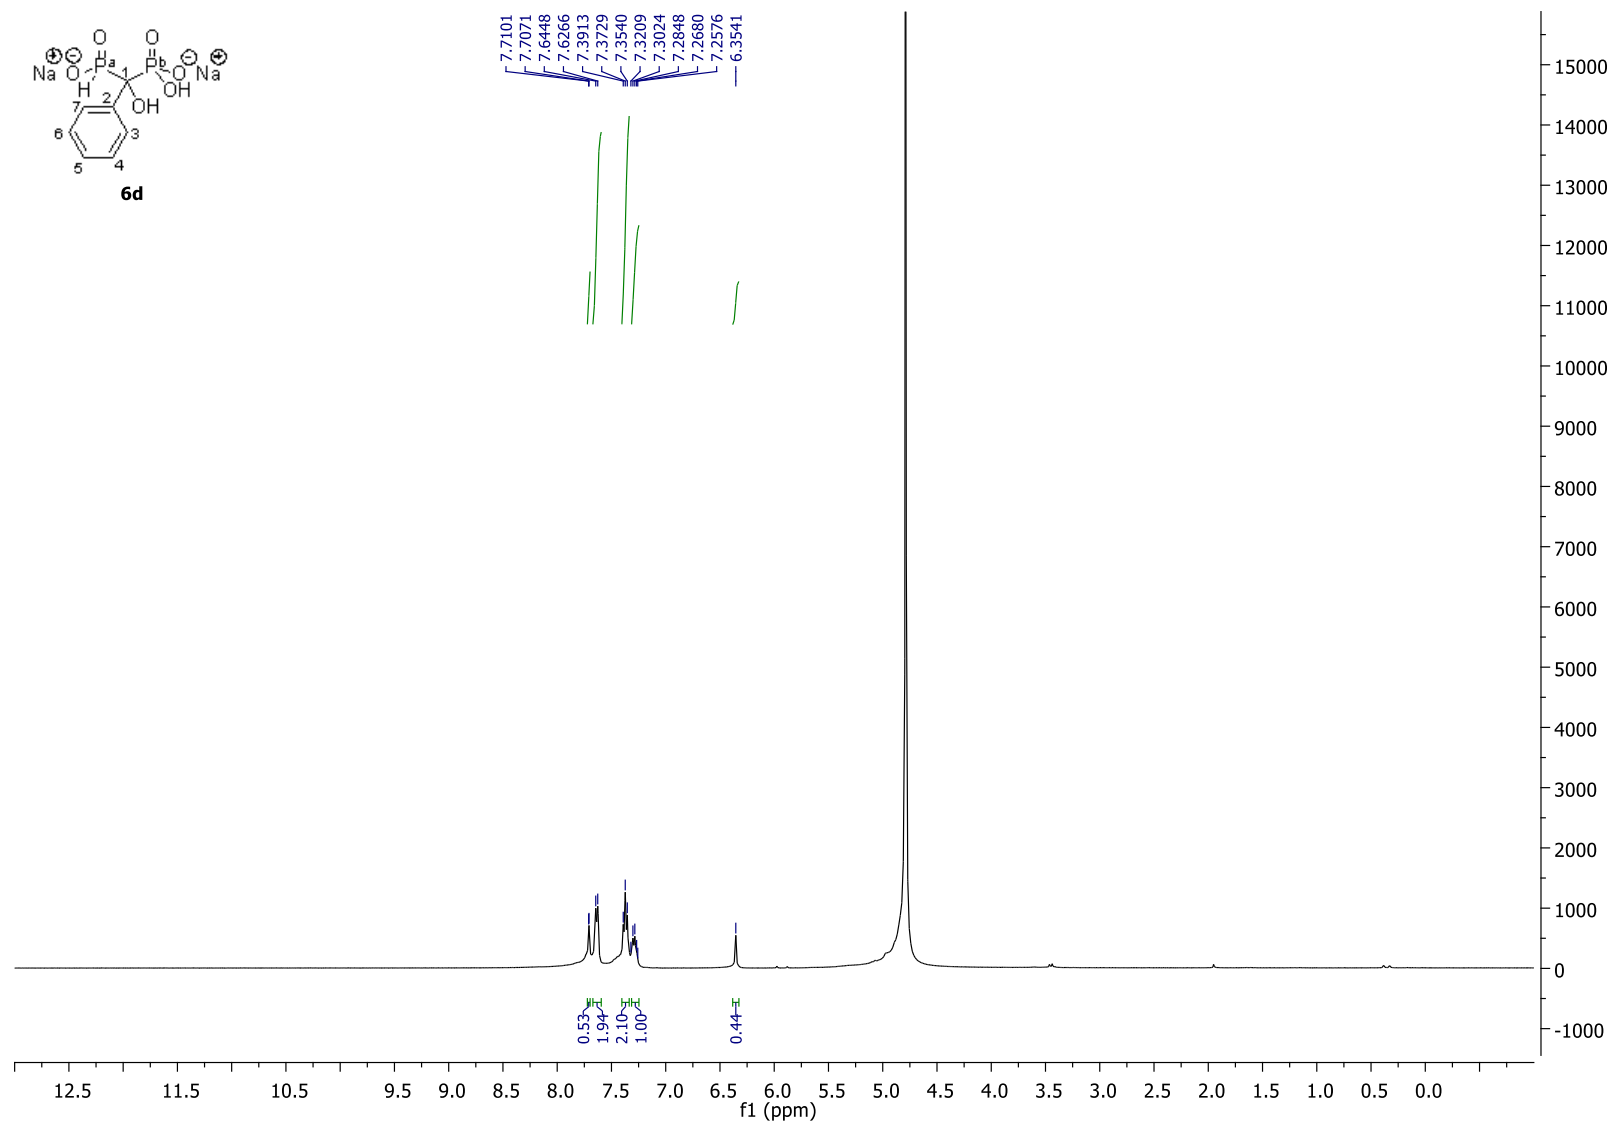

Figure S11: <sup>1</sup>H NMR (400 MHz, D<sub>2</sub>O) spectrum of 1-hydroxy-1-phenylmethane-1,1-bis(*H*-phosphinylphosphonate) disodium salt **6d**

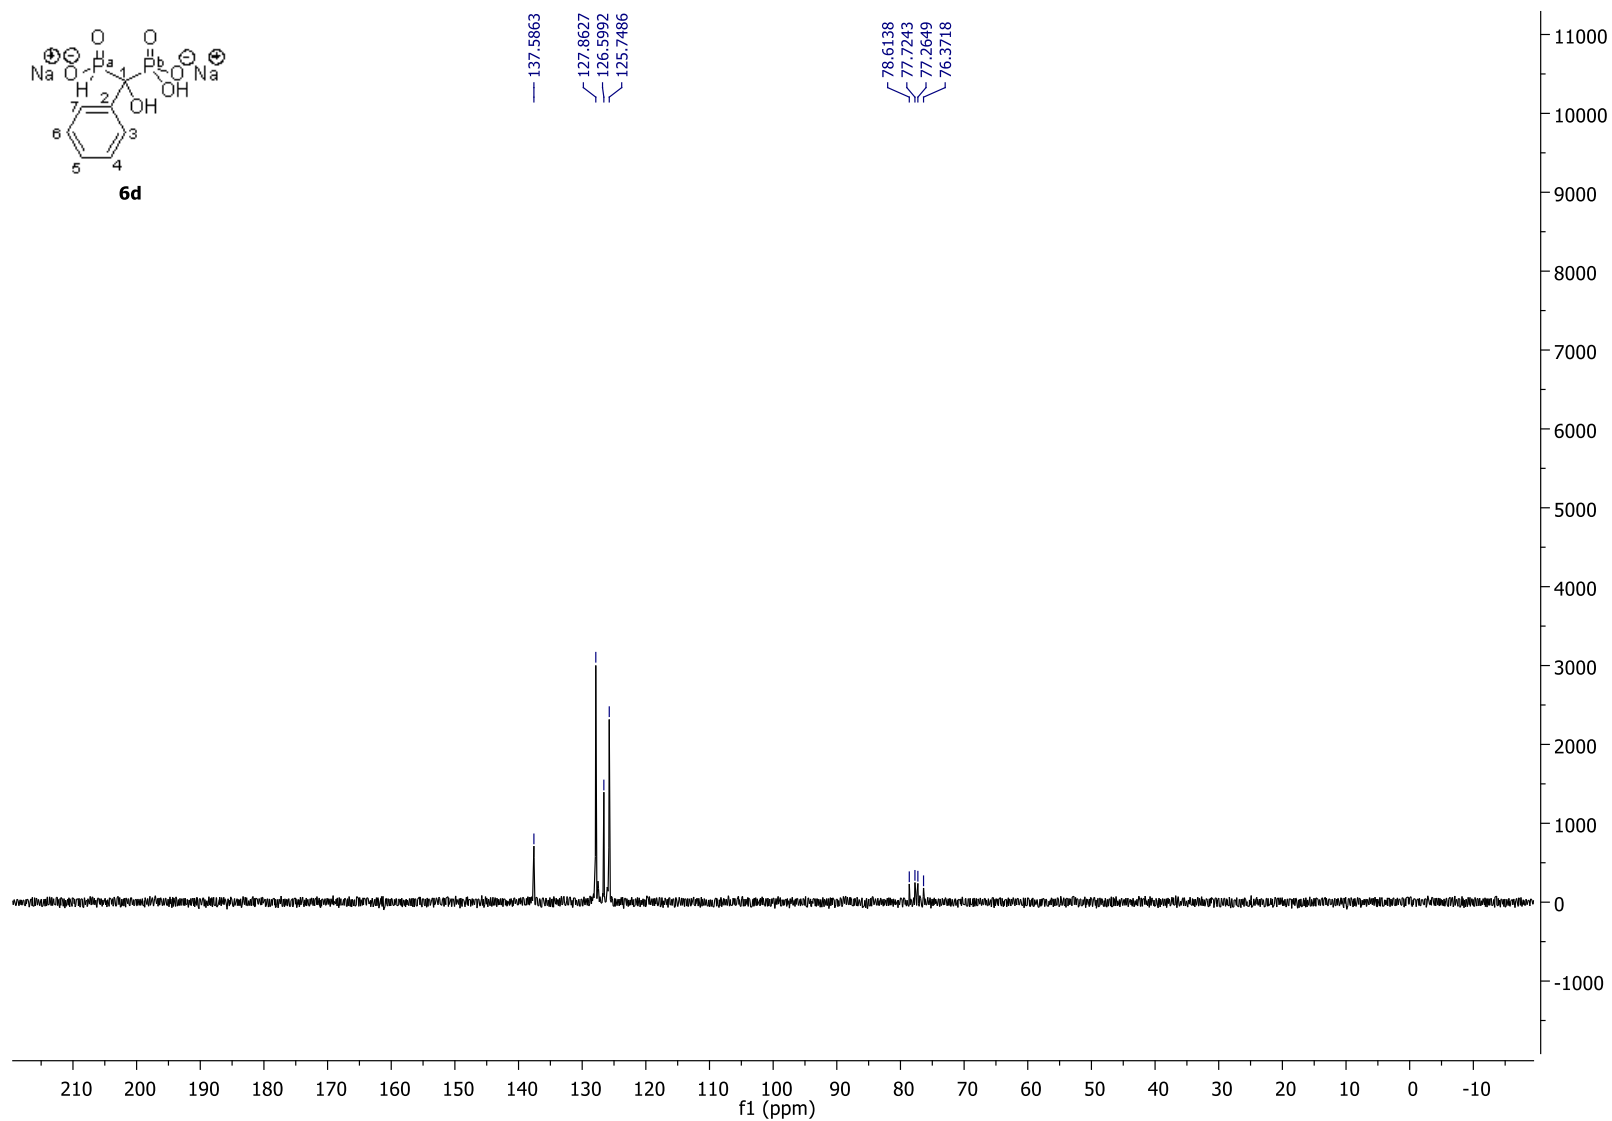

Figure S12:  $^{13}\text{C}$  NMR (101 MHz,  $\text{D}_2\text{O}$ ) spectrum of 1-hydroxy-1-phenylmethane-1,1-bis(*H*-phosphinylphosphonate) disodium salt **6d**

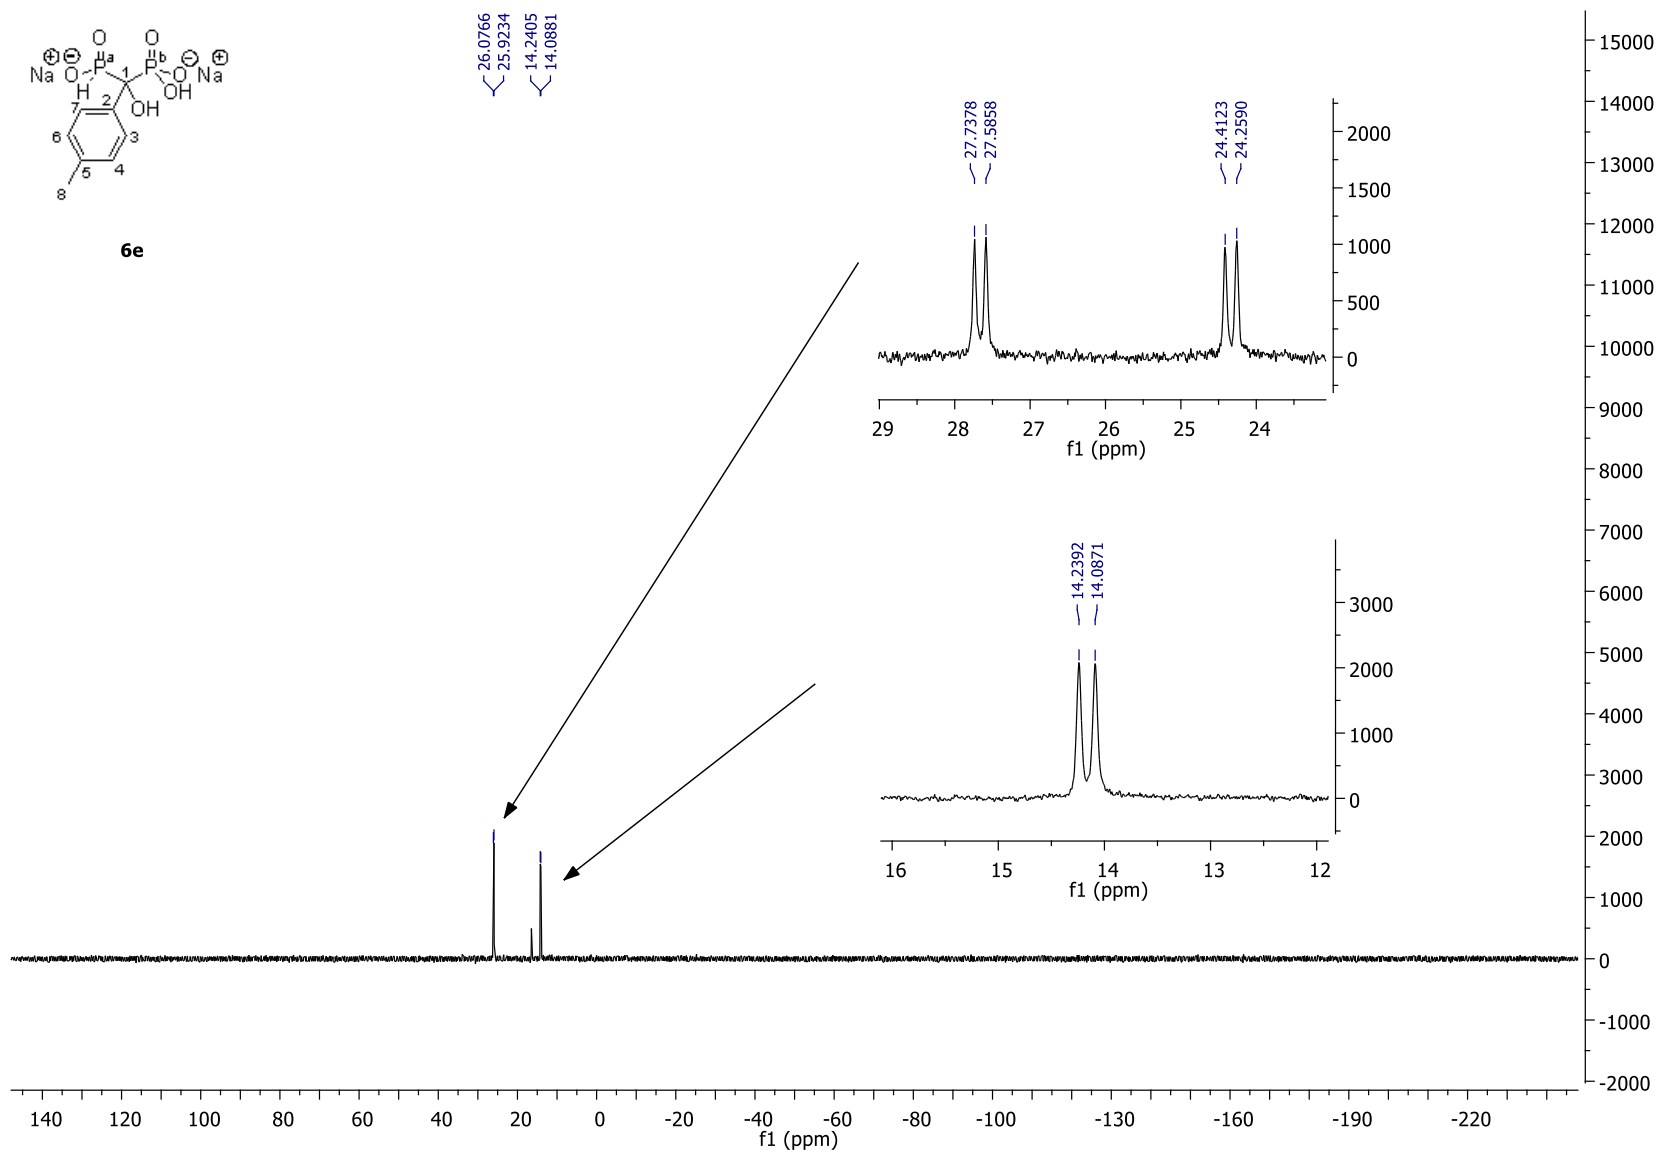

Figure S13:  $^{31}\text{P}\{^1\text{H}\}$  and  $^{31}\text{P}$  NMR (162 MHz,  $\text{D}_2\text{O}$ ) spectra of 1-hydroxy-1-(4-tolyl)methane-1,1-bis(*H*-phosphinylphosphonate) disodium salt **6e**



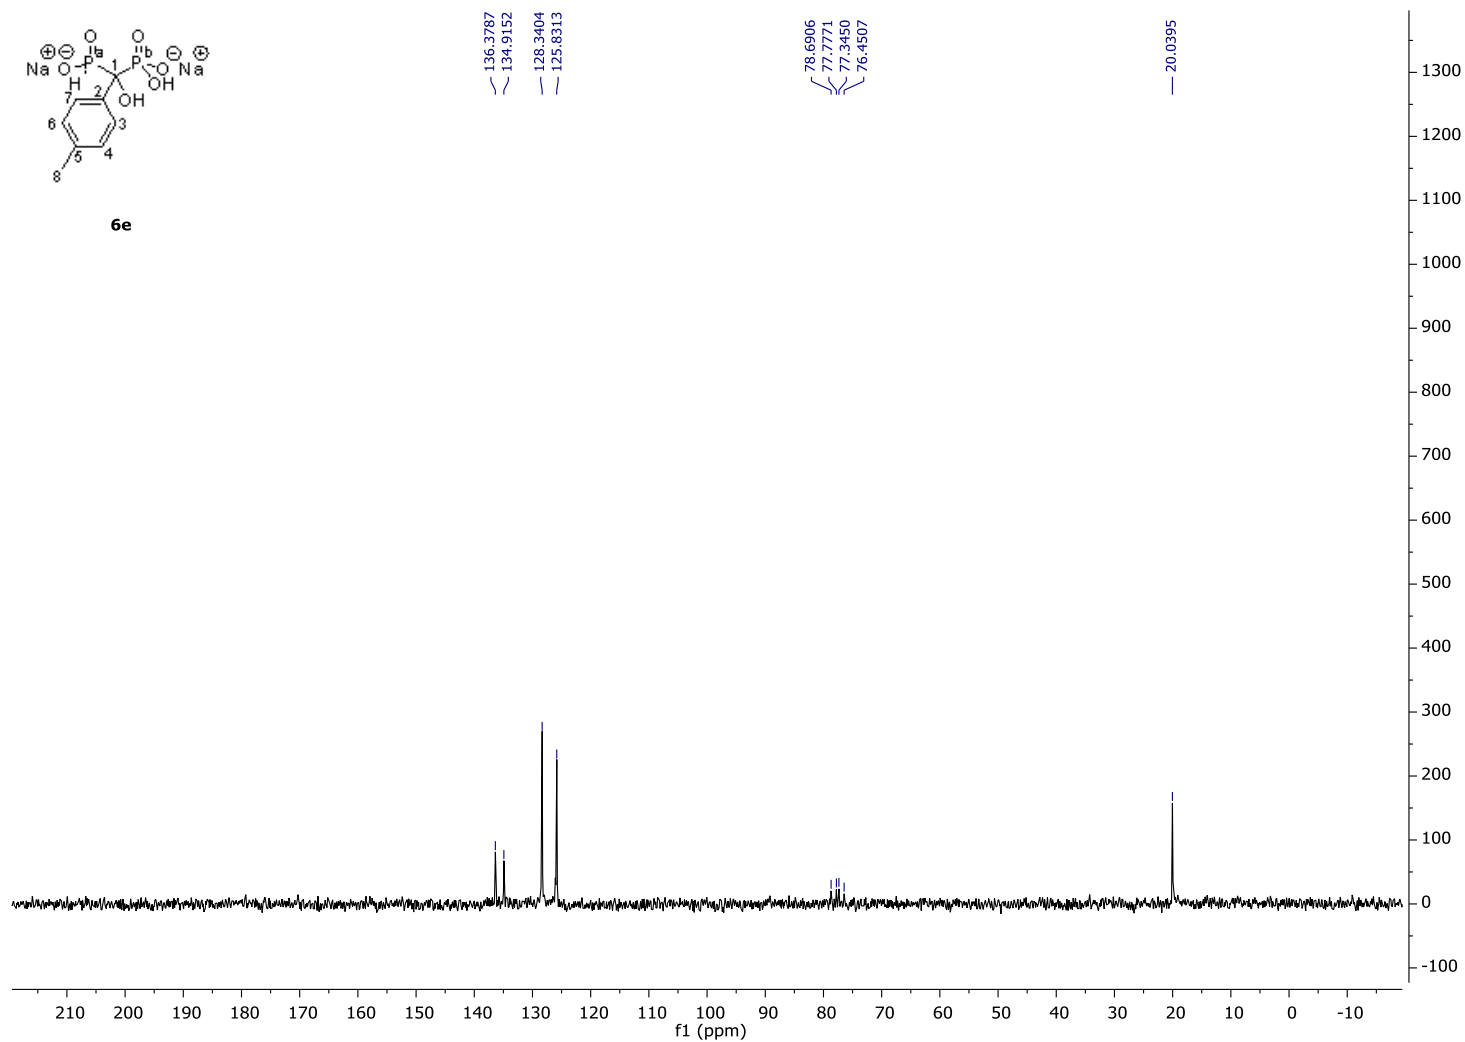

Figure S15: <sup>13</sup>C NMR (101 MHz, D<sub>2</sub>O) spectrum of 1-hydroxy-1-(4-tolyl)methane-1,1-bis(*H*-phosphinylphosphonate) disodium salt **6e**



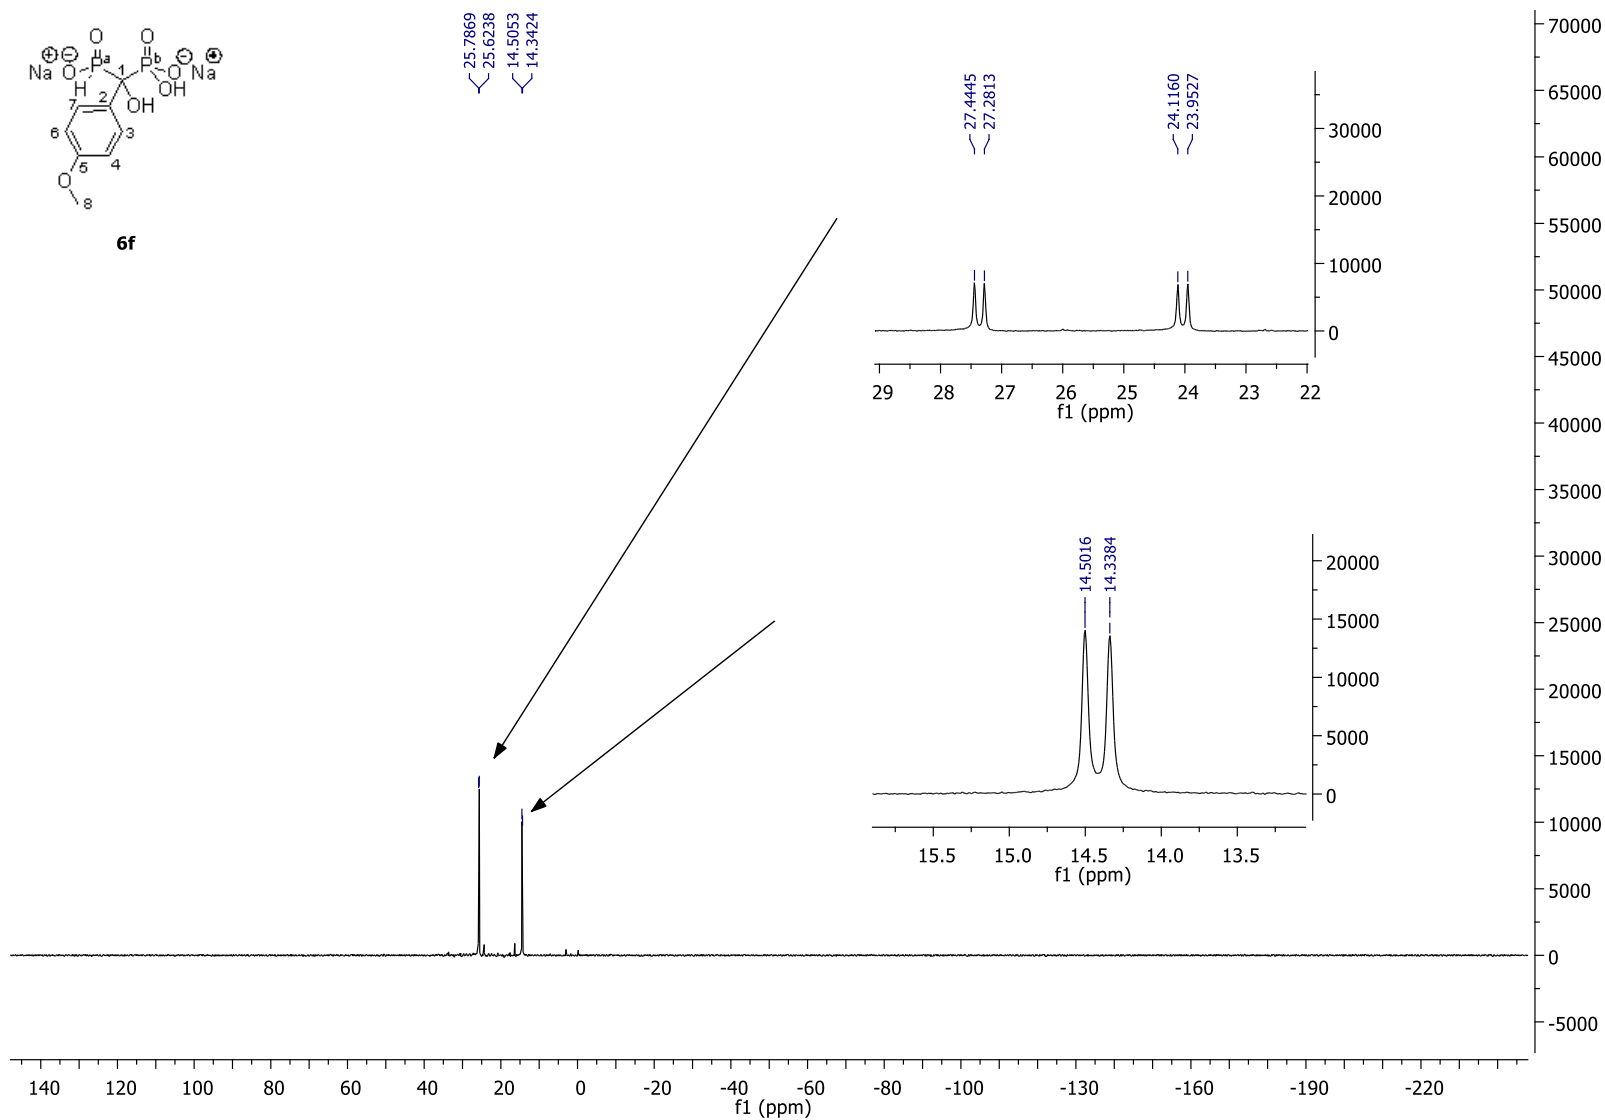

Figure S16:  $^{31}\text{P}\{^1\text{H}\}$  and  $^{31}\text{P}$  NMR (162 MHz,  $\text{D}_2\text{O}$ ) spectra of hydroxy-1-(4-methoxyphenyl)methane-1,1-bis(*H*-phosphinylphosphonate) disodium salt **6f**

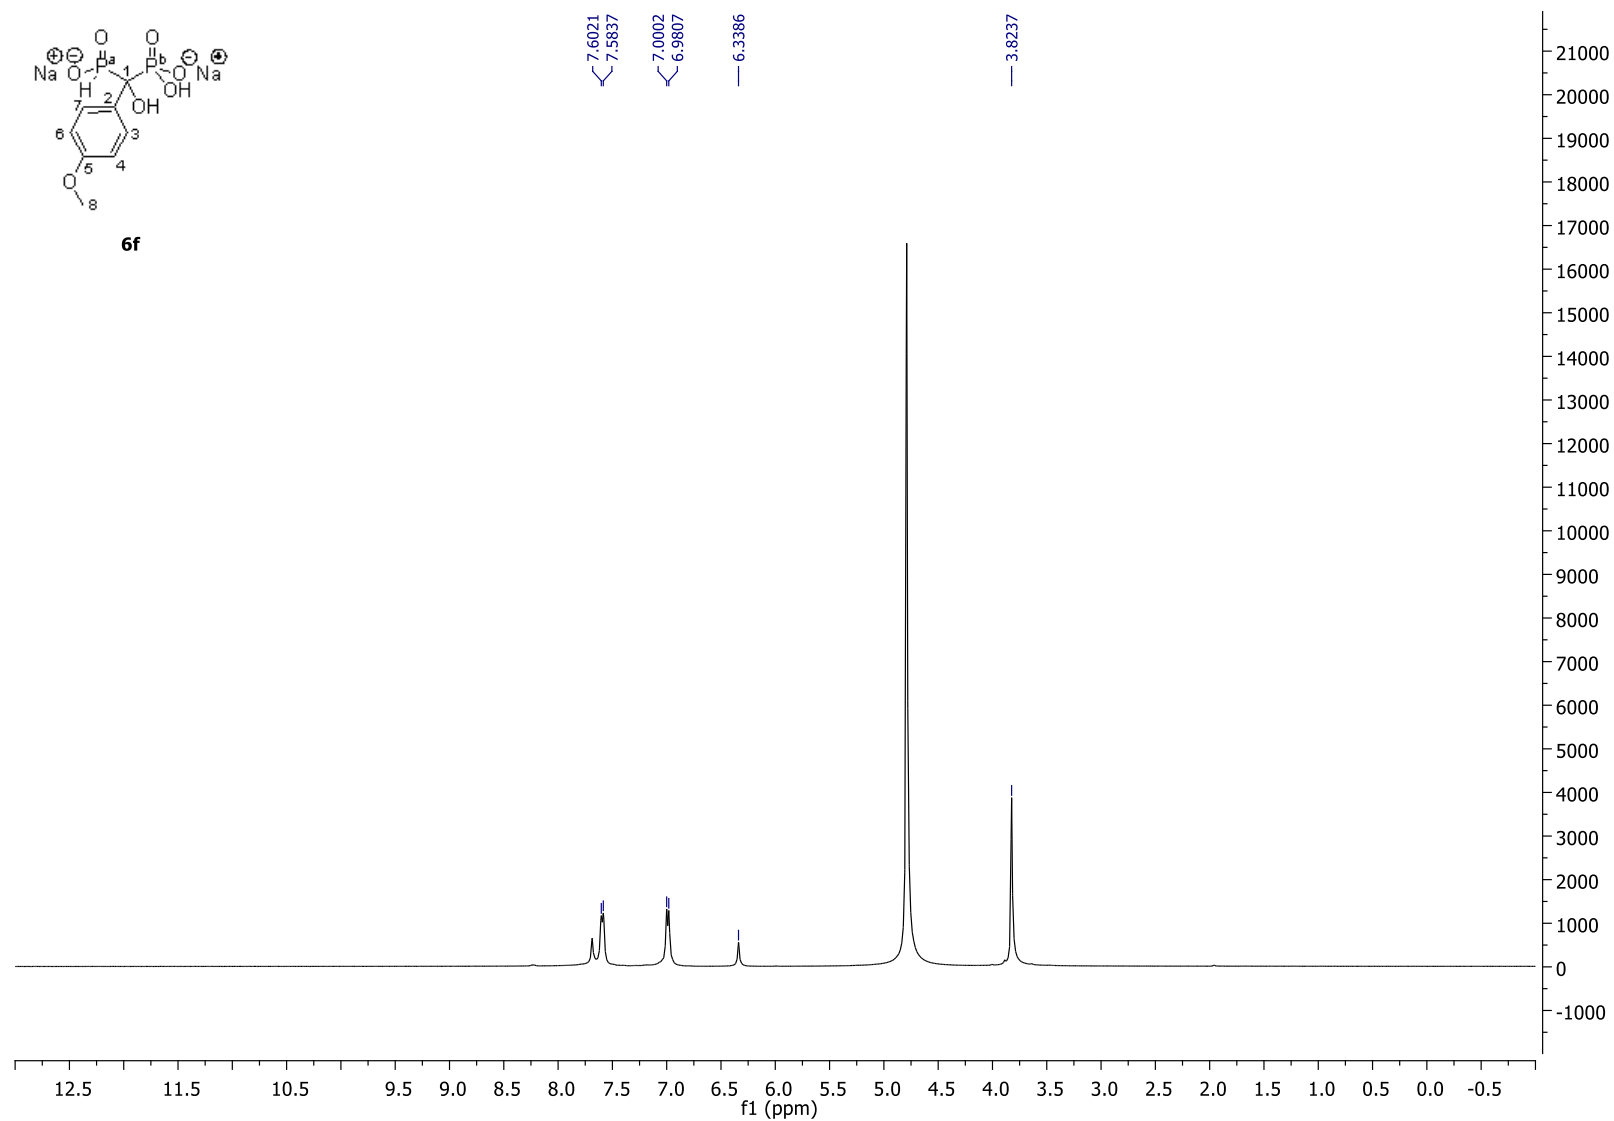

Figure S17:  $^1\text{H}$  NMR (400 MHz,  $\text{D}_2\text{O}$ ) spectrum of hydroxy-1-(4-methoxyphenyl)methane-1,1-bis(*H*-phosphinylphosphonate) disodium salt **6f**

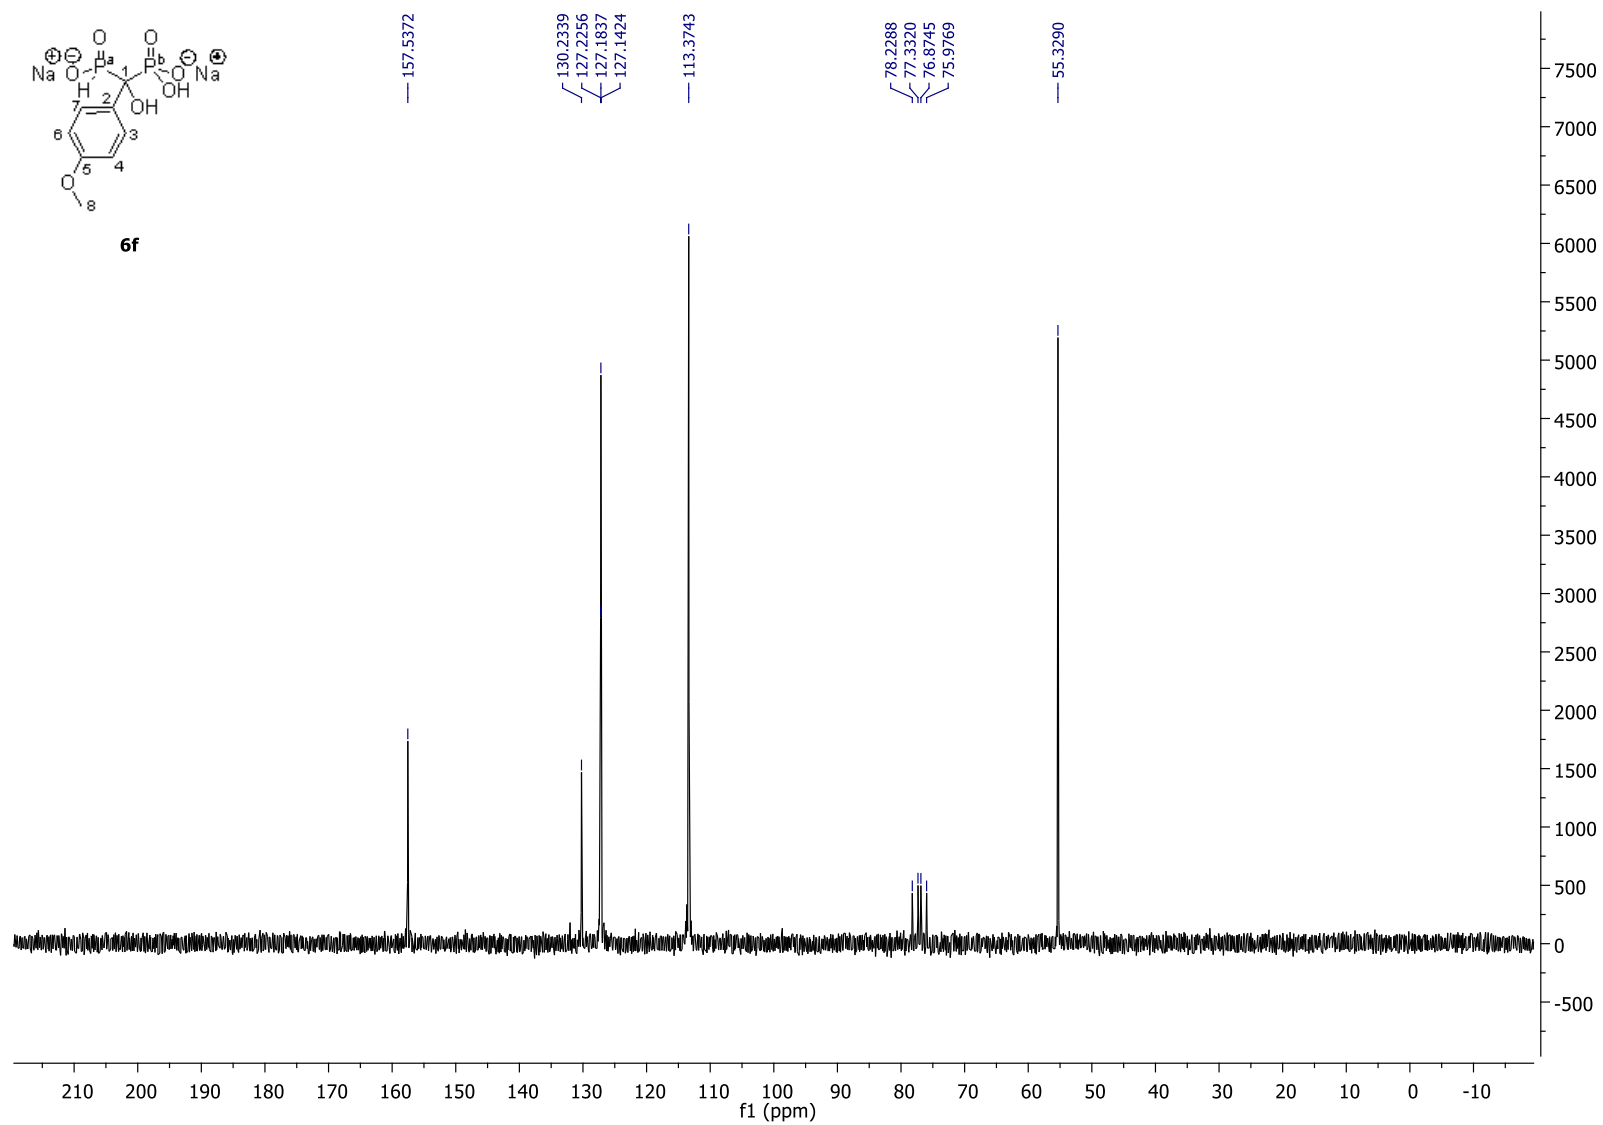

Figure S18:  $^{13}\text{C}$  NMR (101 MHz,  $\text{D}_2\text{O}$ ) spectrum of hydroxy-1-(4-methoxyphenyl)methane-1,1-bis(*H*-phosphinylphosphonate) disodium salt **6f**

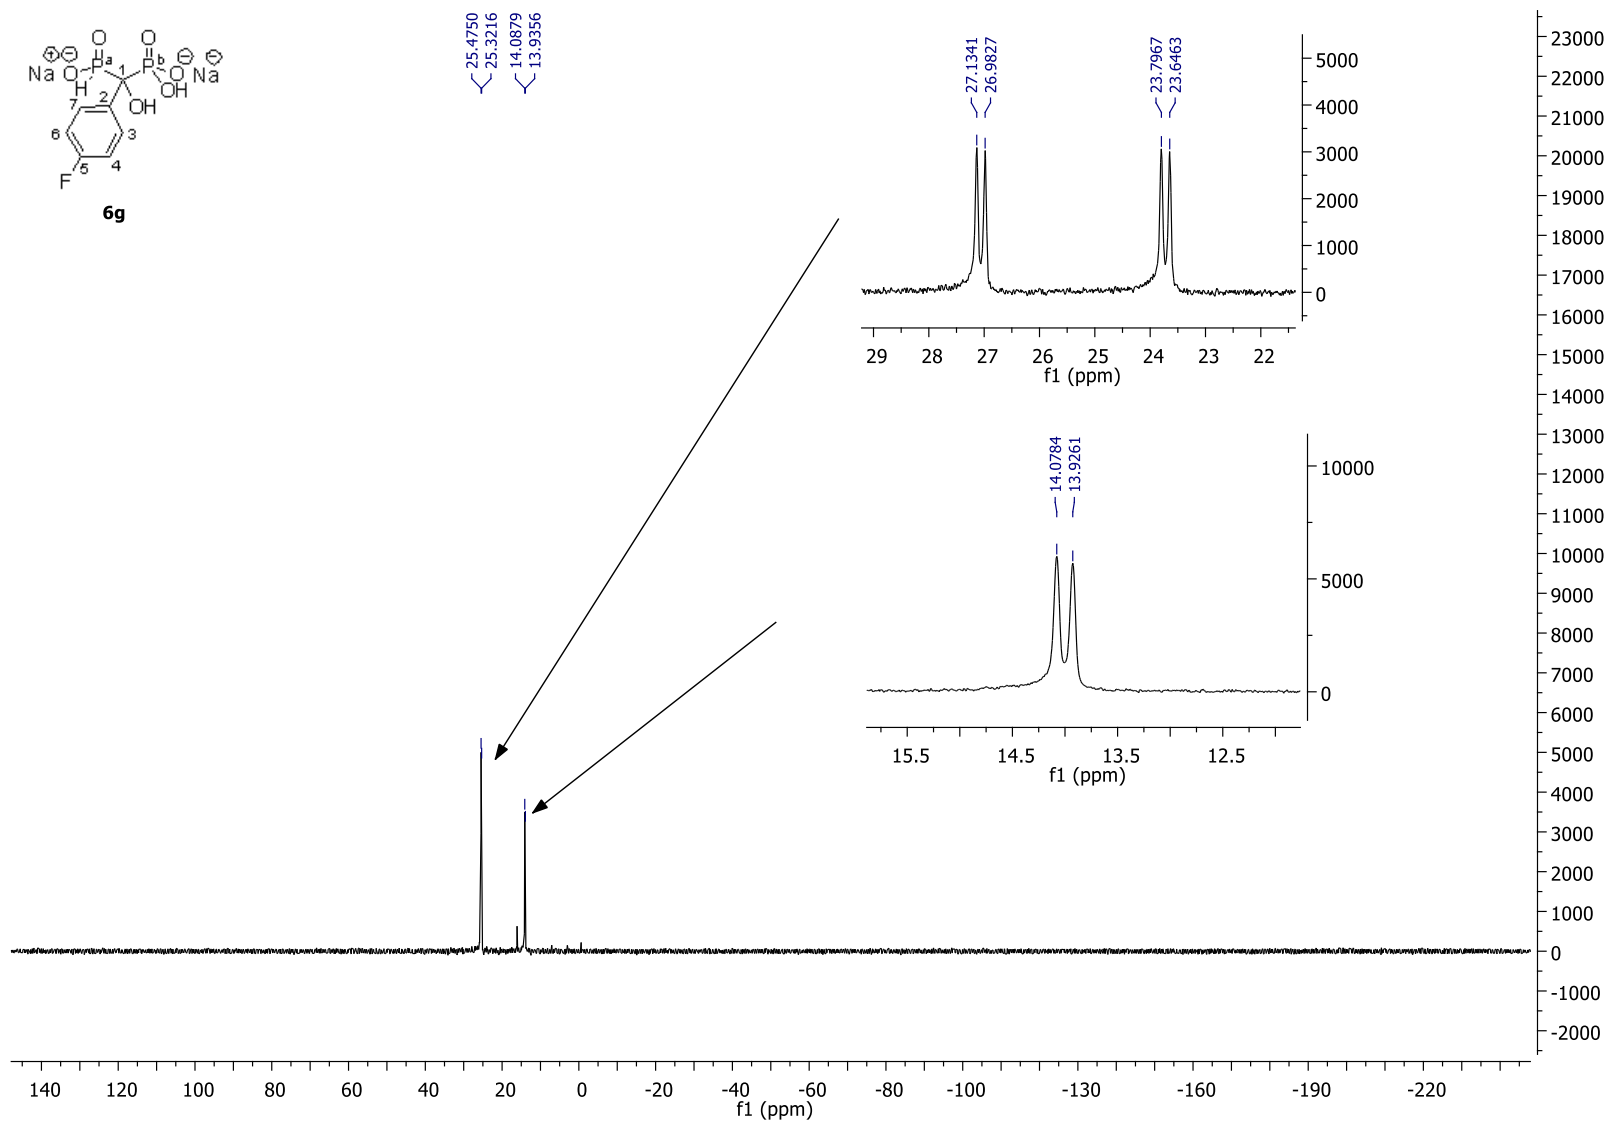

Figure S19:  $^{31}\text{P}\{^1\text{H}\}$  and  $^{31}\text{P}$  NMR (162 MHz,  $\text{D}_2\text{O}$ ) spectra of 1-hydroxy-1-(4-fluorophenyl)methane-1,1-bis(*H*-phosphinylphosphonate) disodium salt **6g**

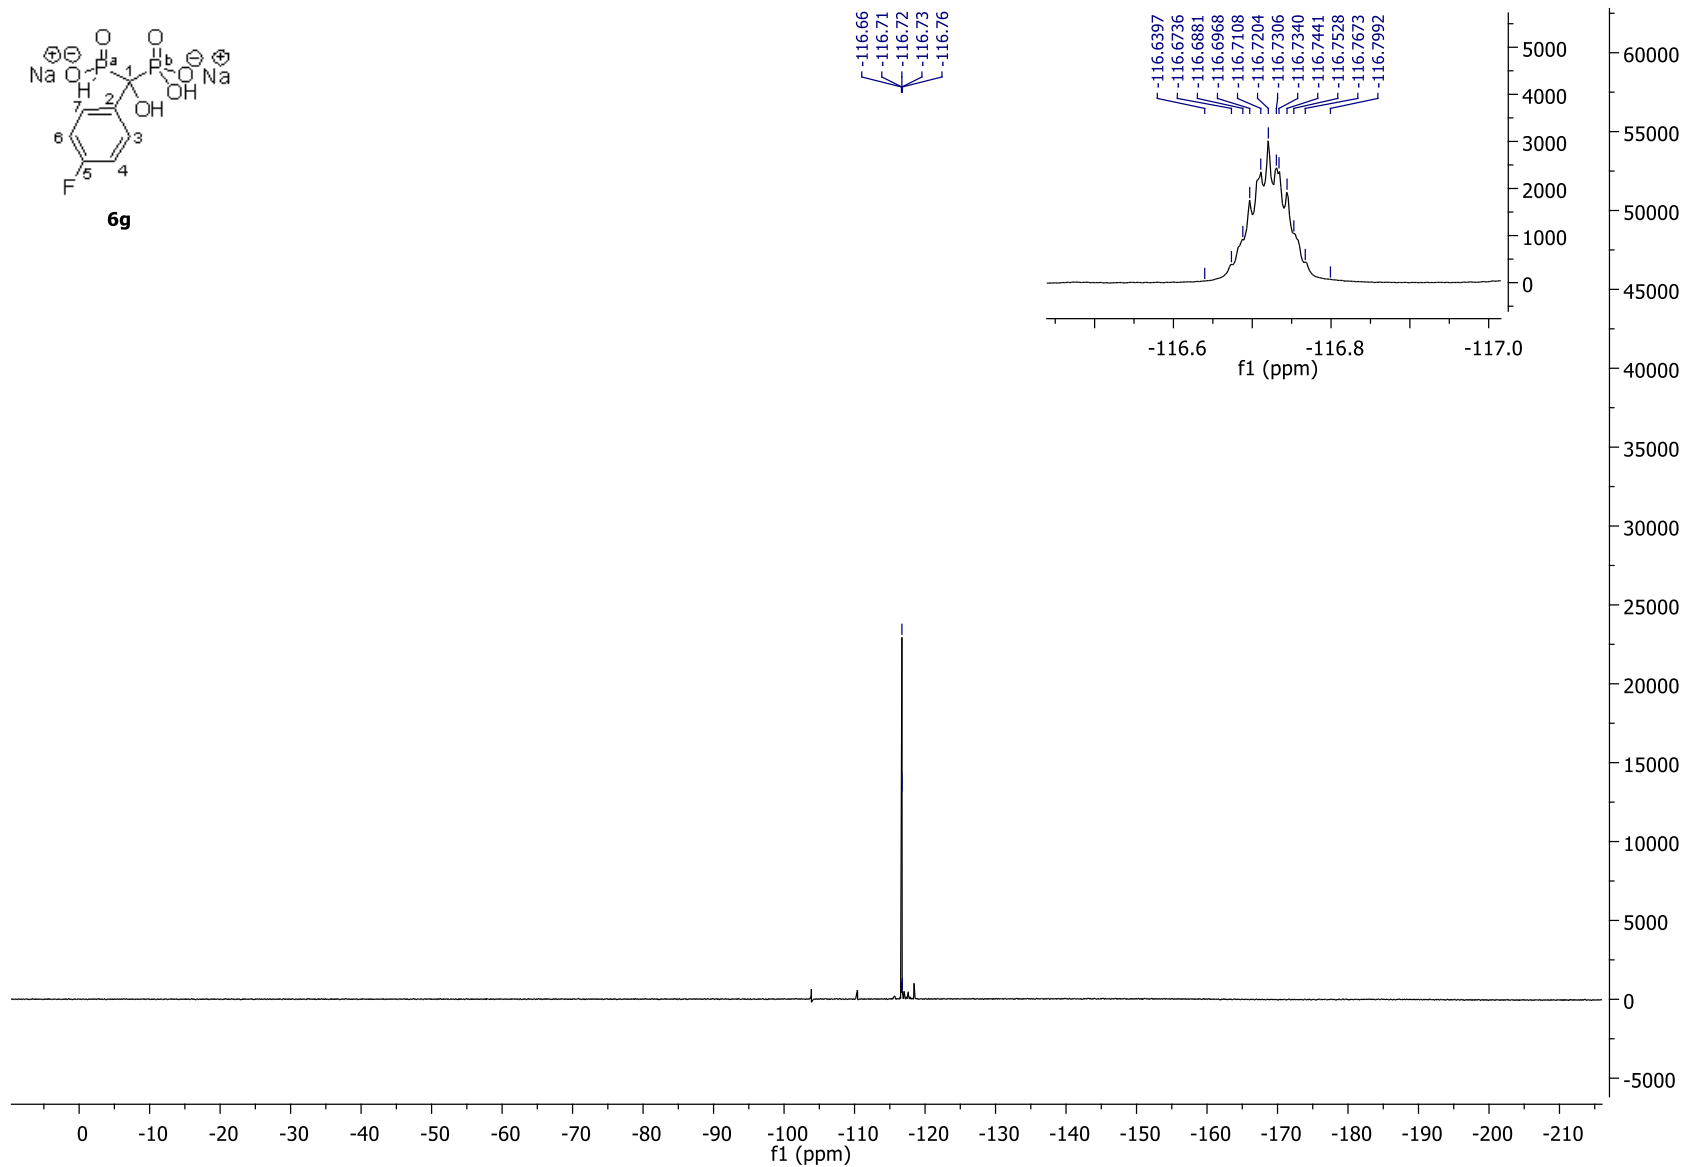

Figure S20:  $^1\text{H}$  and  $^{19}\text{F}$  (377 MHz,  $\text{D}_2\text{O}$ ) spectra of 1-hydroxy-1-(4-fluorophenyl)methane-1,1-bis(*H*-phosphinylphosphonate) disodium salt **6g**

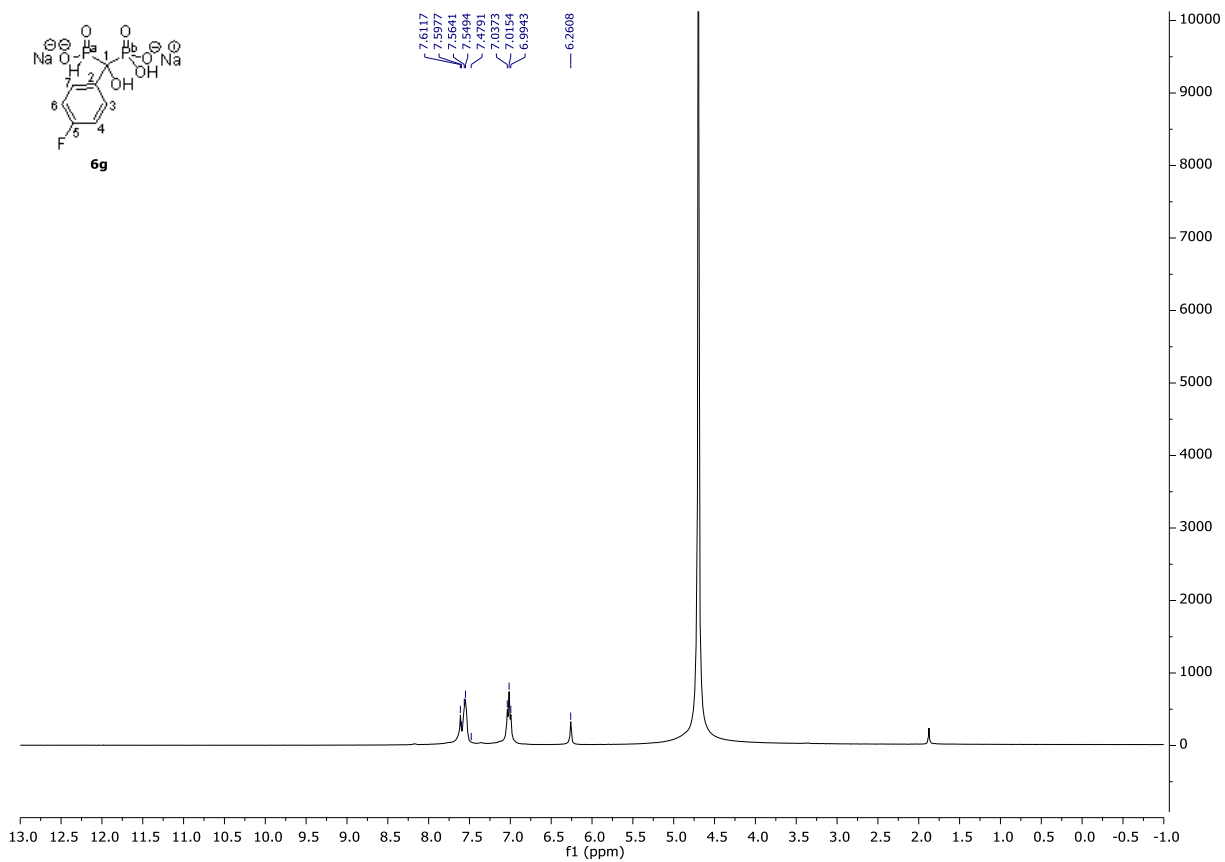

Figure S21: <sup>1</sup>H NMR (400 MHz, D<sub>2</sub>O) spectrum of 1-hydroxy-1-(4-fluorophenyl)methane-1,1-bis(*H*-phosphinylphosphonate) disodium salt **6g**

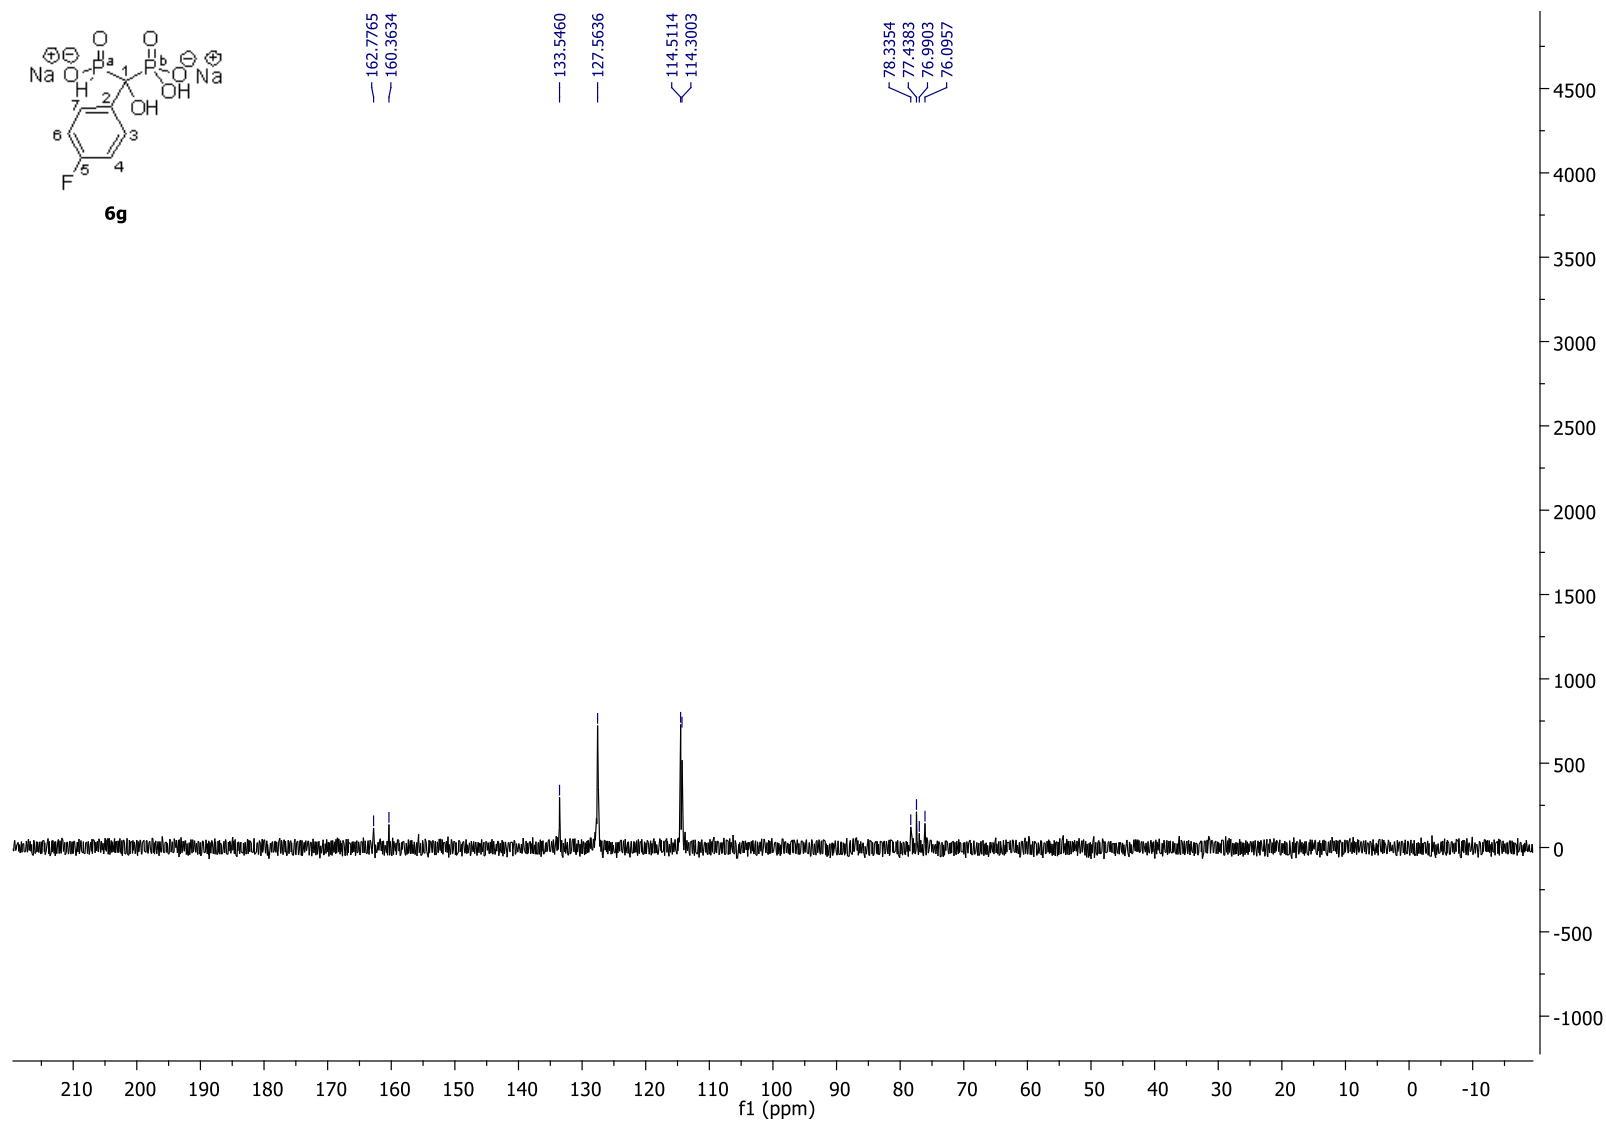

Figure S22: <sup>13</sup>C NMR spectrum of 1-hydroxy-1-(4-fluorophenyl)methane-1,1-bis(*H*-phosphinylphosphonate) disodium salt 6g

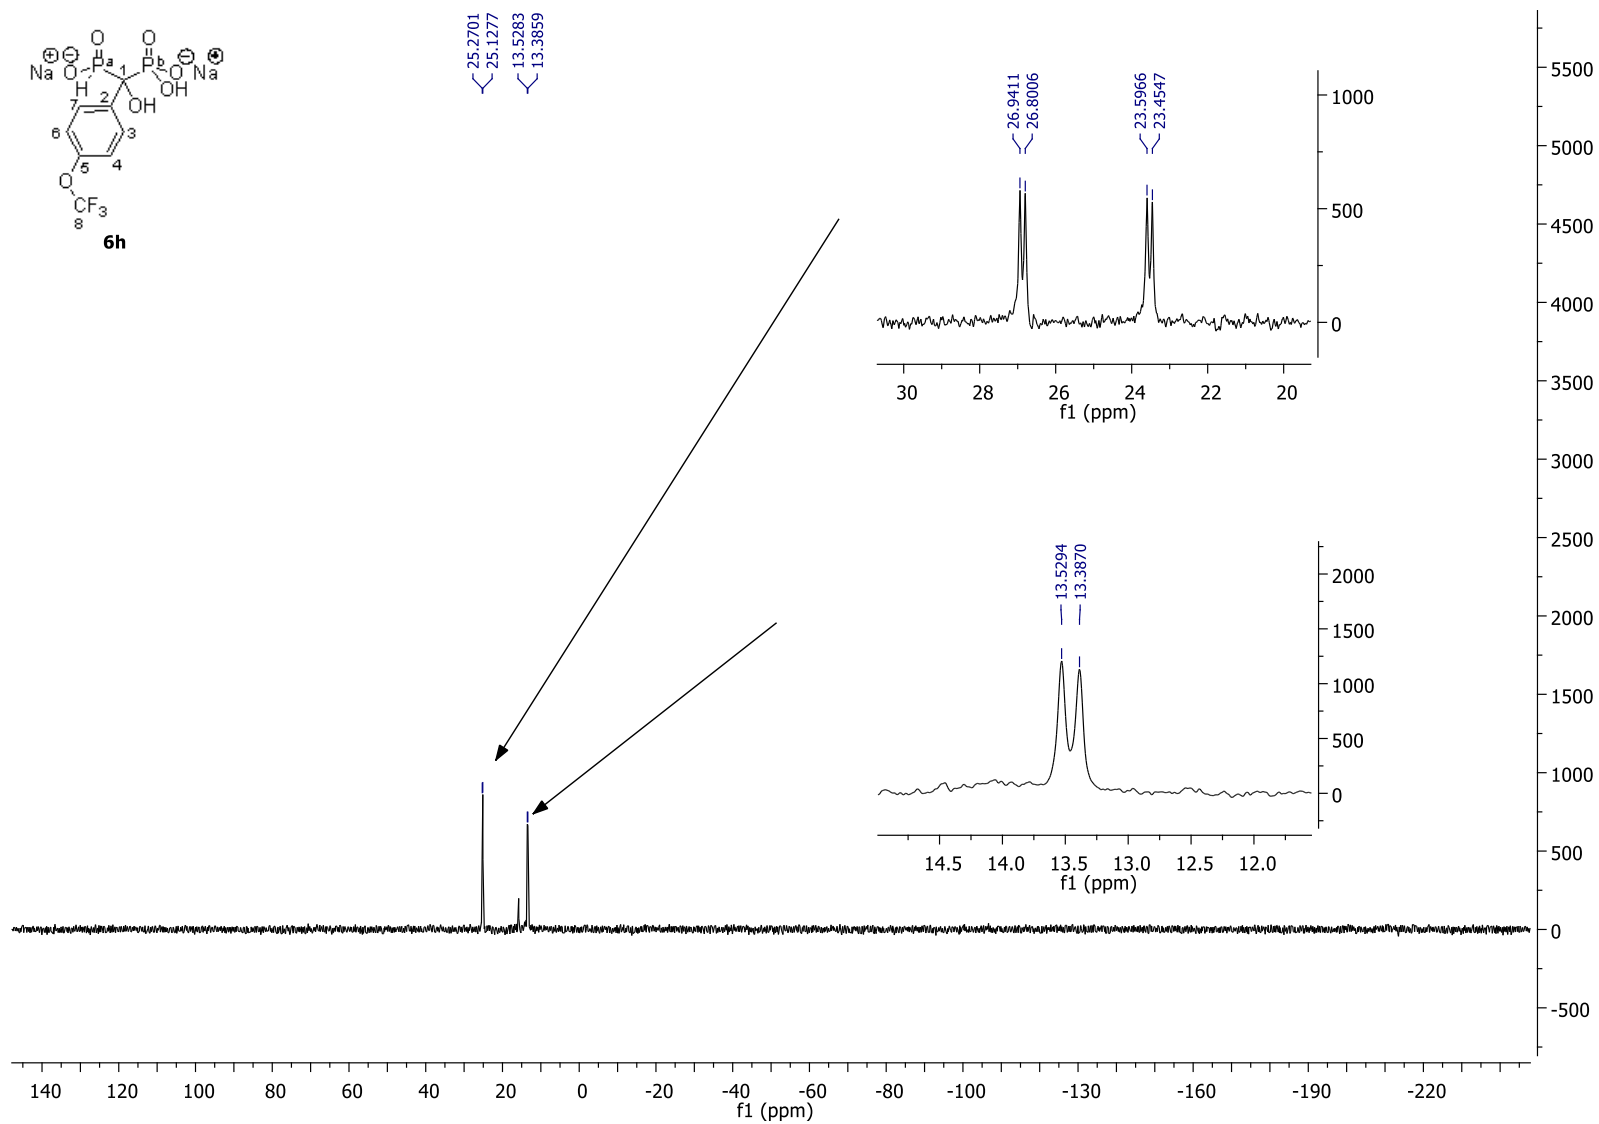

Figure S23:  $^{31}\text{P}\{^1\text{H}\}$  and  $^{31}\text{P}$  NMR (162 MHz,  $\text{D}_2\text{O}$ ) spectra of 1-hydroxy-1-(4-trifluoromethoxyphenyl)methane-1,1-bis(*H*-phosphinylphosphonate) disodium salt **6h**



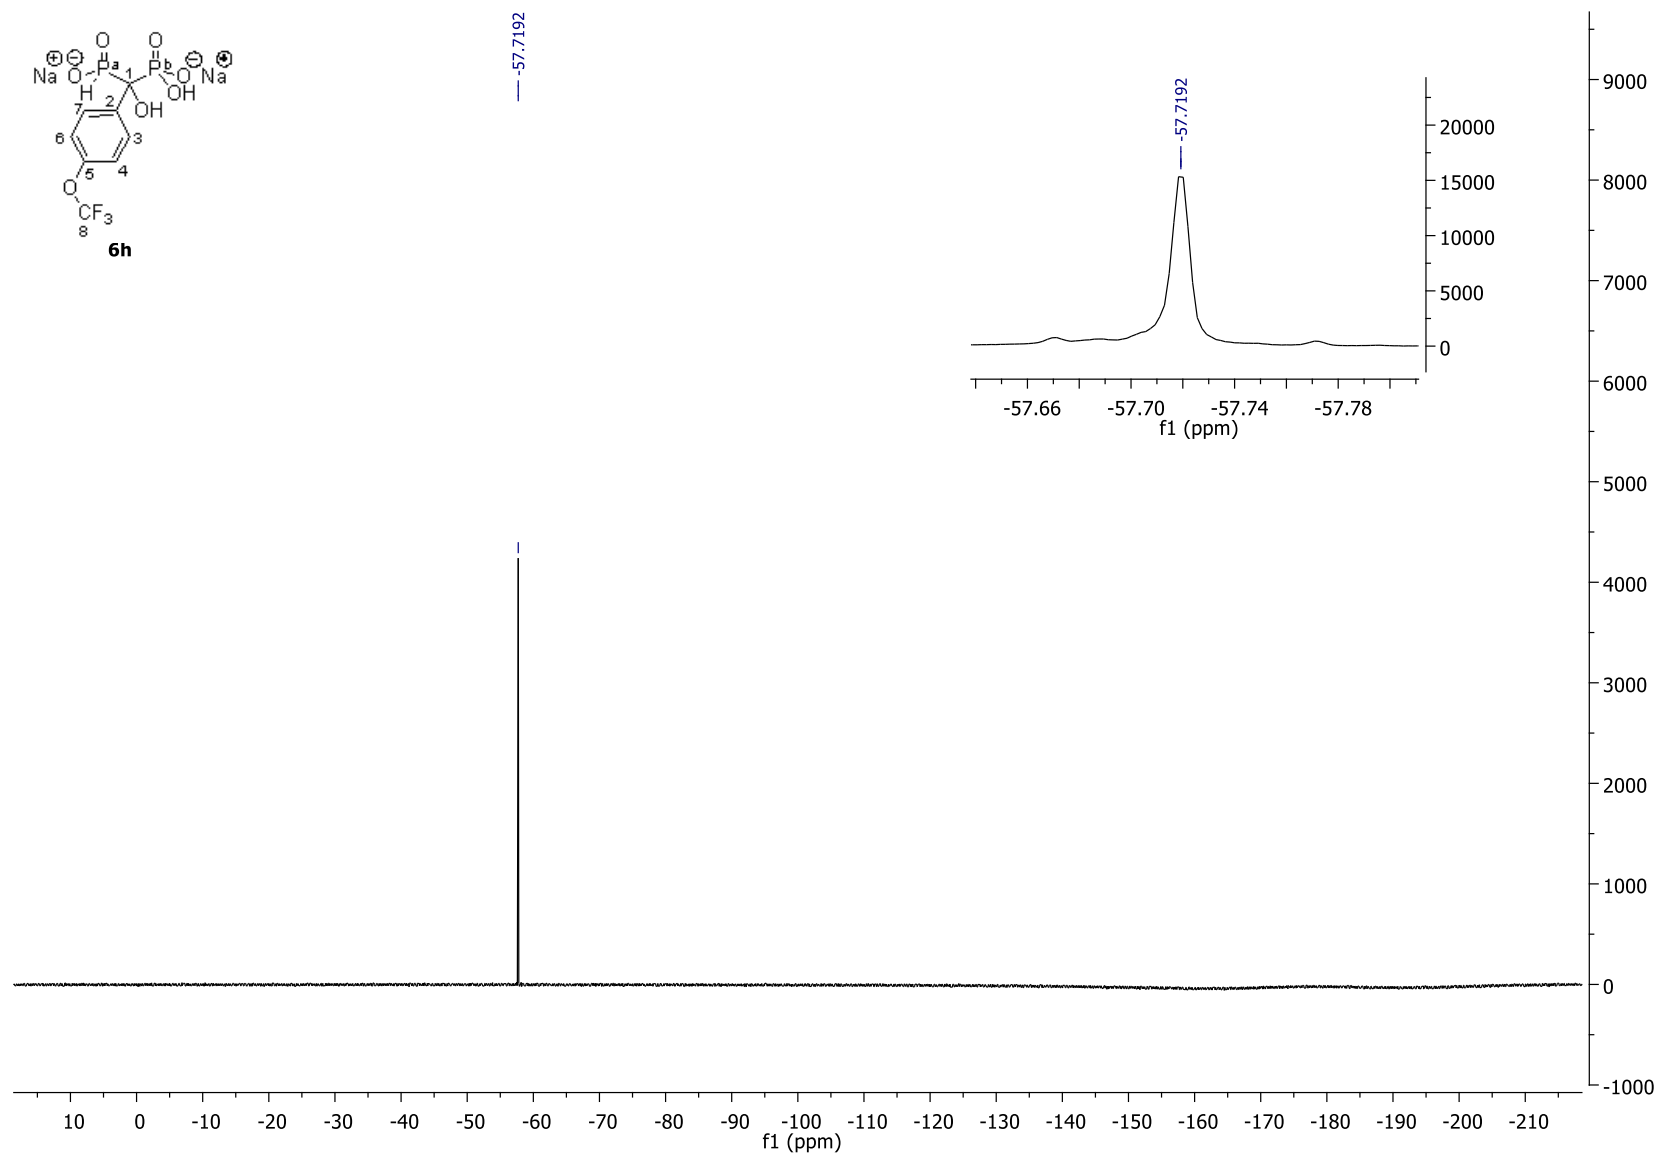

Figure S24:  $^{19}\text{F}$   $\{^1\text{H}\}$  and  $^{19}\text{F}$  (377 MHz,  $\text{D}_2\text{O}$ ) spectra of 1-hydroxy-1-(4-trifluoromethoxyphenyl)methane-1,1-bis(*H*-phosphinylphosphonate) disodium salt **6h**

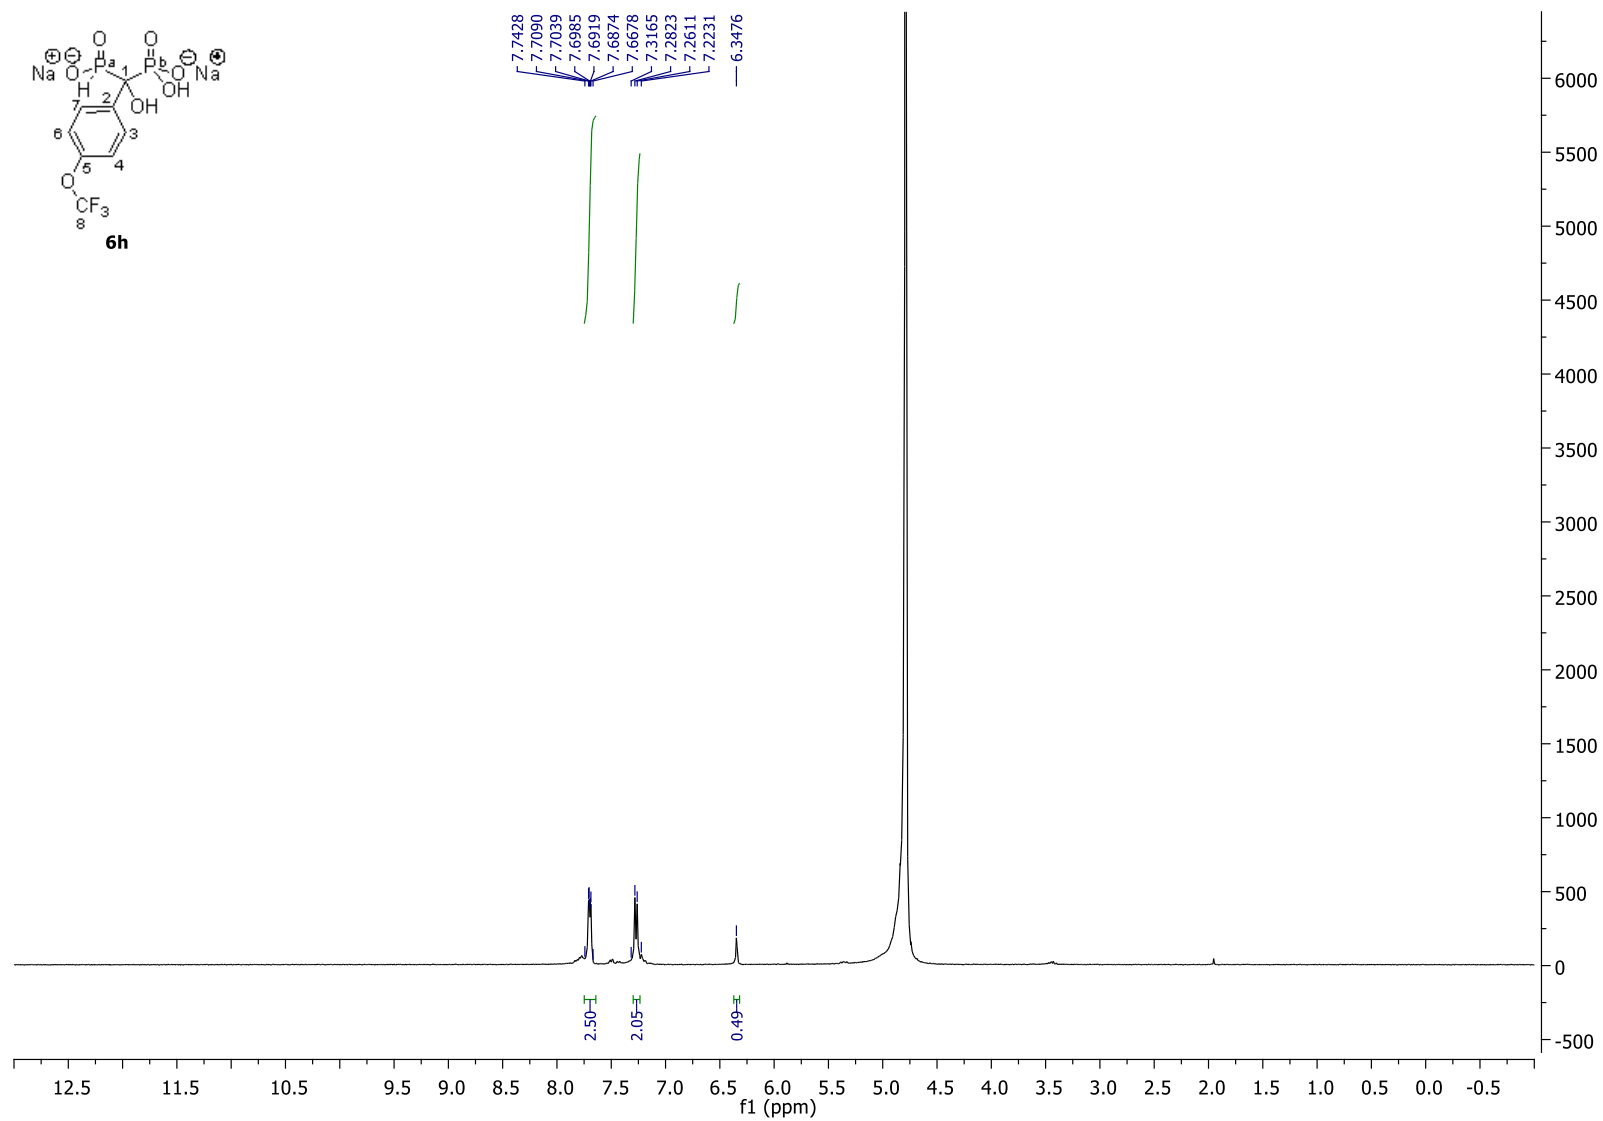

Figure S25: <sup>1</sup>H NMR spectrum (400 MHz, D<sub>2</sub>O) of 1-hydroxy-1-(4-trifluoromethoxyphenyl)methane-1,1-bis(*H*-phosphinylphosphonate) disodium salt **6h**

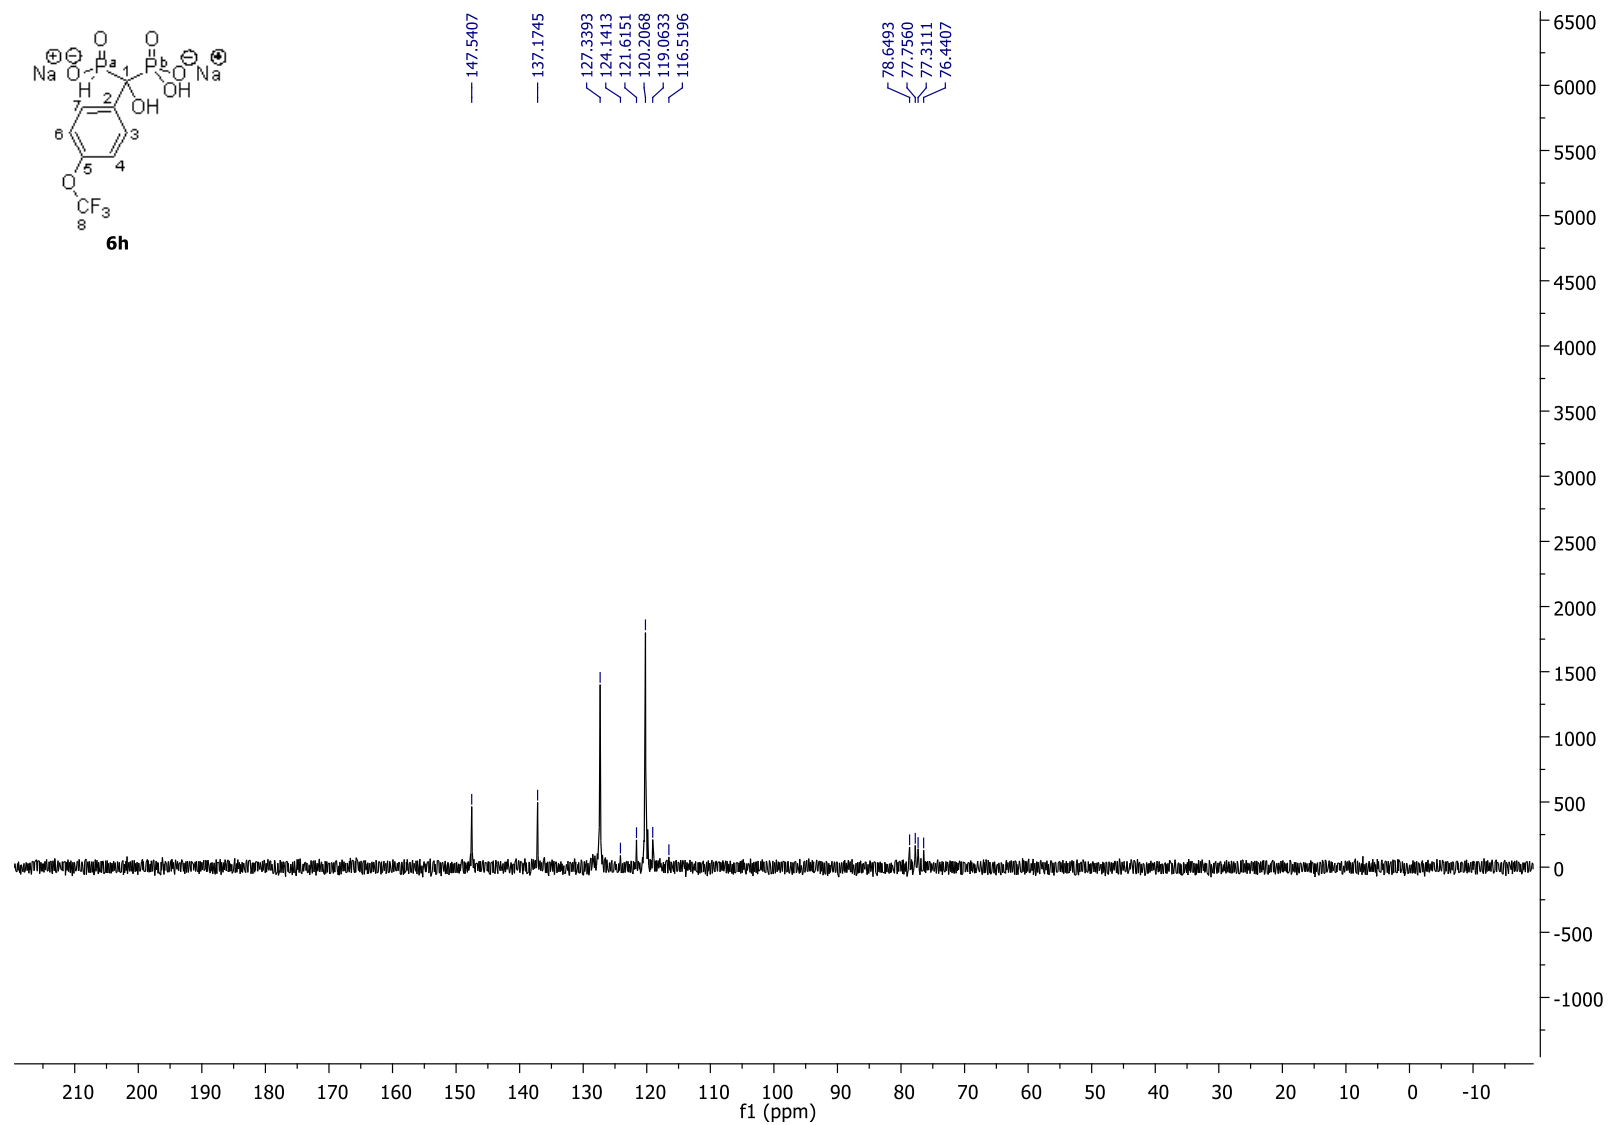

Figure S26:  $^{13}\text{C}$  NMR (101 MHz,  $\text{D}_2\text{O}$ ) spectrum of 1-hydroxy-1-(4-trifluoromethoxyphenyl)methane-1,1-bis(*H*-phosphinylphosphonate) disodium salt **6h**

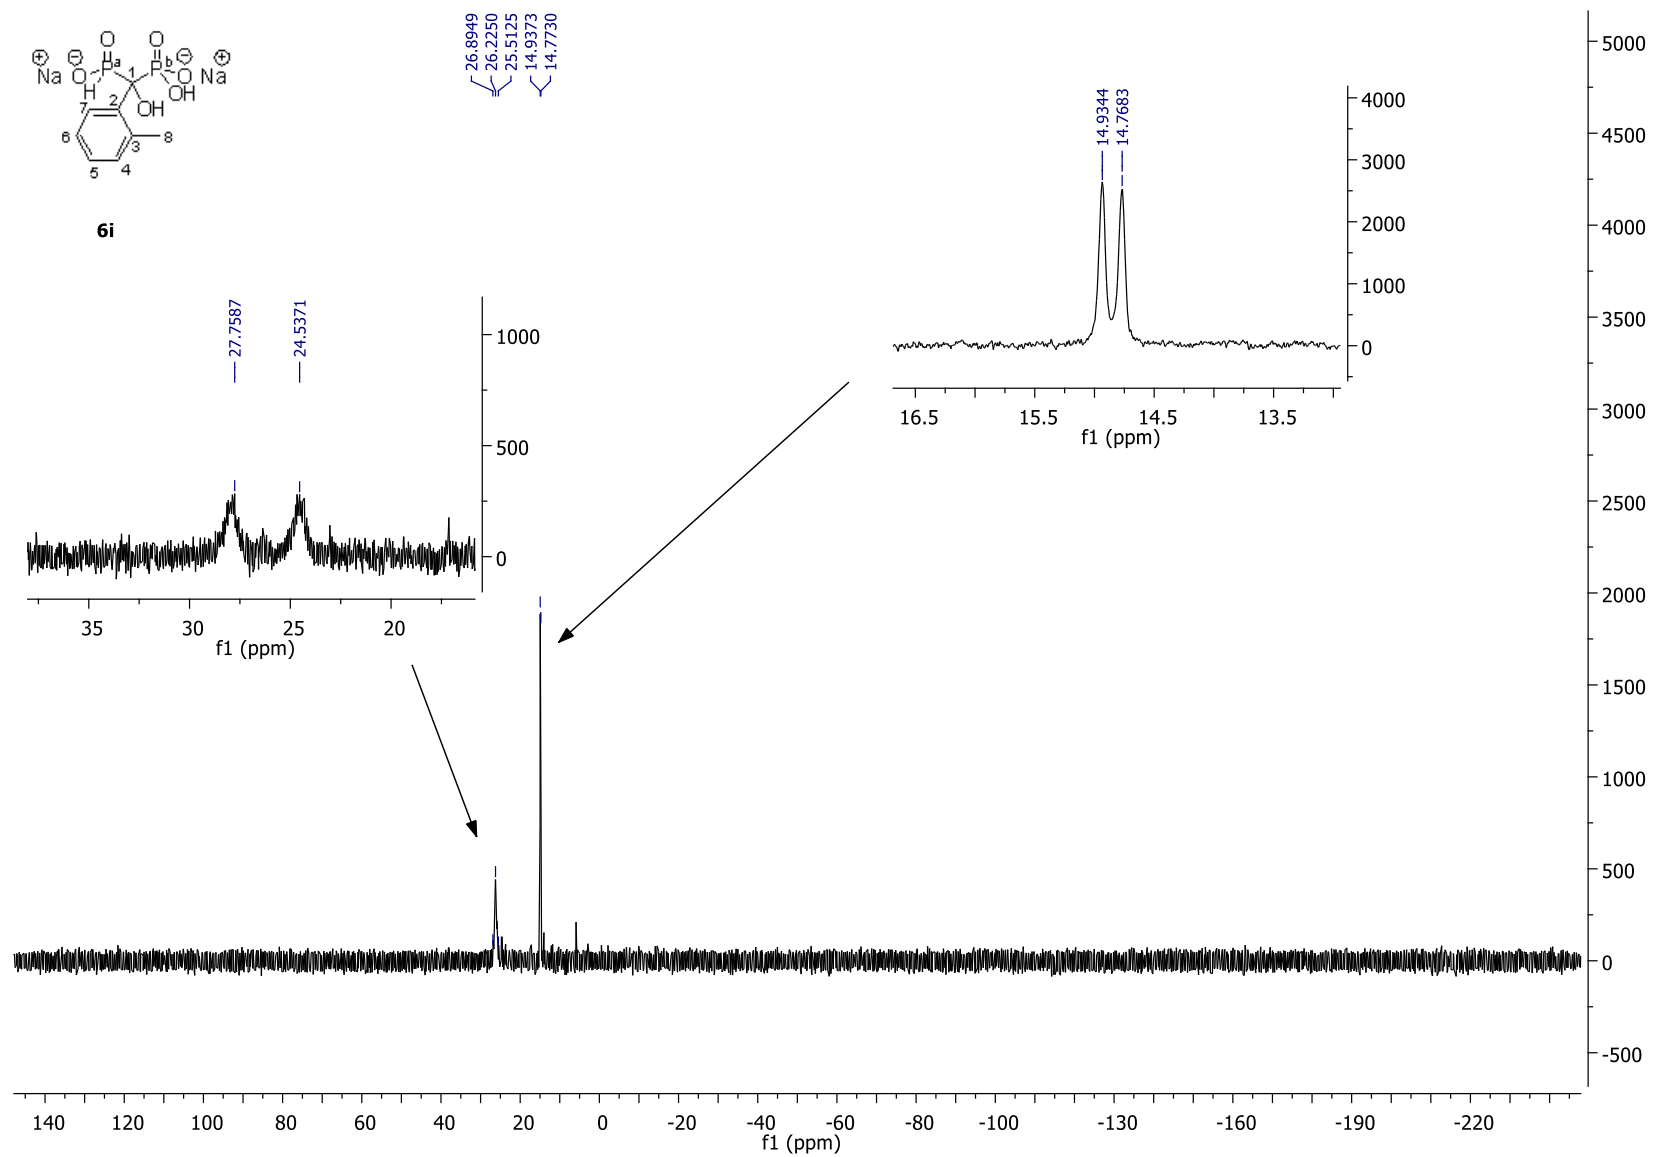

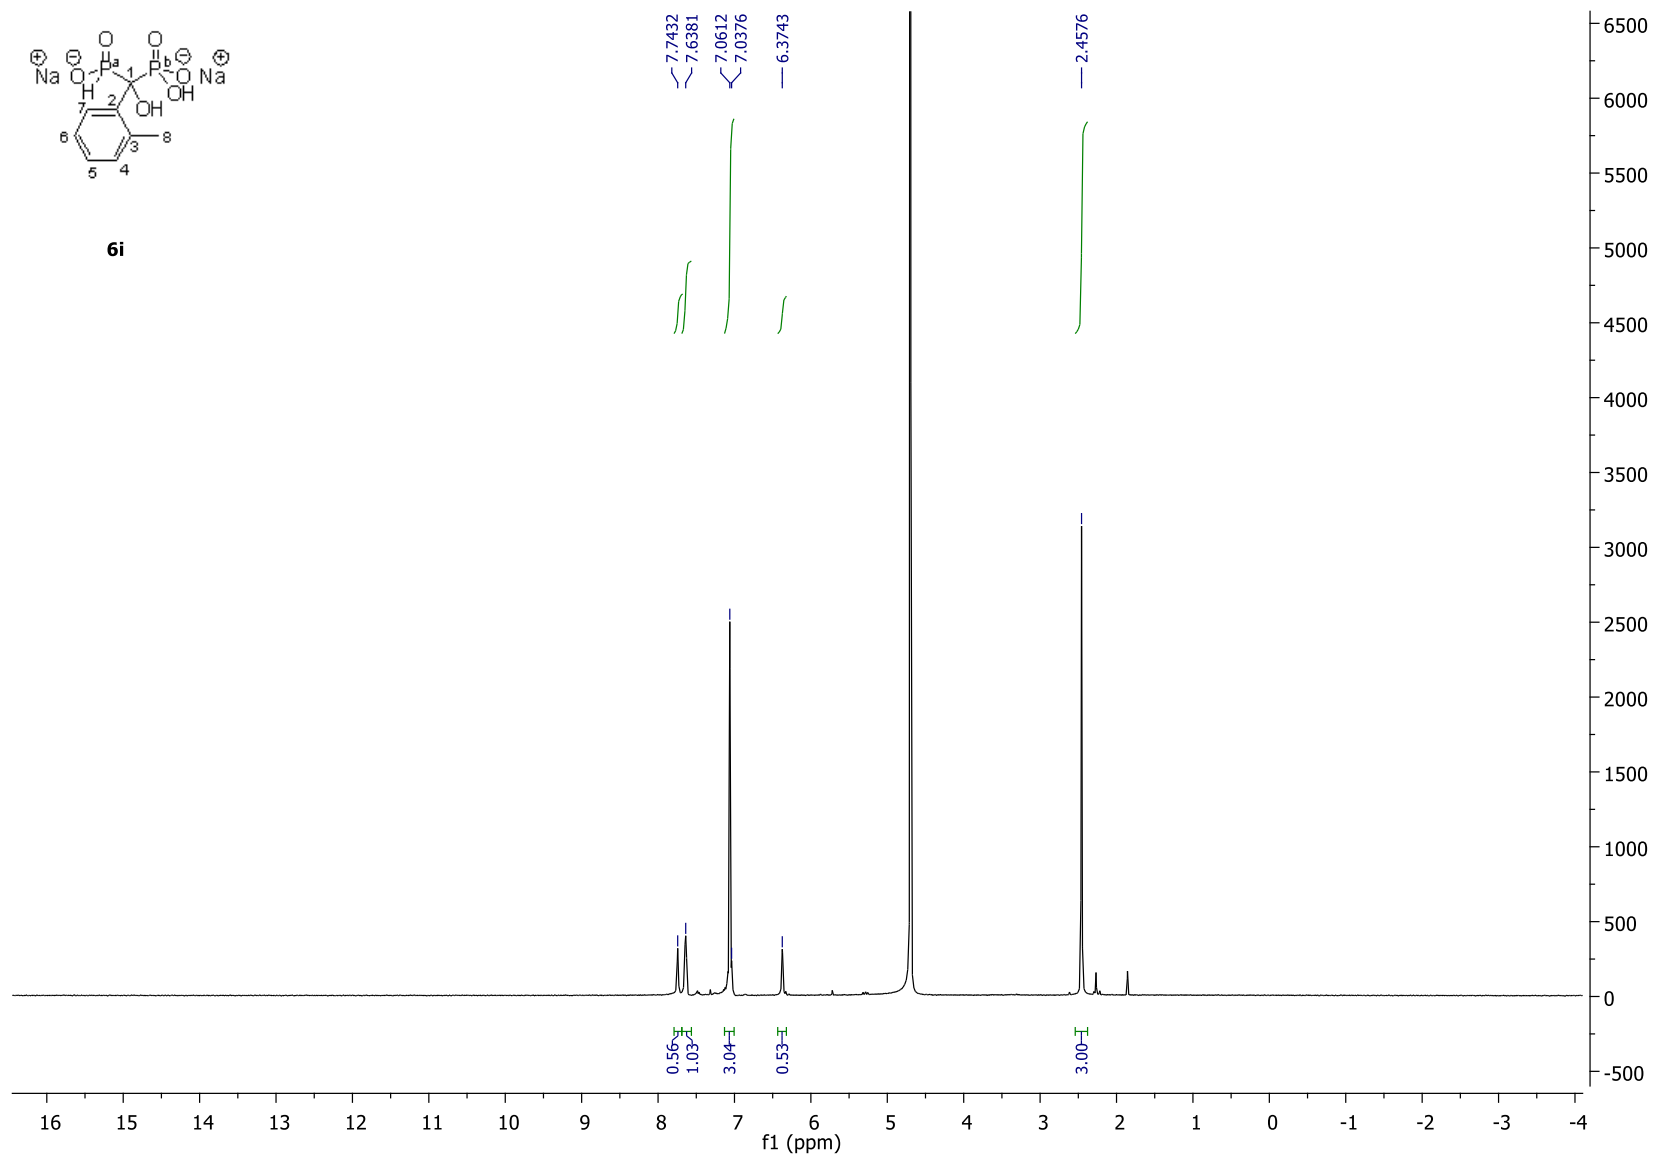

Figure S28:  $^1\text{H}$  NMR (400 MHz,  $\text{D}_2\text{O}$ ) spectrum of 1-hydroxy-1-(2-tolyl)methane-1,1-bis(*H*-phosphonate) disodium salt **6i**

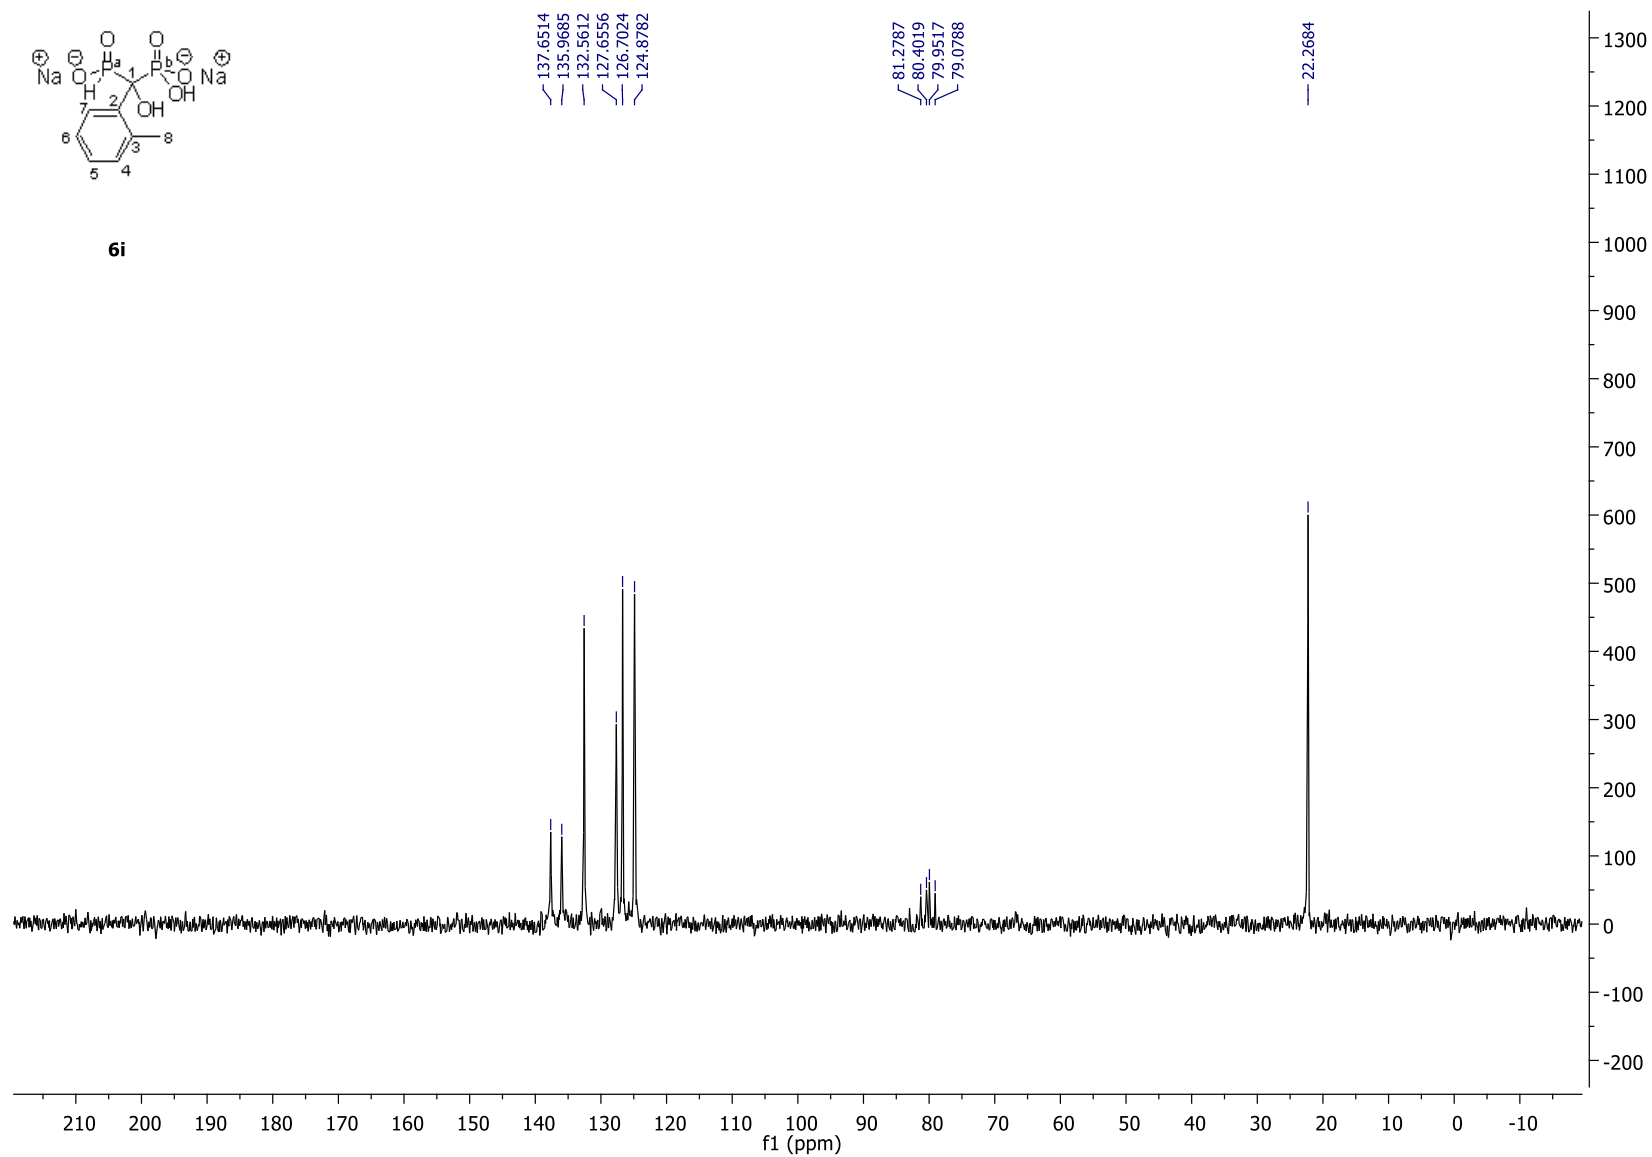

Figure S29: <sup>13</sup>C NMR (101 MHz, D<sub>2</sub>O) spectrum of 1-hydroxy-1-(2-tolyl)methane-1,1-bis(*H*-phosphonate) disodium salt **6i**

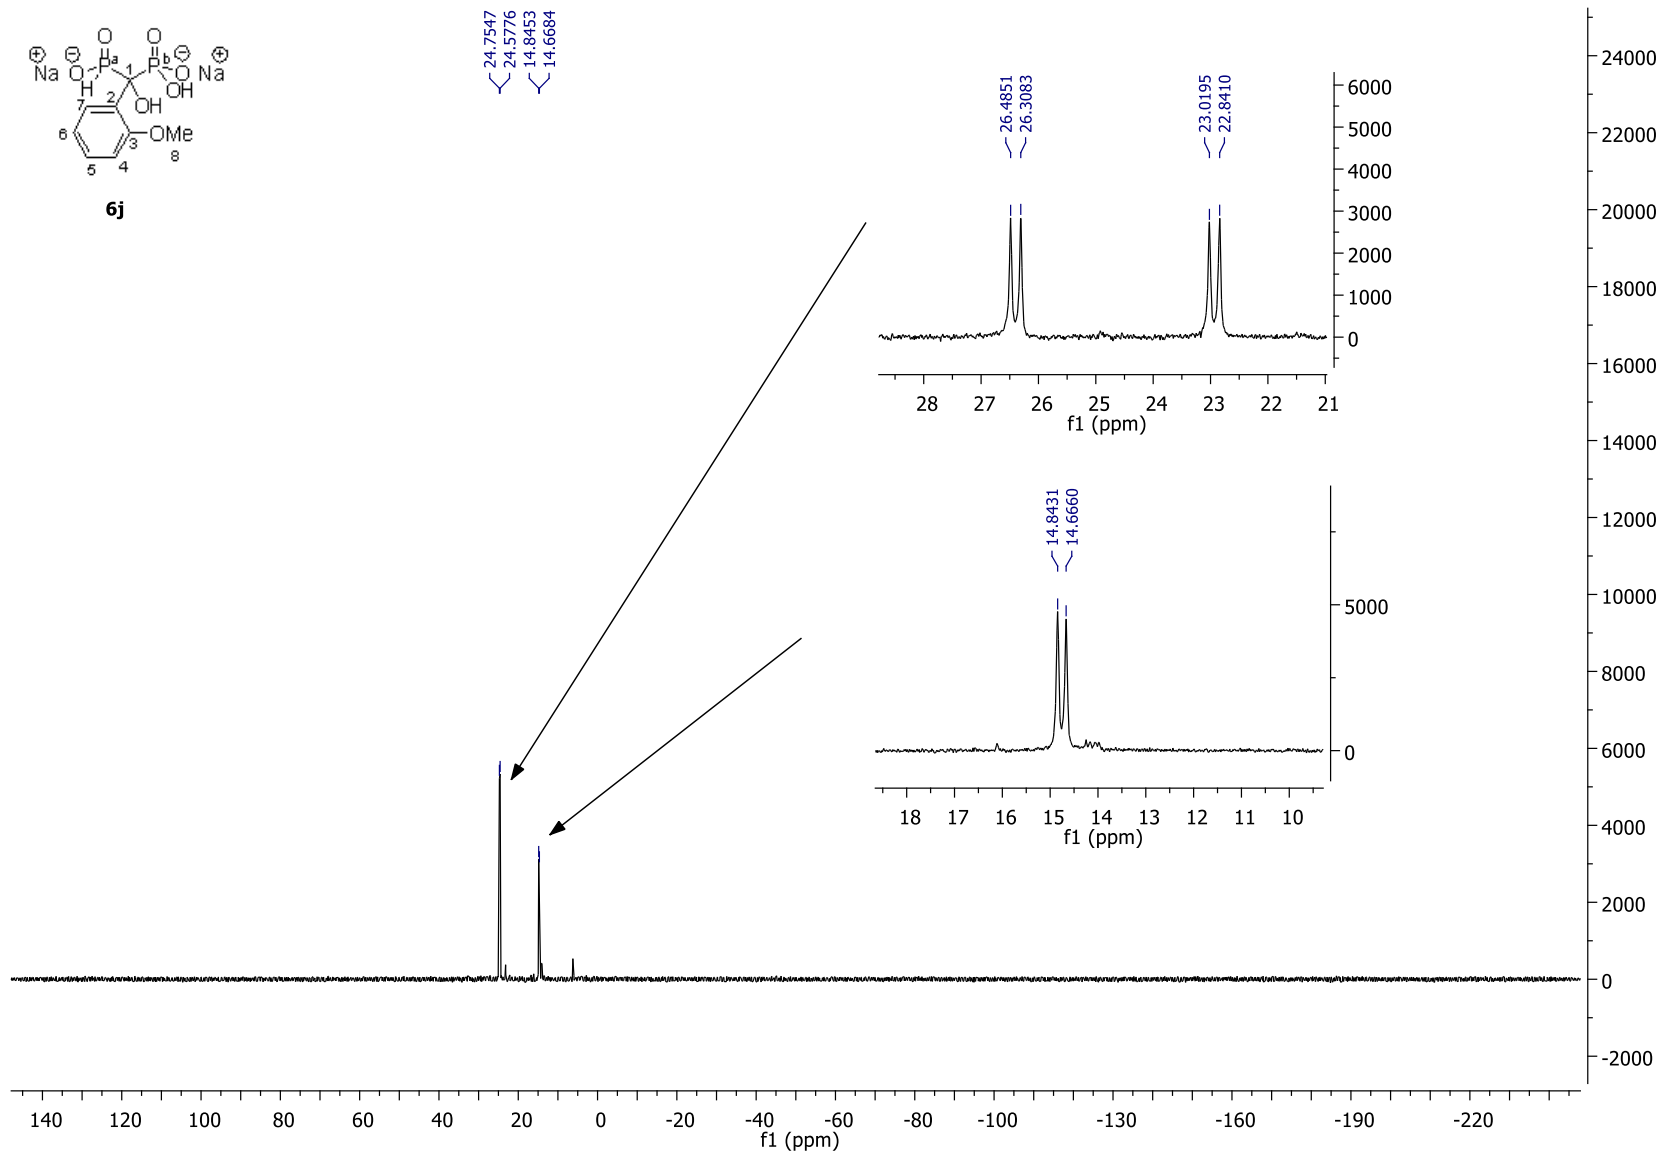

Figure S30: <sup>31</sup>P{<sup>1</sup>H} and <sup>31</sup>P NMR (162 MHz, D<sub>2</sub>O) spectra of 1-hydroxy-1-(2-methoxyphenyl)methane-1,1-bis(*H*-phosphinylphosphonate) disodium salt **6j**

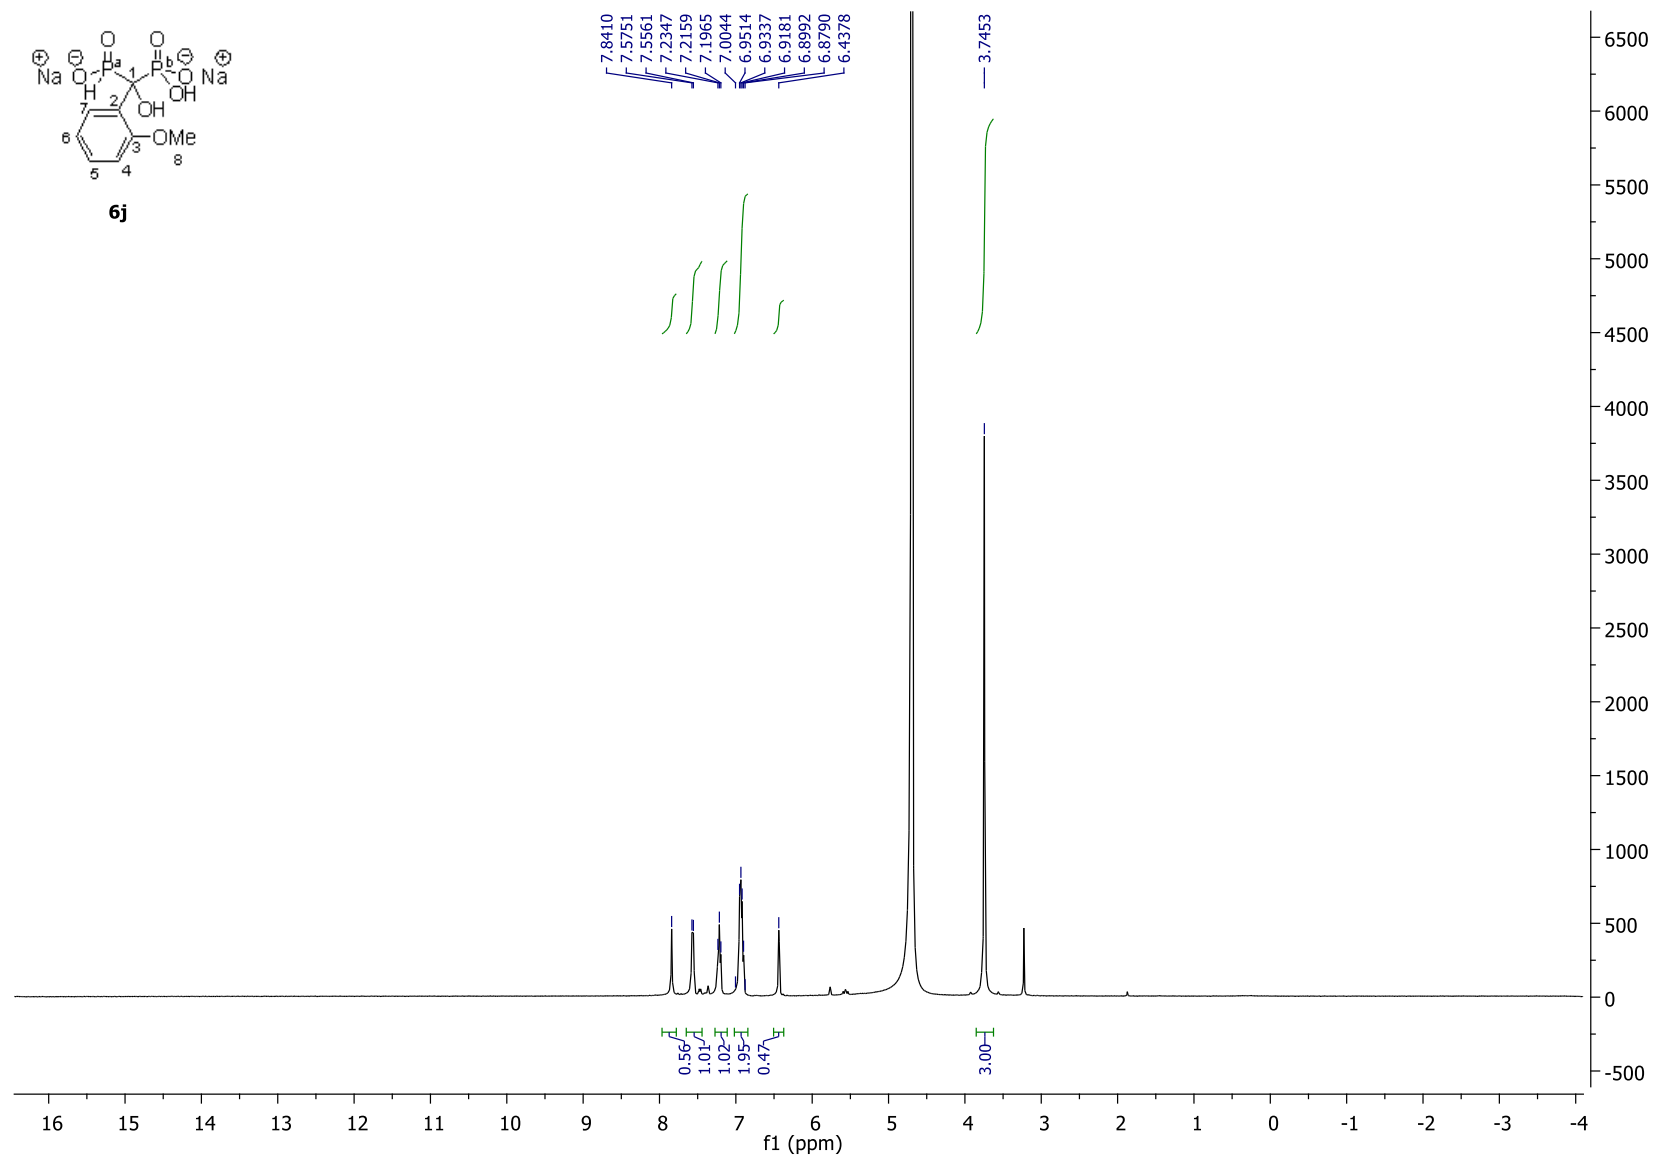

Figure S31: <sup>1</sup>H NMR (400 MHz, D<sub>2</sub>O) spectrum of 1-hydroxy-1-(2-methoxyphenyl)methane-1,1-bis(*H*-phosphinylphosphonate) disodium salt **6j**



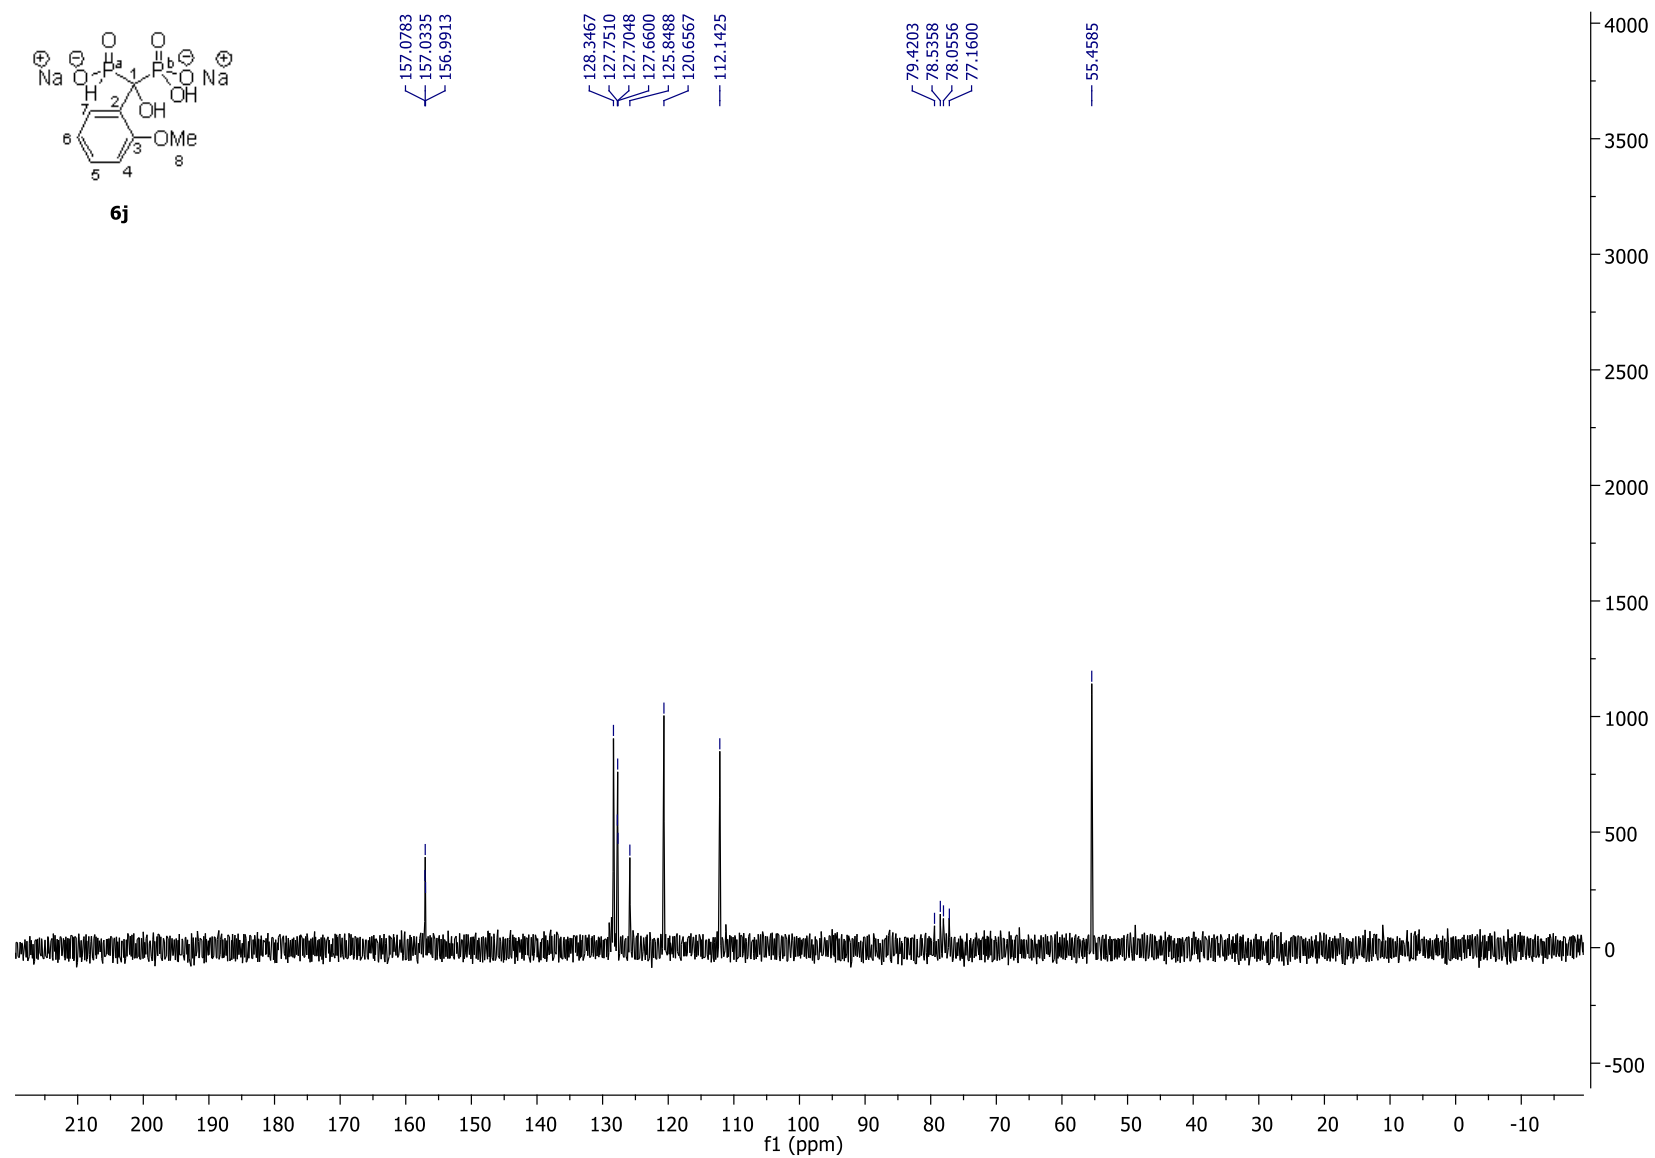

Figure S32: <sup>13</sup>C NMR spectrum (101 MHz, D<sub>2</sub>O) of 1-hydroxy-1-(2-methoxyphenyl)methane-1,1-bis(*H*-phosphinylphosphonate) disodium salt **6j**

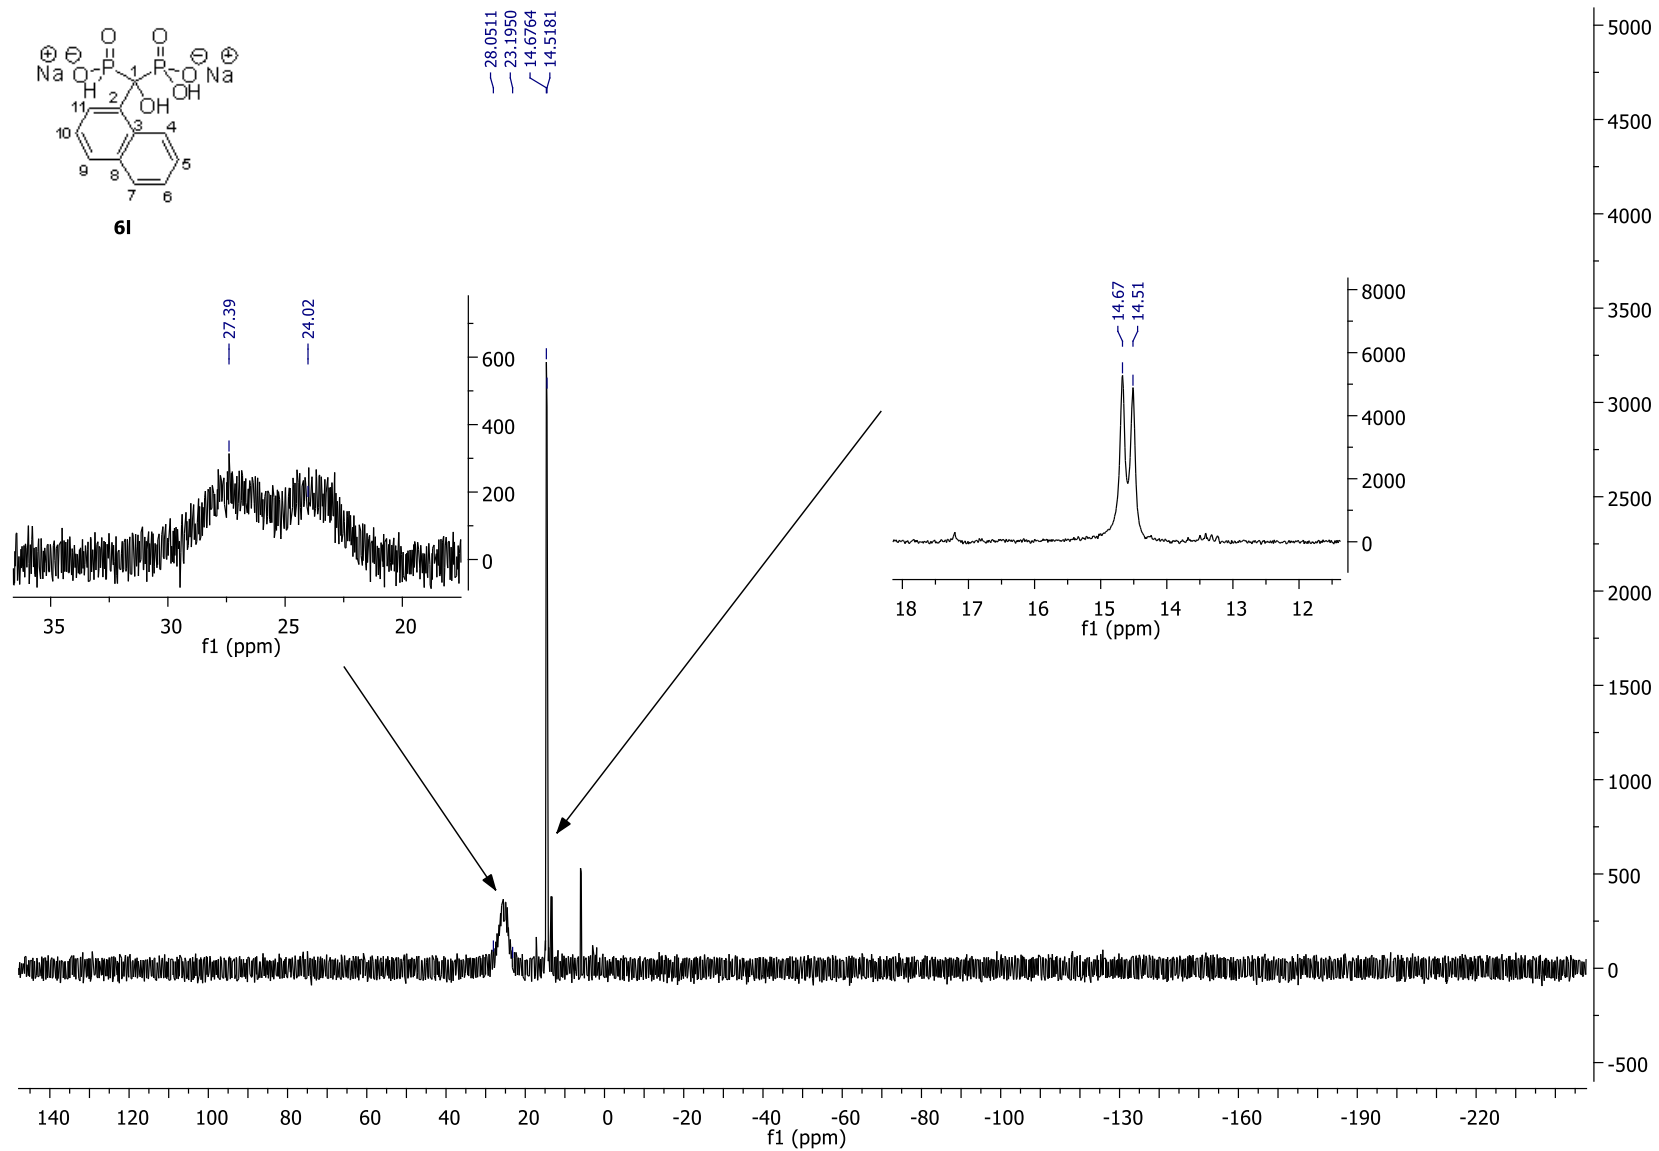

Figure S33:  $^{31}\text{P}\{^1\text{H}\}$  and  $^{31}\text{P}$  NMR (162 MHz,  $\text{D}_2\text{O}$ ) spectra of 1-hydroxy-1-(1-naphthyl)methane-1,1-bis(*H*-phosphinylphosphonate) disodium salt **6I**

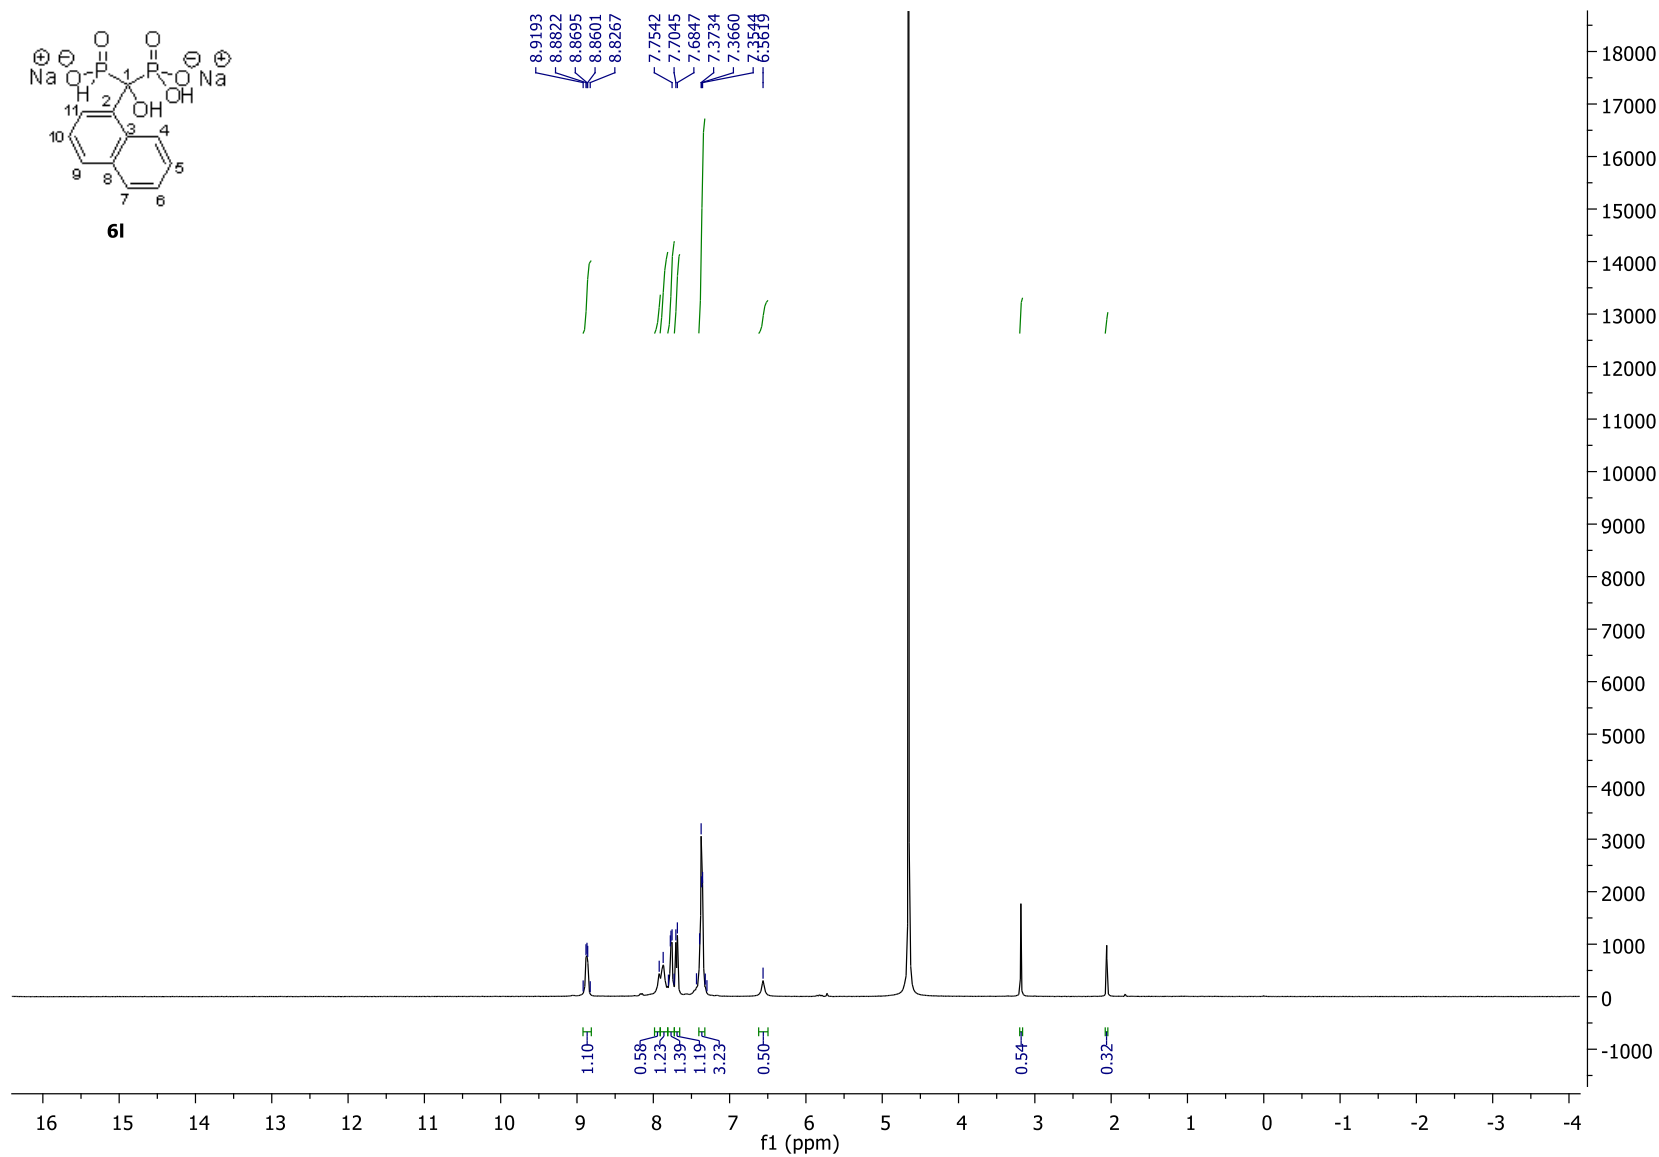

Figure S34:  $^1\text{H}$  NMR (400 MHz,  $\text{D}_2\text{O}$ ) spectrum of 1-hydroxy-1-(1-naphthyl)methane-1,1-bis(*H*-phosphinylphosphonate) disodium salt **6I**

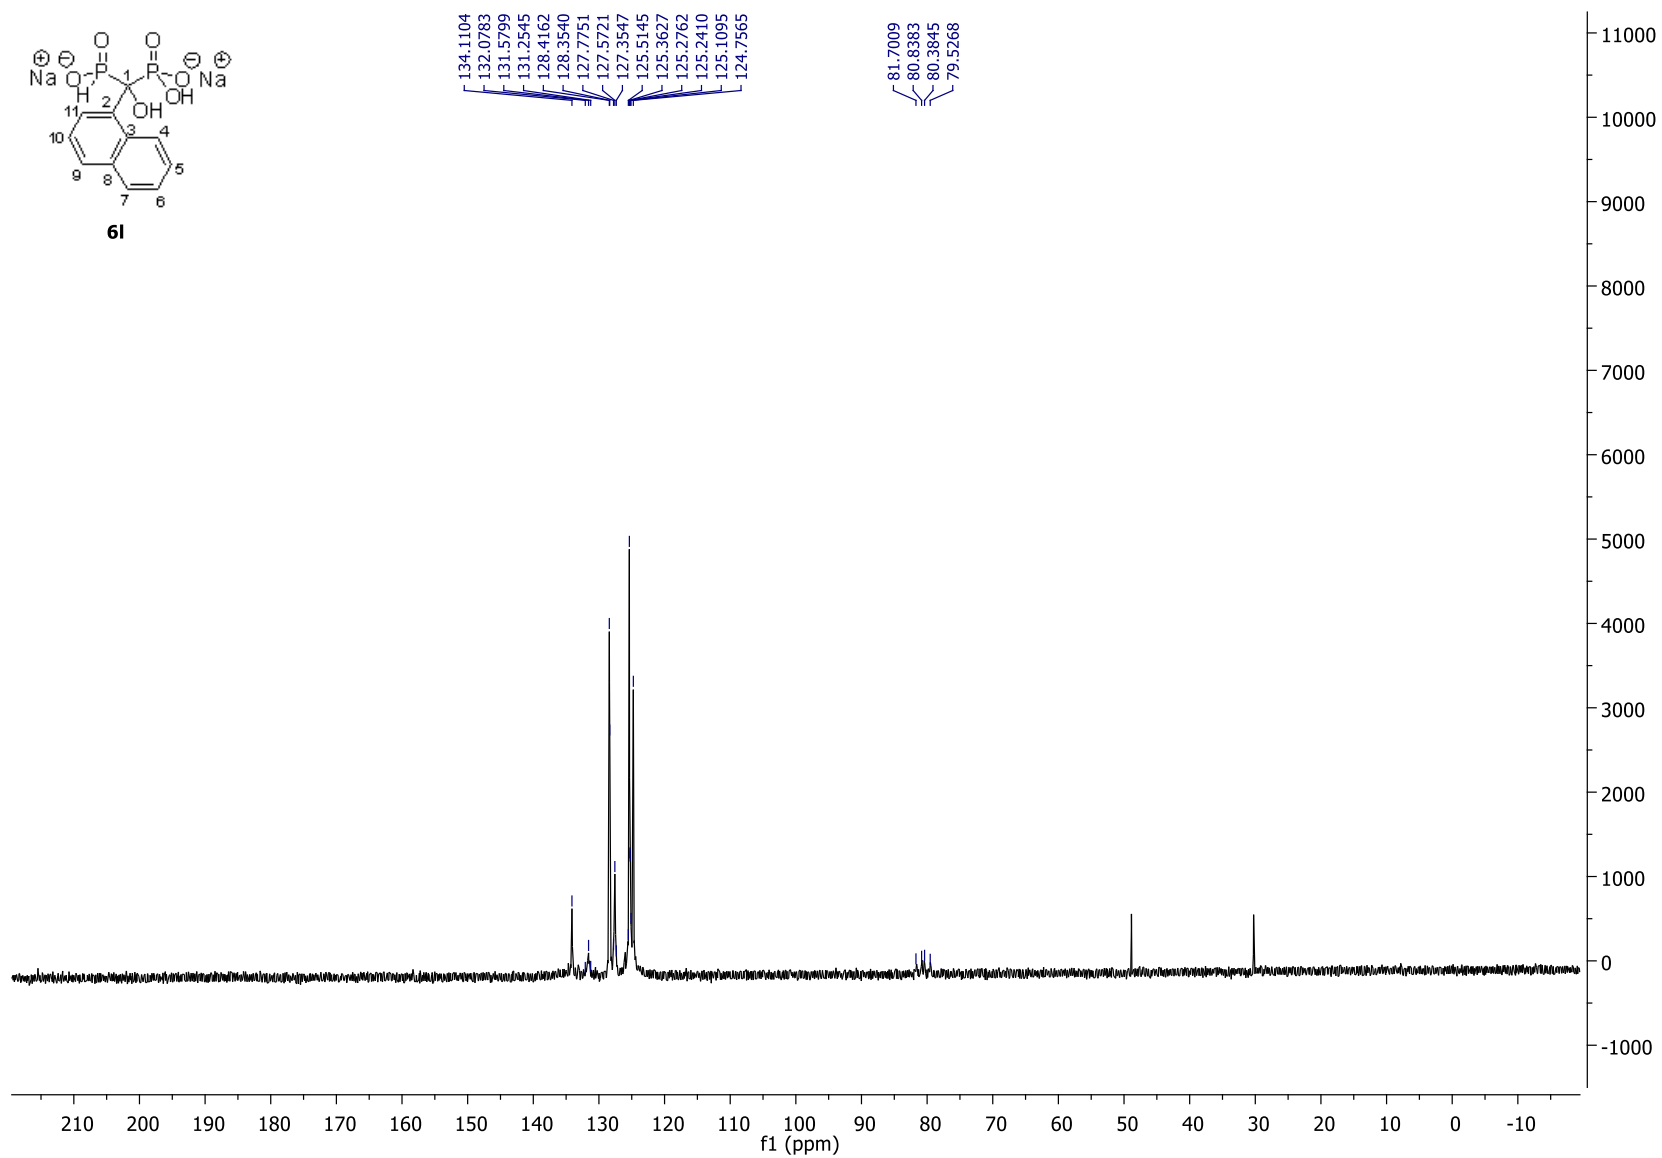

Figure S35:  $^{13}\text{C}$  NMR spectrum (101 MHz,  $\text{D}_2\text{O}$ ) of 1-hydroxy-1-(1-naphthyl)methane-1,1-bis(*H*-phosphinylphosphonate) disodium salt **6l**

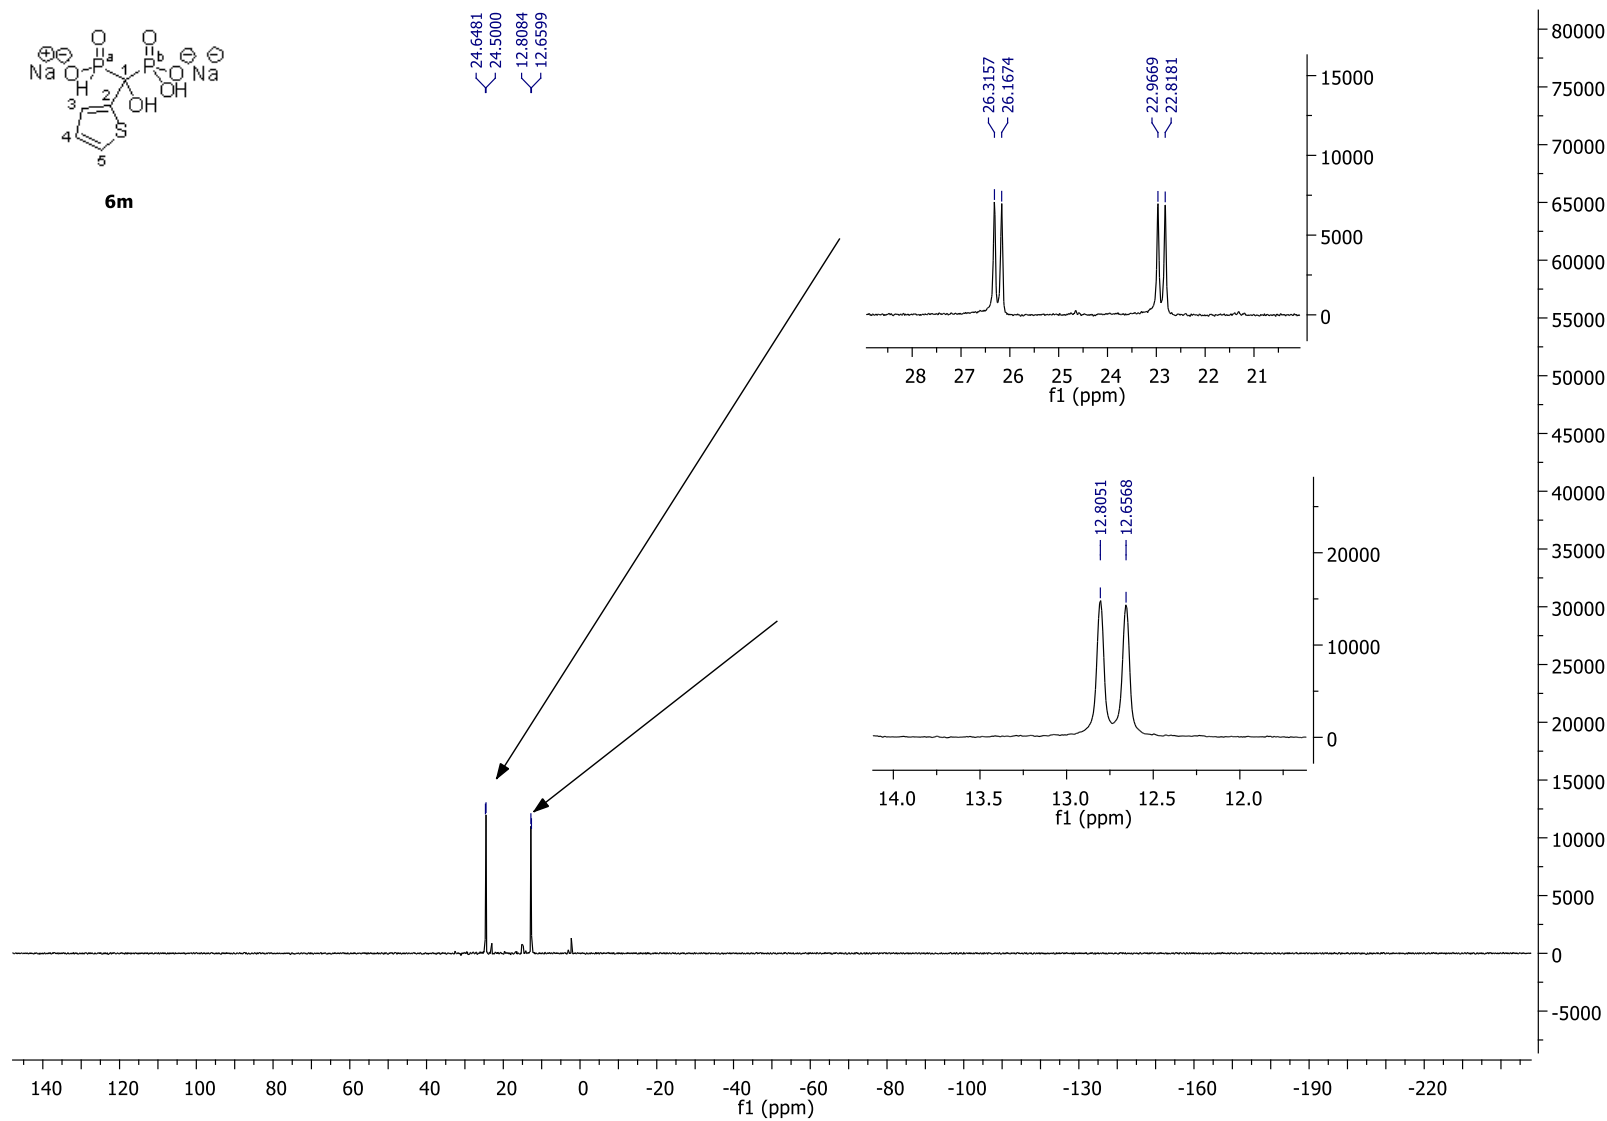

Figure S36:  $^{31}\text{P}\{^1\text{H}\}$  and  $^{31}\text{P}$  NMR (162 MHz,  $\text{D}_2\text{O}$ ) spectra of 1-hydroxy-1-(2-thienyl)methane-1,1-bis(*H*-phosphinylphosphonate) disodium salt **6m**

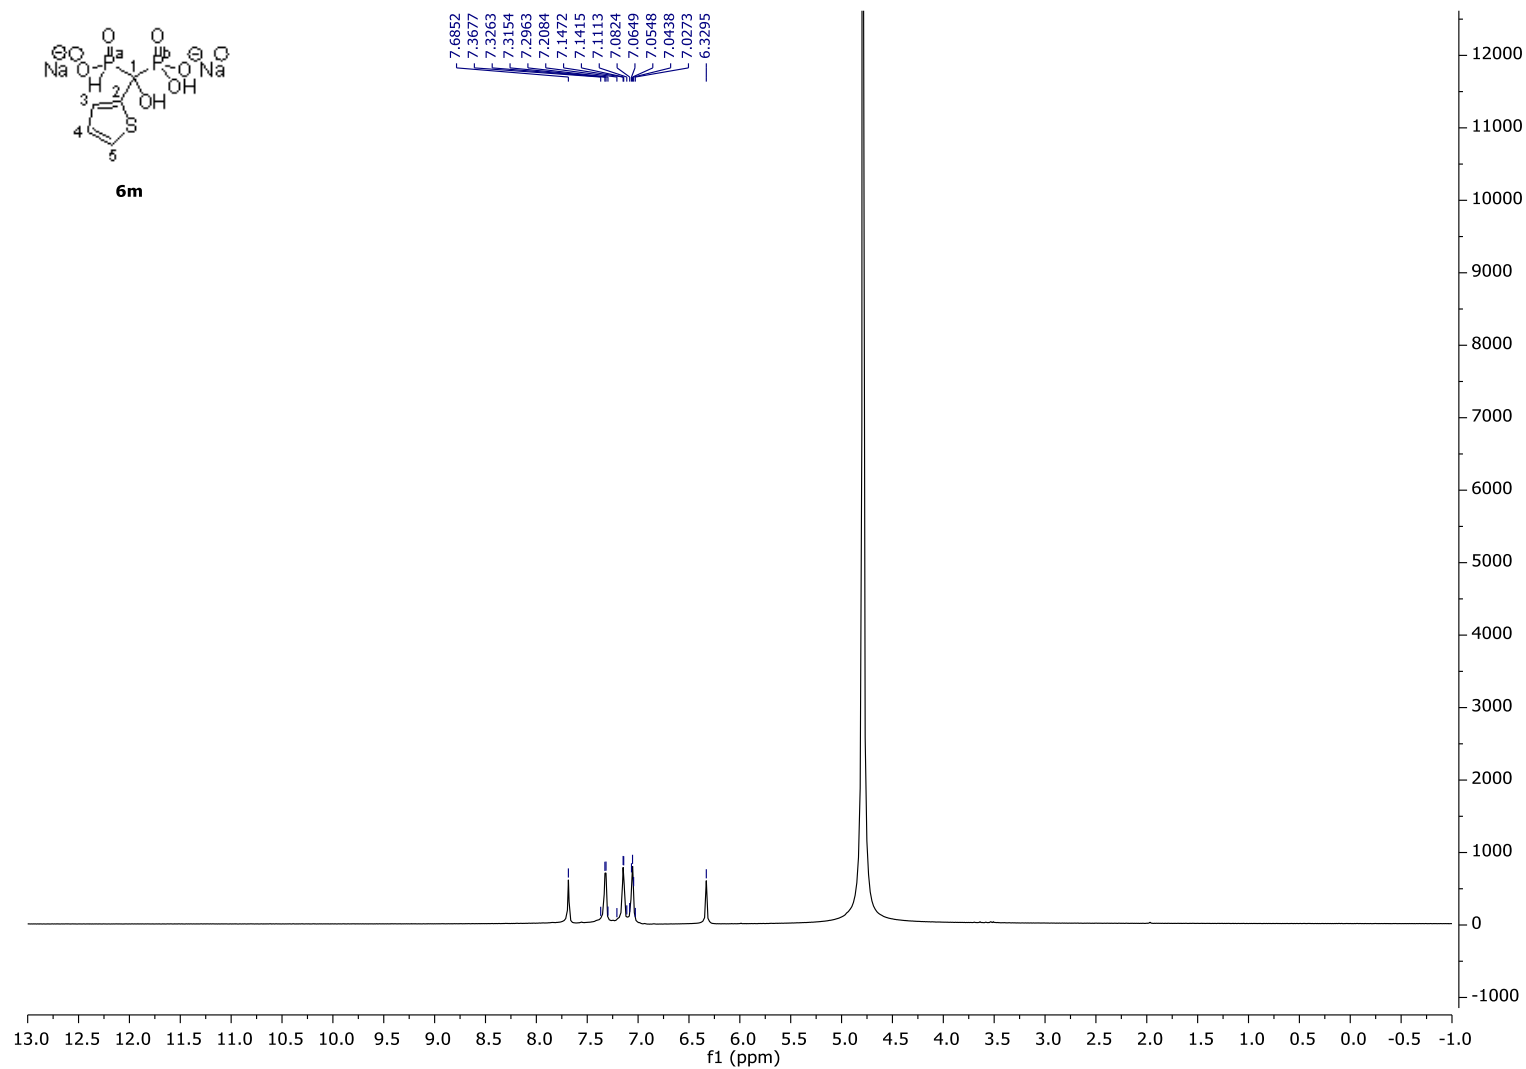

Figure S37:  $^1\text{H}$  NMR (400 MHz,  $\text{D}_2\text{O}$ ) spectrum of 1-hydroxy-1-(2-thienyl)methane-1,1-bis(*H*-phosphinylphosphonate) disodium salt **6m**

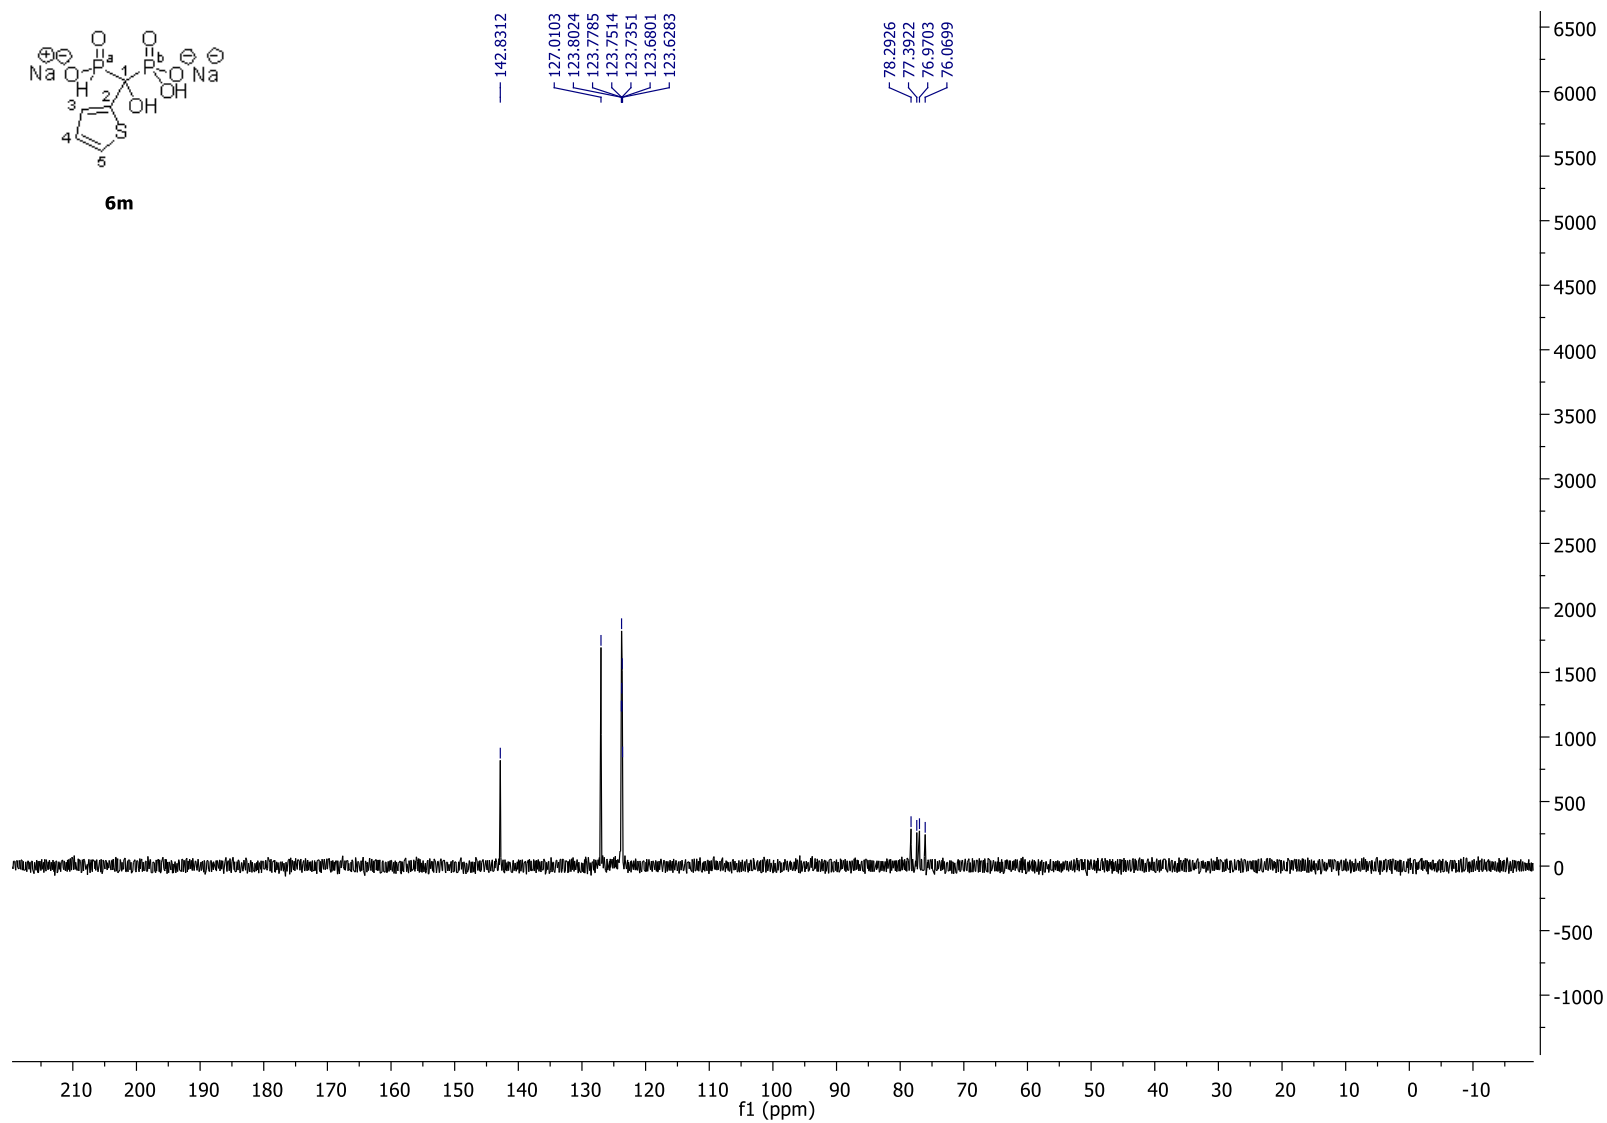

Figure S38: <sup>13</sup>C NMR (101 MHz, D<sub>2</sub>O) spectrum of 1-hydroxy-1-(2-thienyl)methane-1,1-bis(*H*-phosphinylphosphonate) disodium salt **6m**

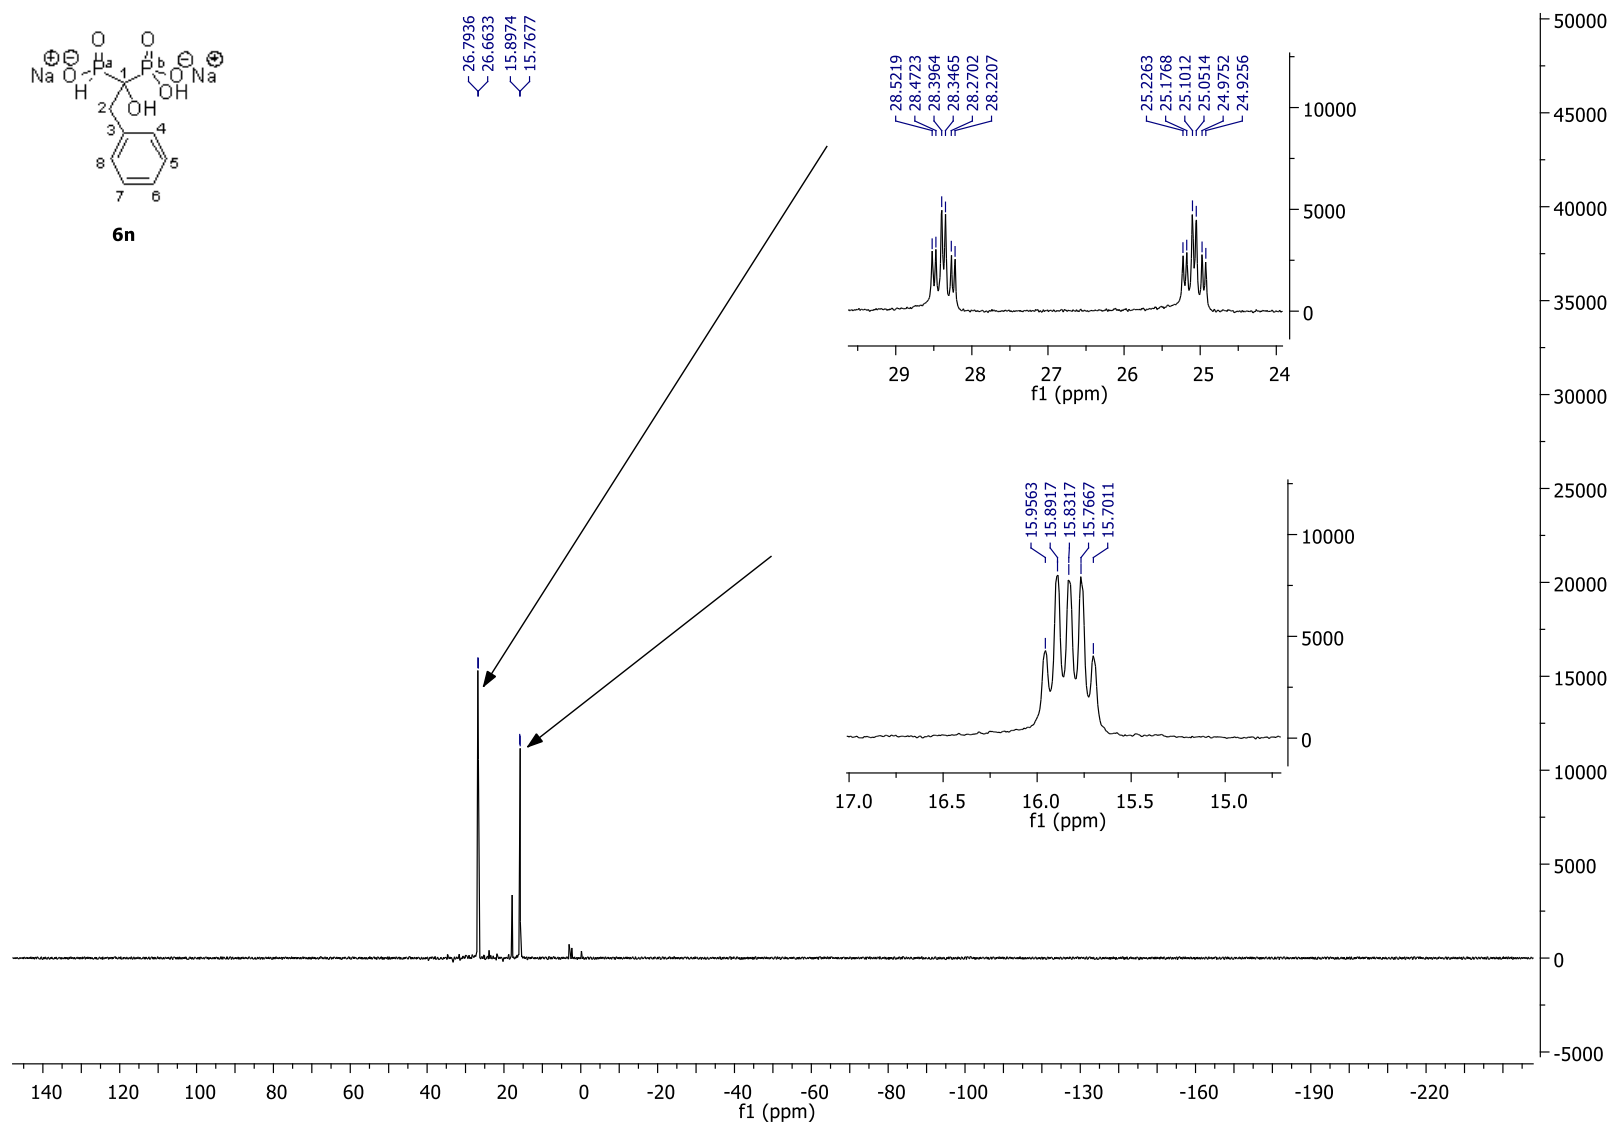



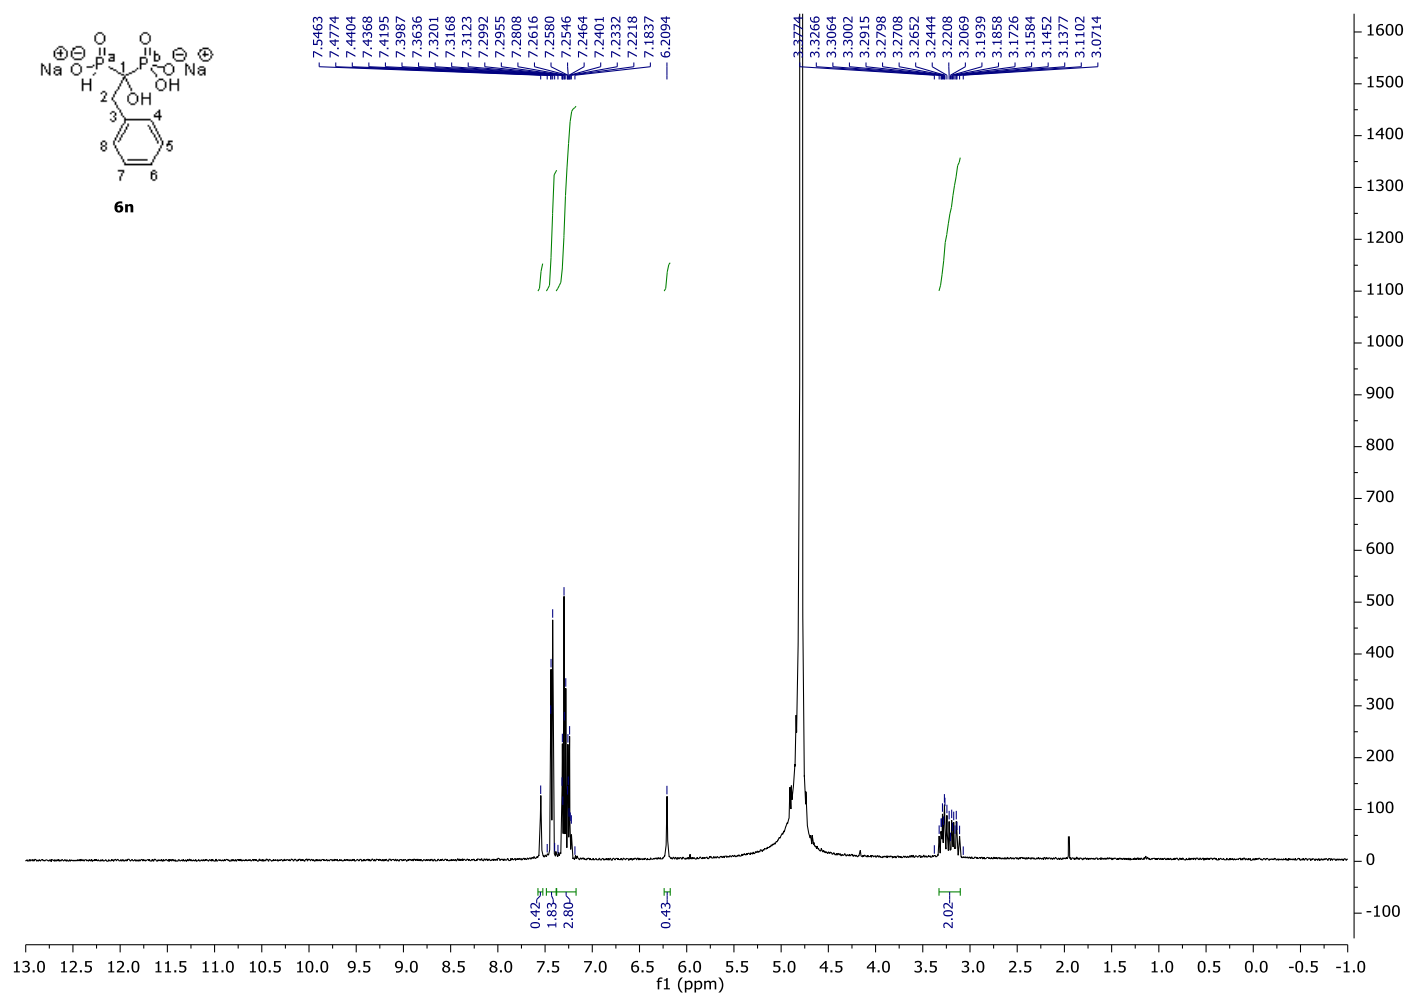

Figure S40: <sup>1</sup>H NMR (400 MHz, D<sub>2</sub>O) spectrum of 1-hydroxy-2-phenylethane-1,1-bis(*H*-phosphinylphosphonate) disodium salt **6n**

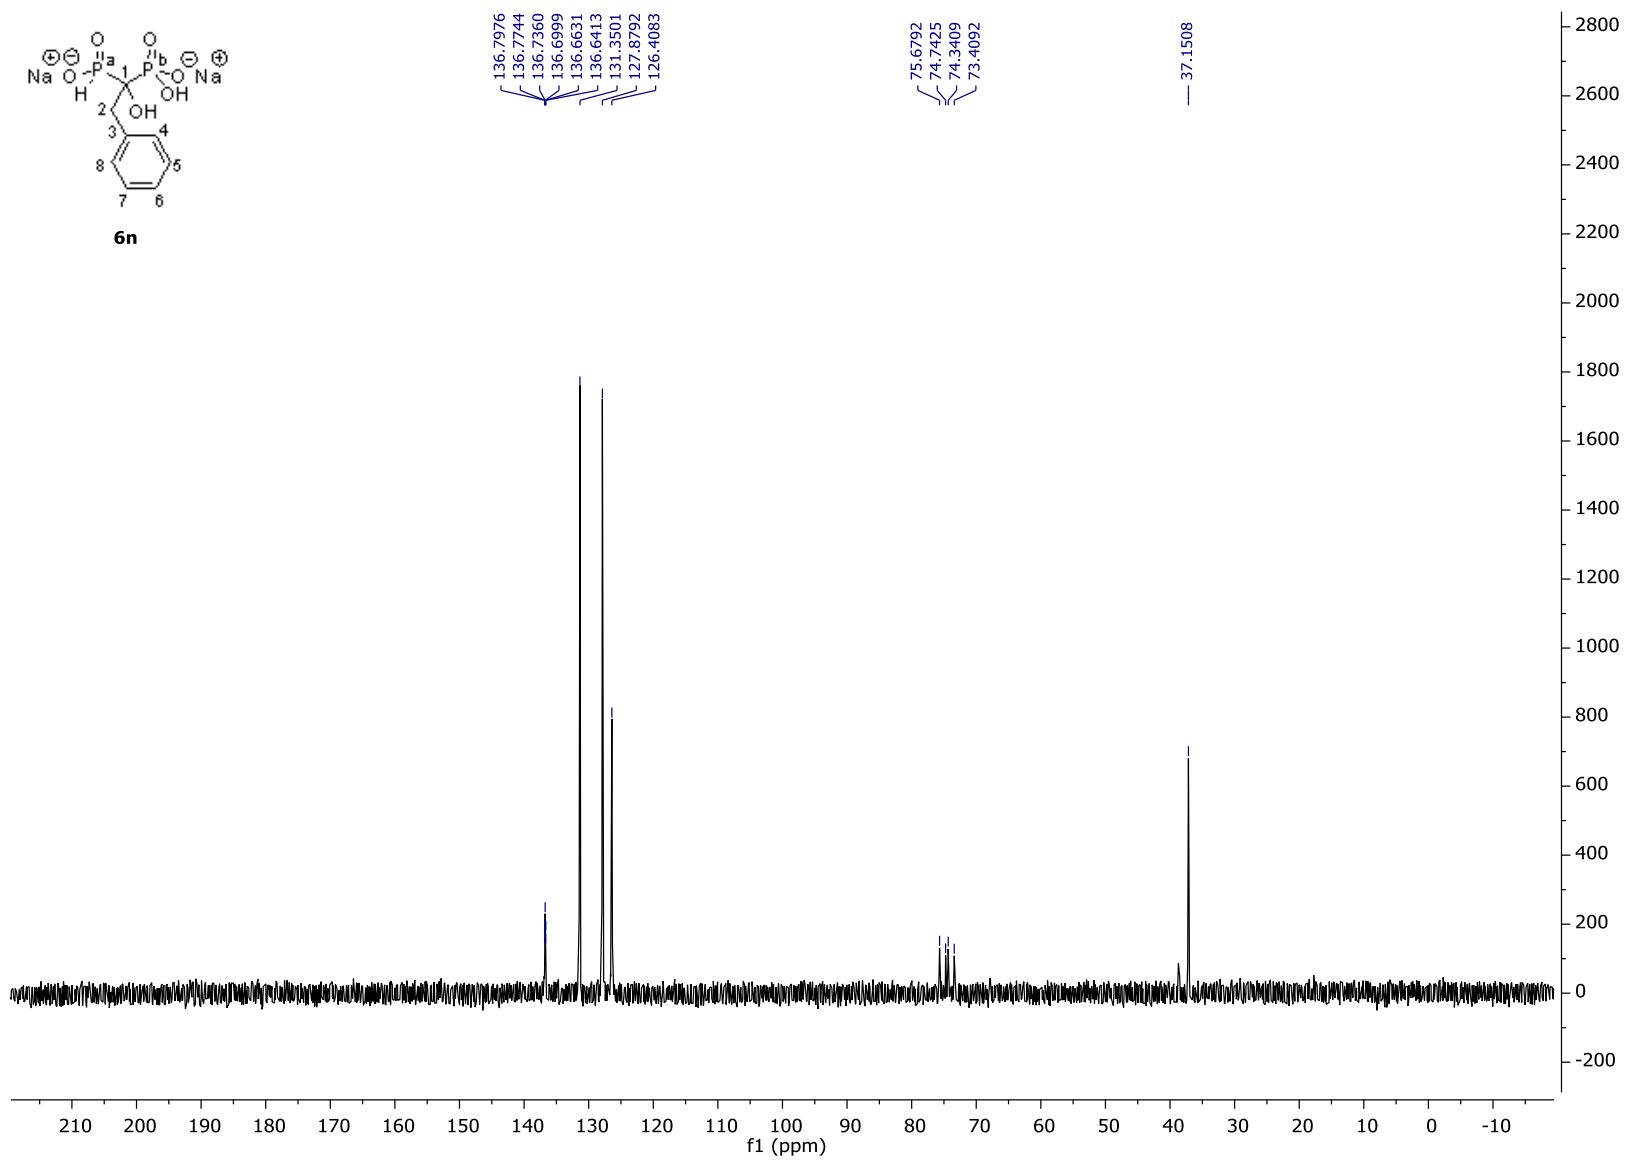

Figure S41: <sup>13</sup>C NMR (101 MHz, D<sub>2</sub>O) spectrum of 1-hydroxy-2-phenylethane-1,1-bis(*H*-phosphinylphosphonate) disodium salt **6n**

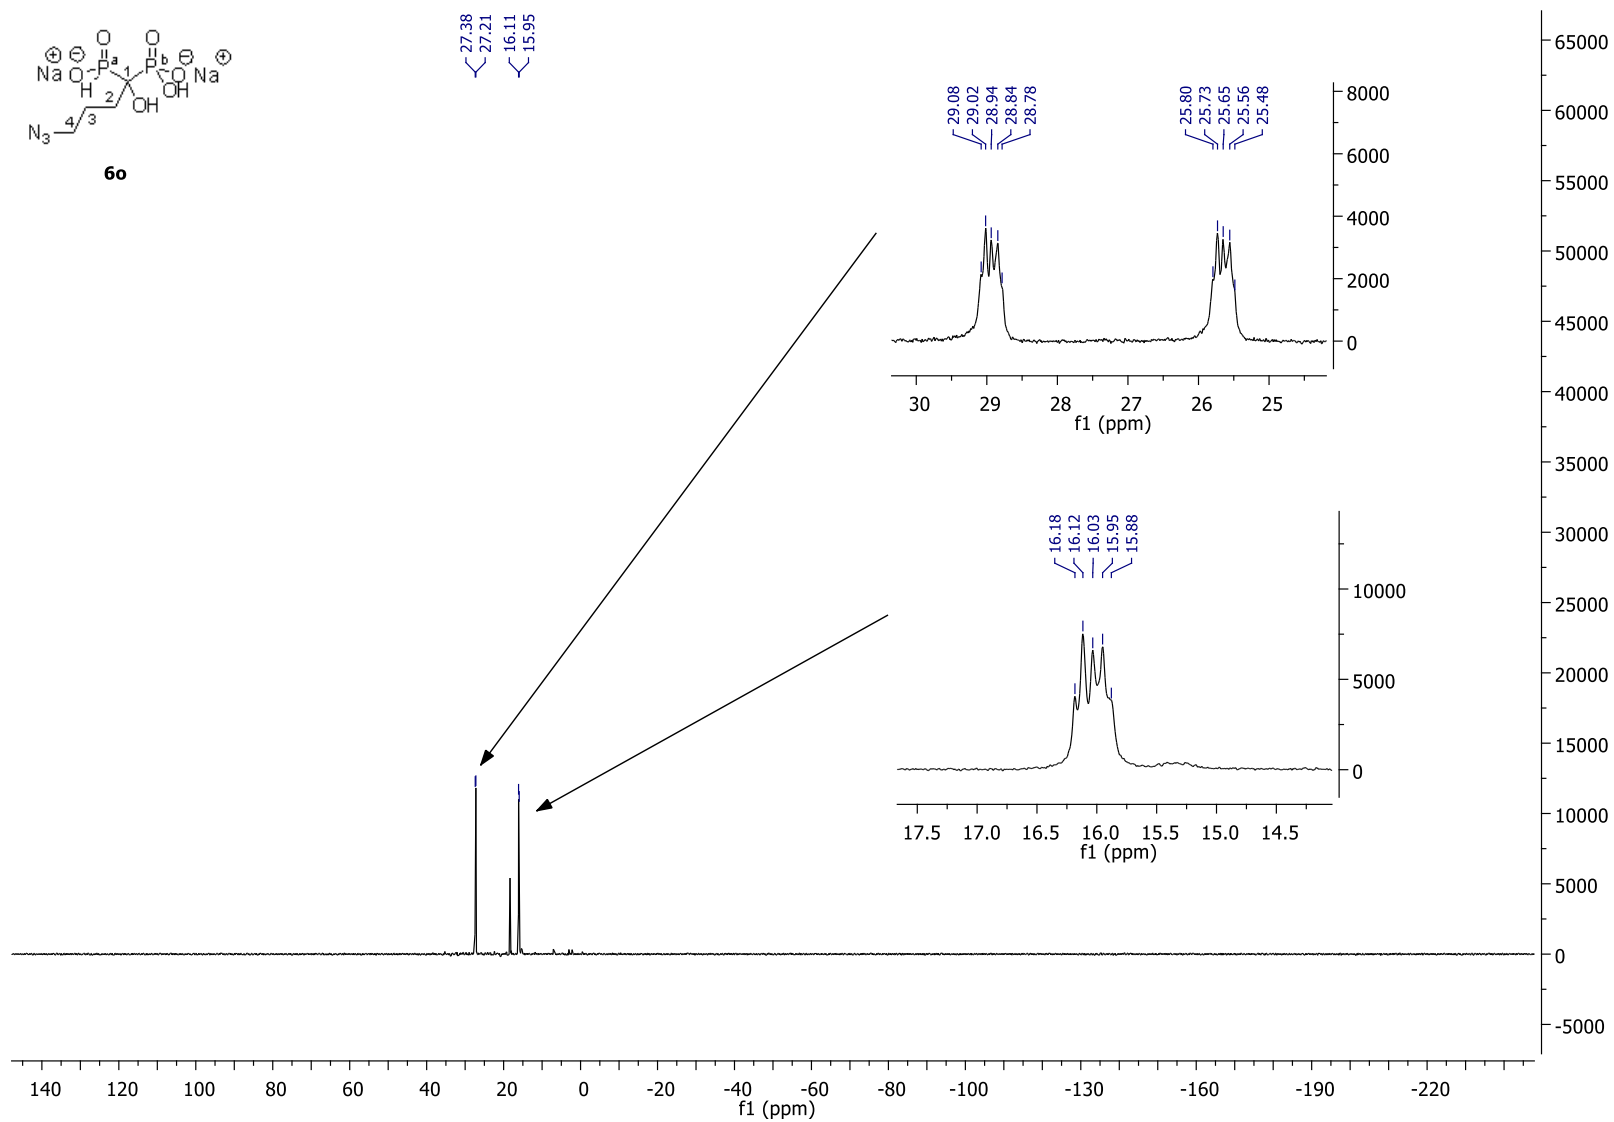

Figure S42:  $^{31}\text{P}\{^1\text{H}\}$  and  $^{31}\text{P}$  NMR (162 MHz,  $\text{D}_2\text{O}$ ) spectra of 1-hydroxy-1-(3-azidopropyl)methane-1,1-bis(*H*-phosphinylphosphonate) disodium salt **6o**

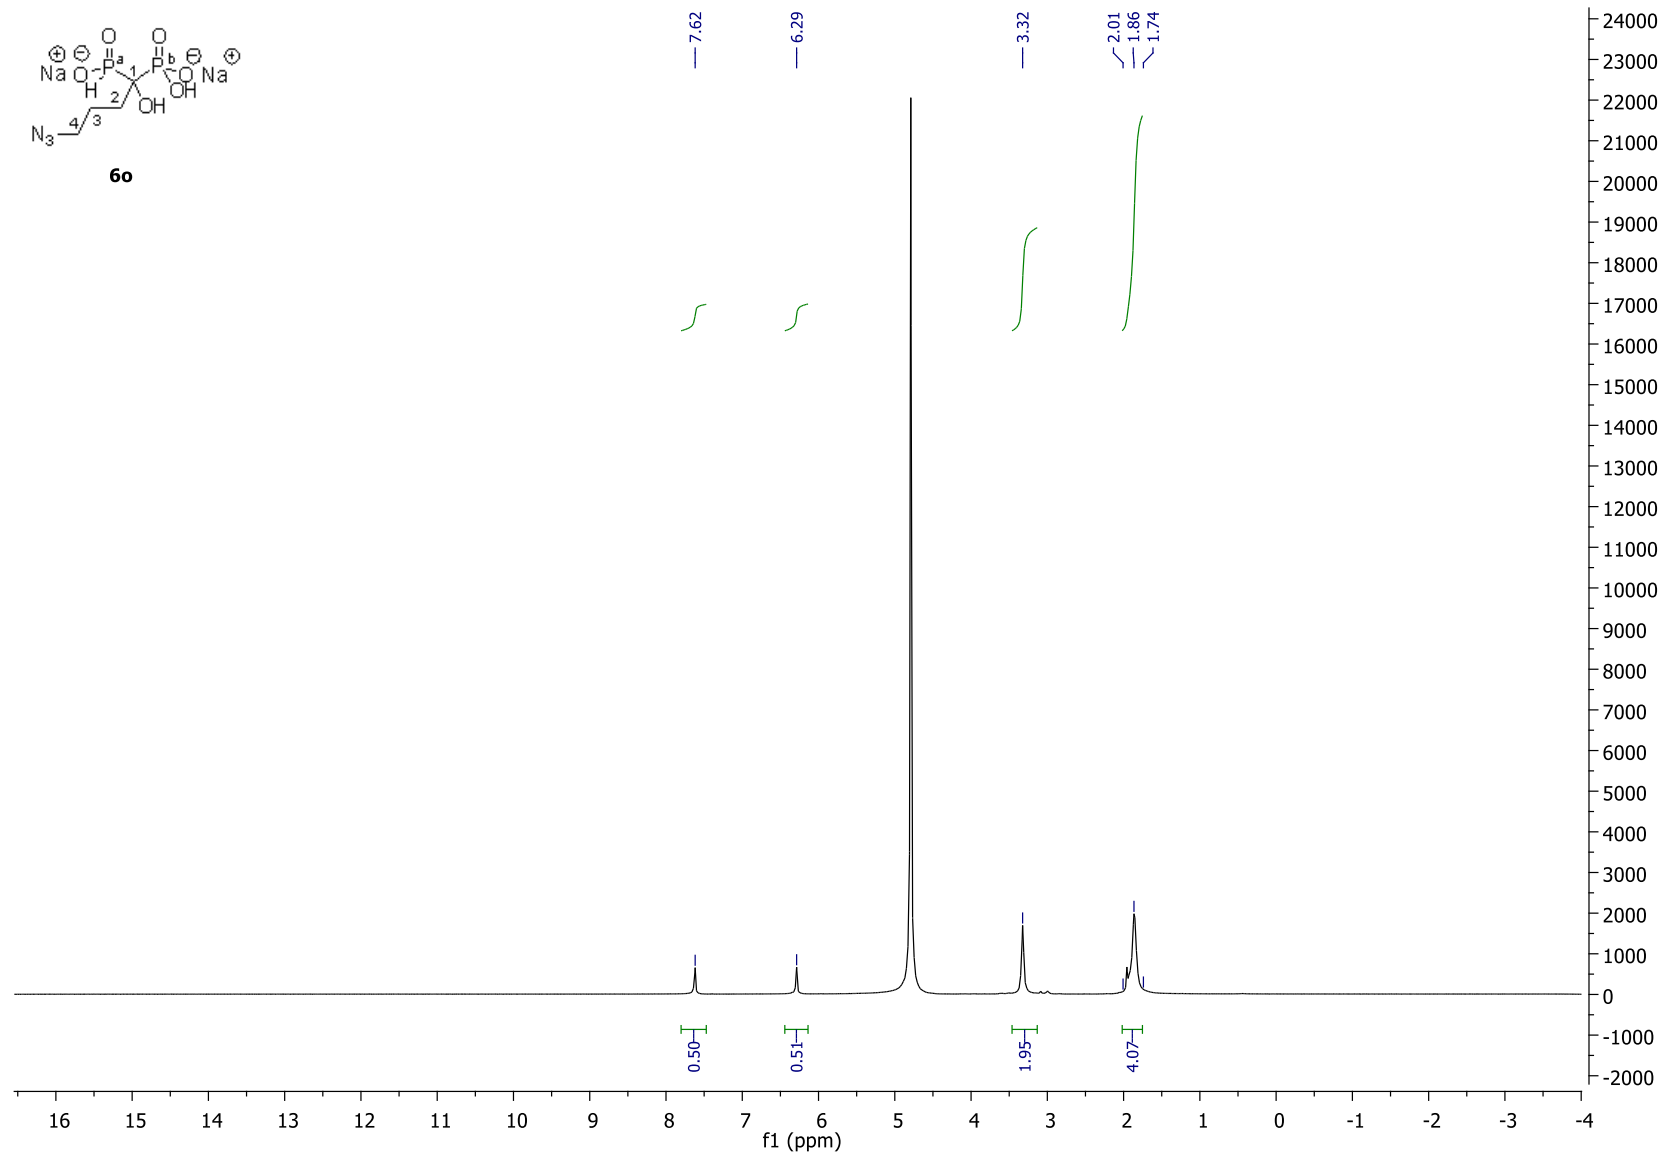

Figure S43: <sup>1</sup>H NMR (400 MHz, D<sub>2</sub>O) spectrum of 1-hydroxy-1-(3-azidopropyl)methane-1,1-bis(*H*-phosphinylphosphonate) disodium salt **60**

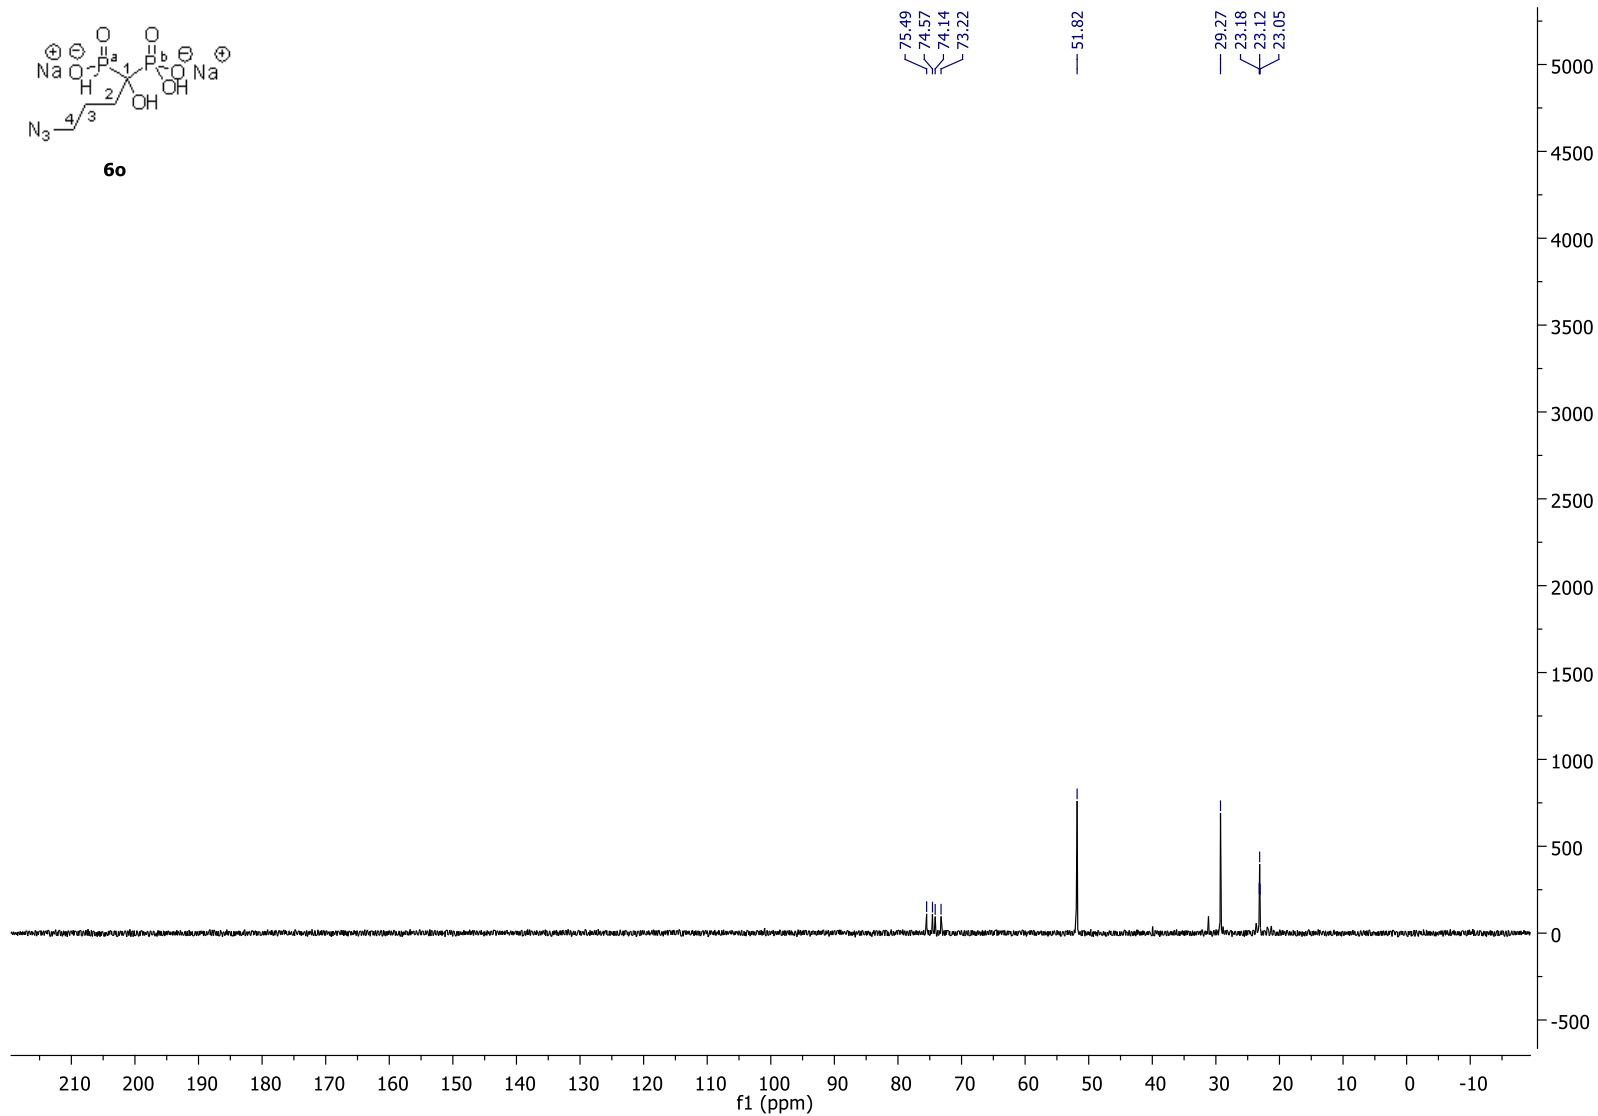

Figure S44: <sup>13</sup>C NMR (101 MHz, D<sub>2</sub>O) spectrum of 1-hydroxy-1-(3-azidopropyl)methane-1,1-bis(*H*-phosphinylphosphonate) disodium salt **60**

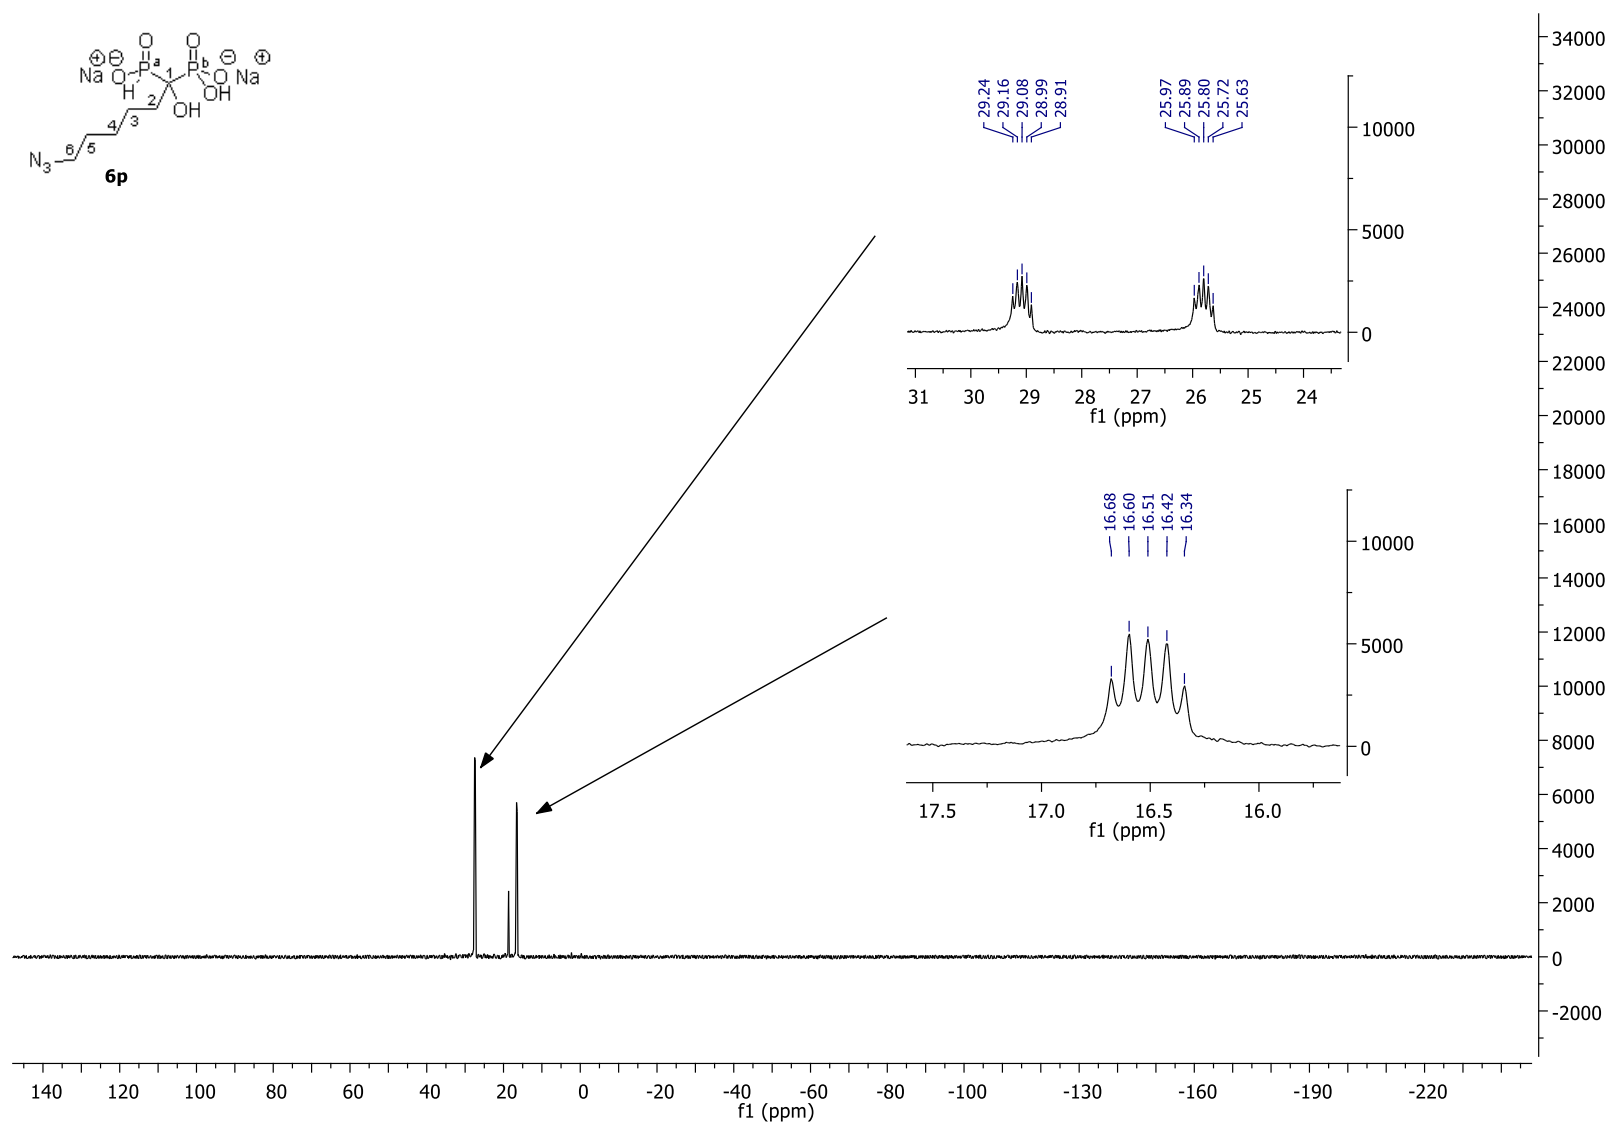

Figure S45: <sup>31</sup>P{<sup>1</sup>H} and <sup>31</sup>P NMR (162 MHz, D<sub>2</sub>O) spectra of 1-hydroxy-1-(5-azidopentyl)methane-1,1-bis(*H*-phosphinylphosphonate) disodium salt **6p**

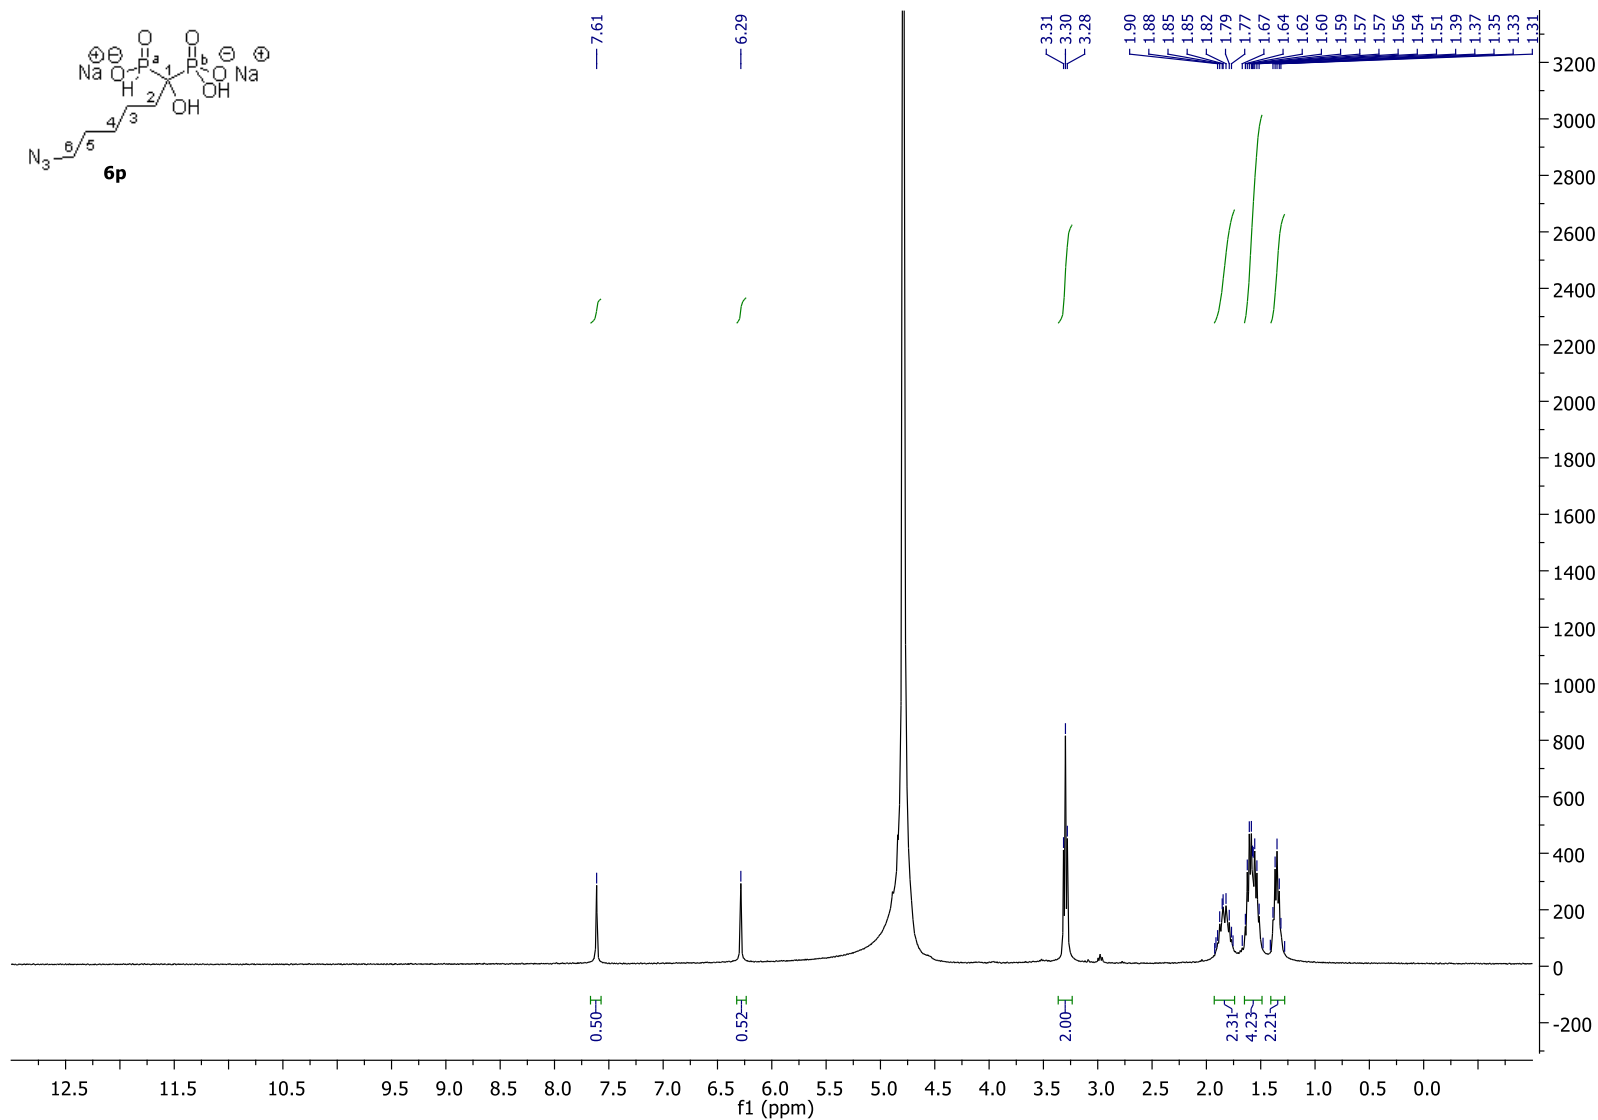

Figure S46: <sup>1</sup>H NMR (400 MHz, D<sub>2</sub>O) spectrum of 1-hydroxy-1-(5-azidopentyl)methane-1,1-bis(*H*-phosphinylphosphonate) disodium salt **6p**

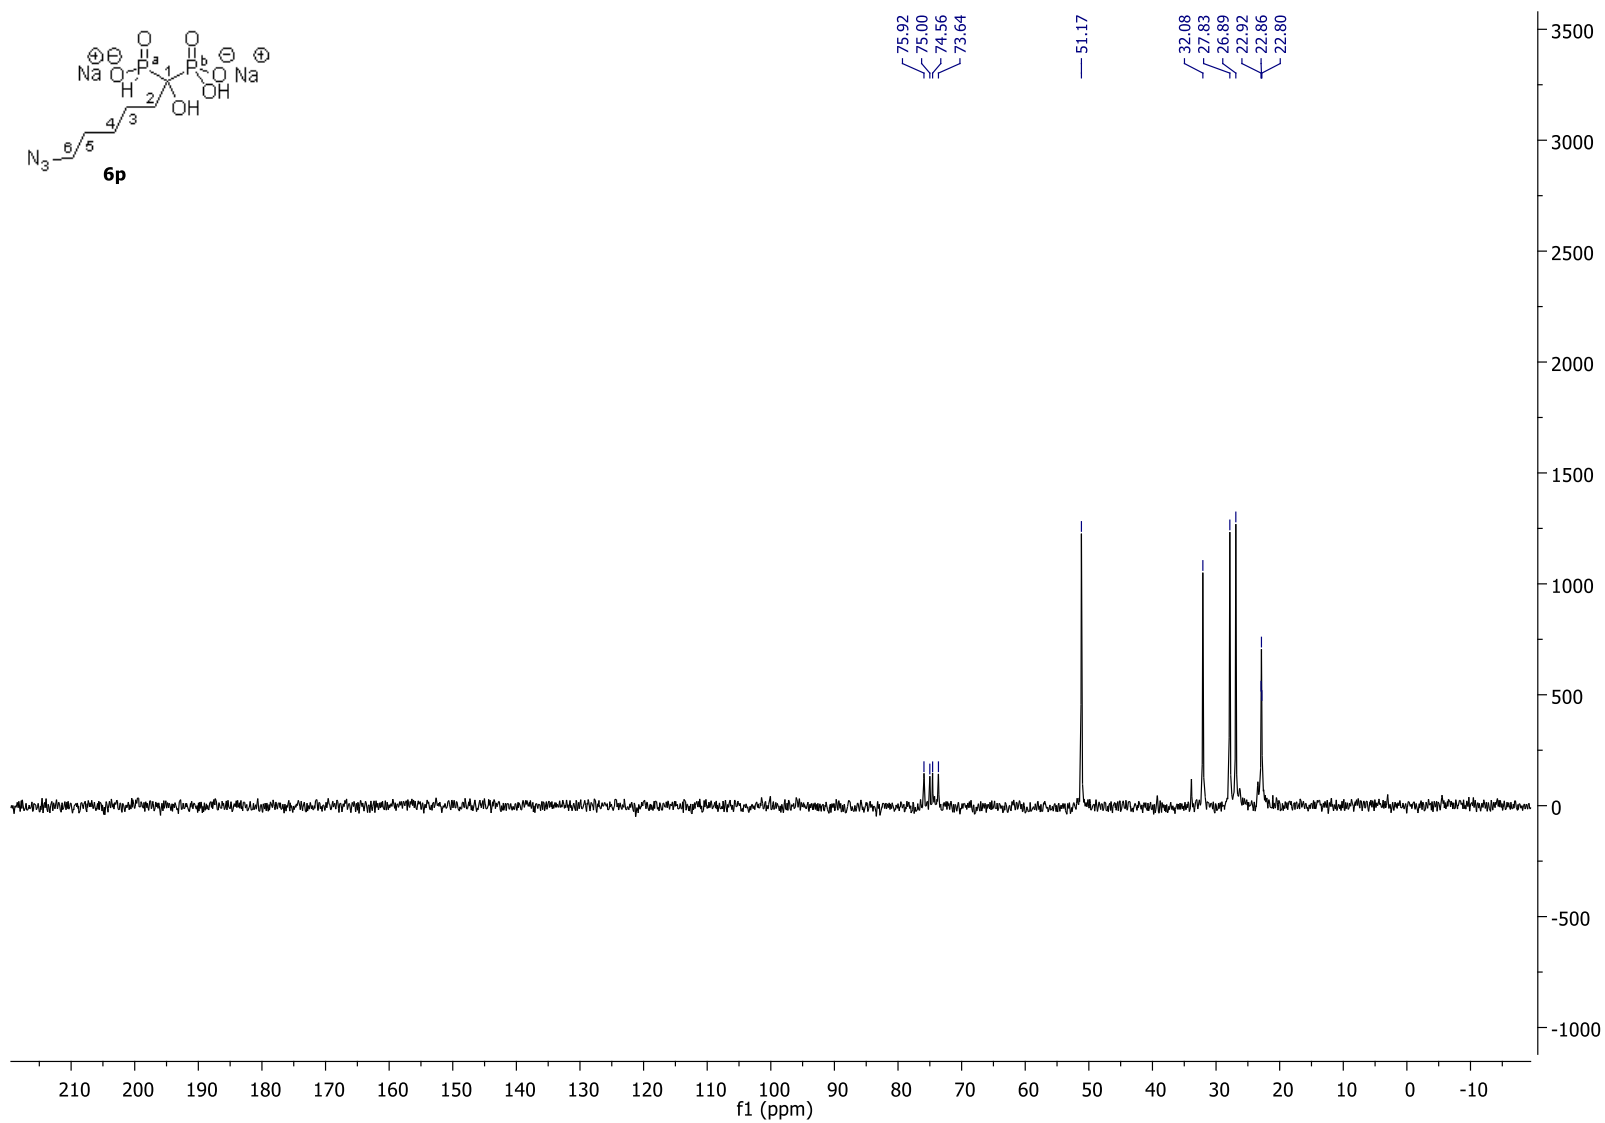

Figure S47 :  $^{13}\text{C}$  NMR (101 MHz,  $\text{D}_2\text{O}$ ) spectrum of 1-hydroxy-1-(5-azidopentyl)methane-1,1-bis(*H*-phosphinylphosphonate) disodium salt **6p**



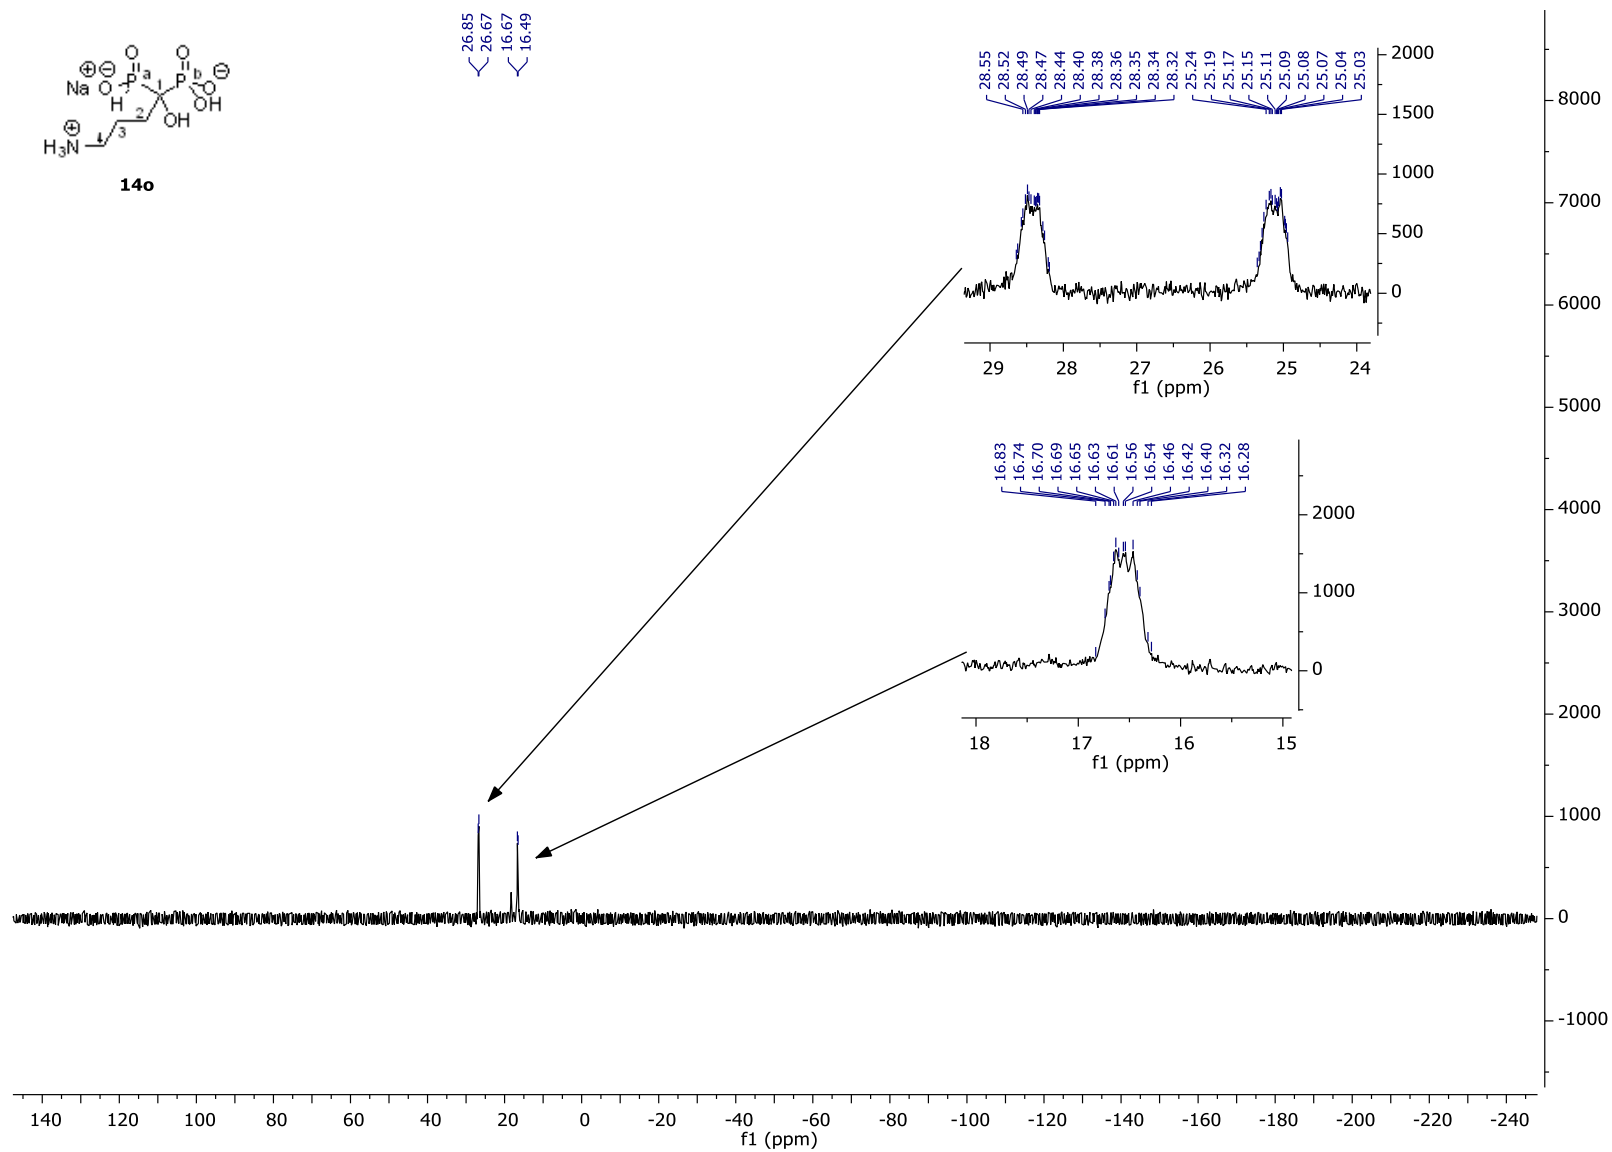

Figure S48: <sup>31</sup>P{<sup>1</sup>H} and <sup>31</sup>P NMR (162 MHz, D<sub>2</sub>O) spectra of 1-hydroxy-1-(3-aminopropyl)methane-1,1-bis(*H*-phosphinylphosphonate) disodium salt **14o**

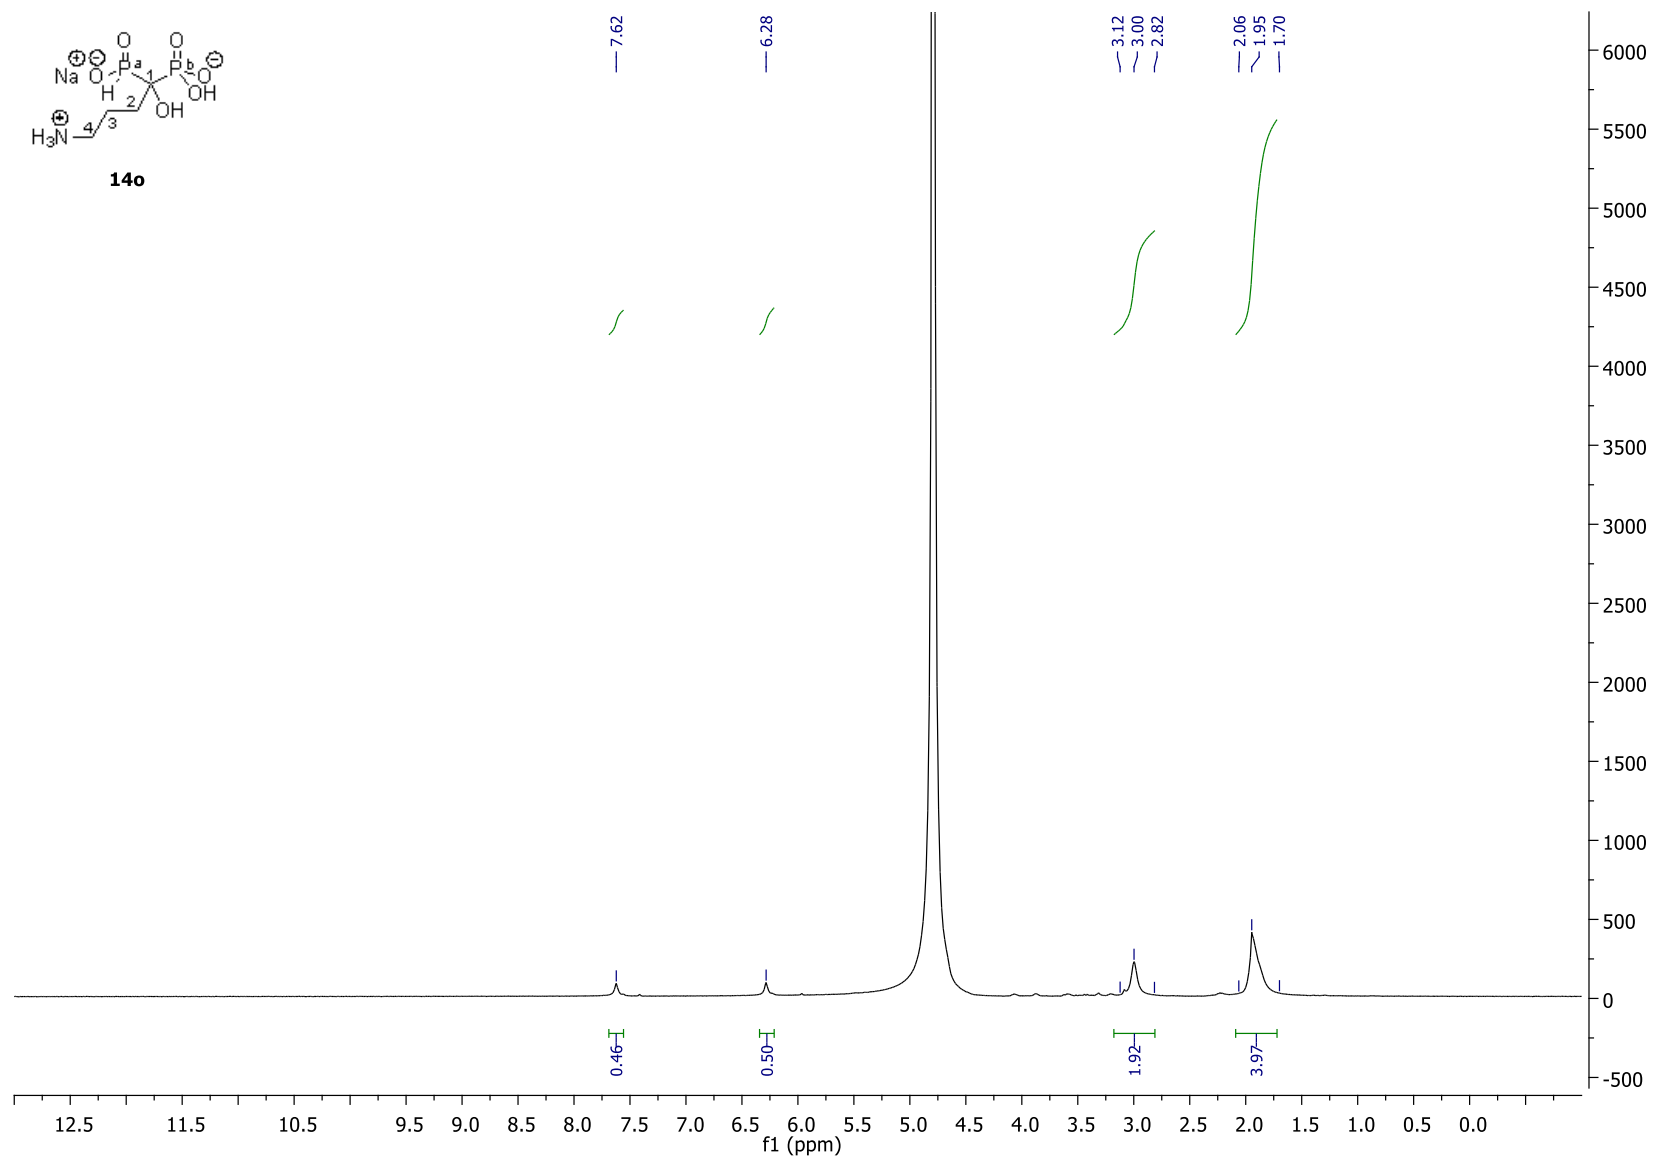

Figure S49: <sup>1</sup>H NMR (400 MHz, D<sub>2</sub>O) spectrum of 1-hydroxy-1-(3-aminopropyl)methane-1,1-bis(*H*-phosphinylphosphonate) disodium salt **14o**

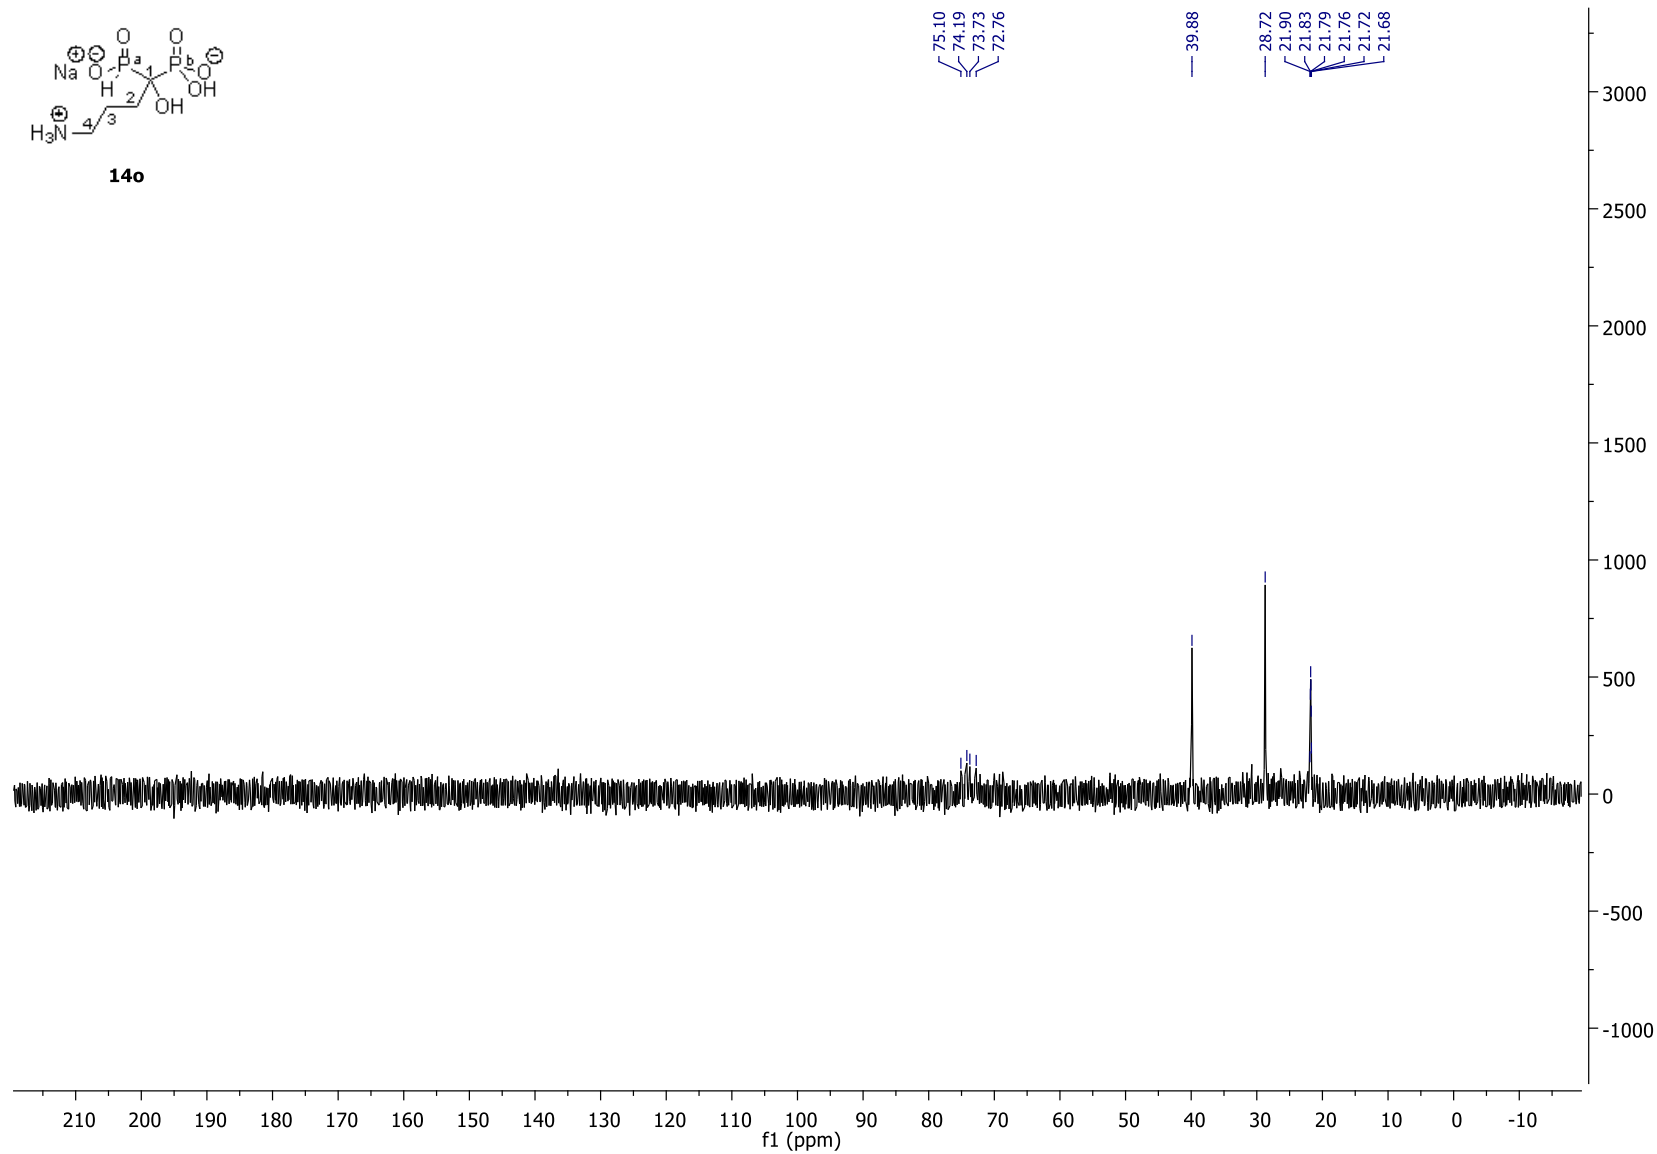

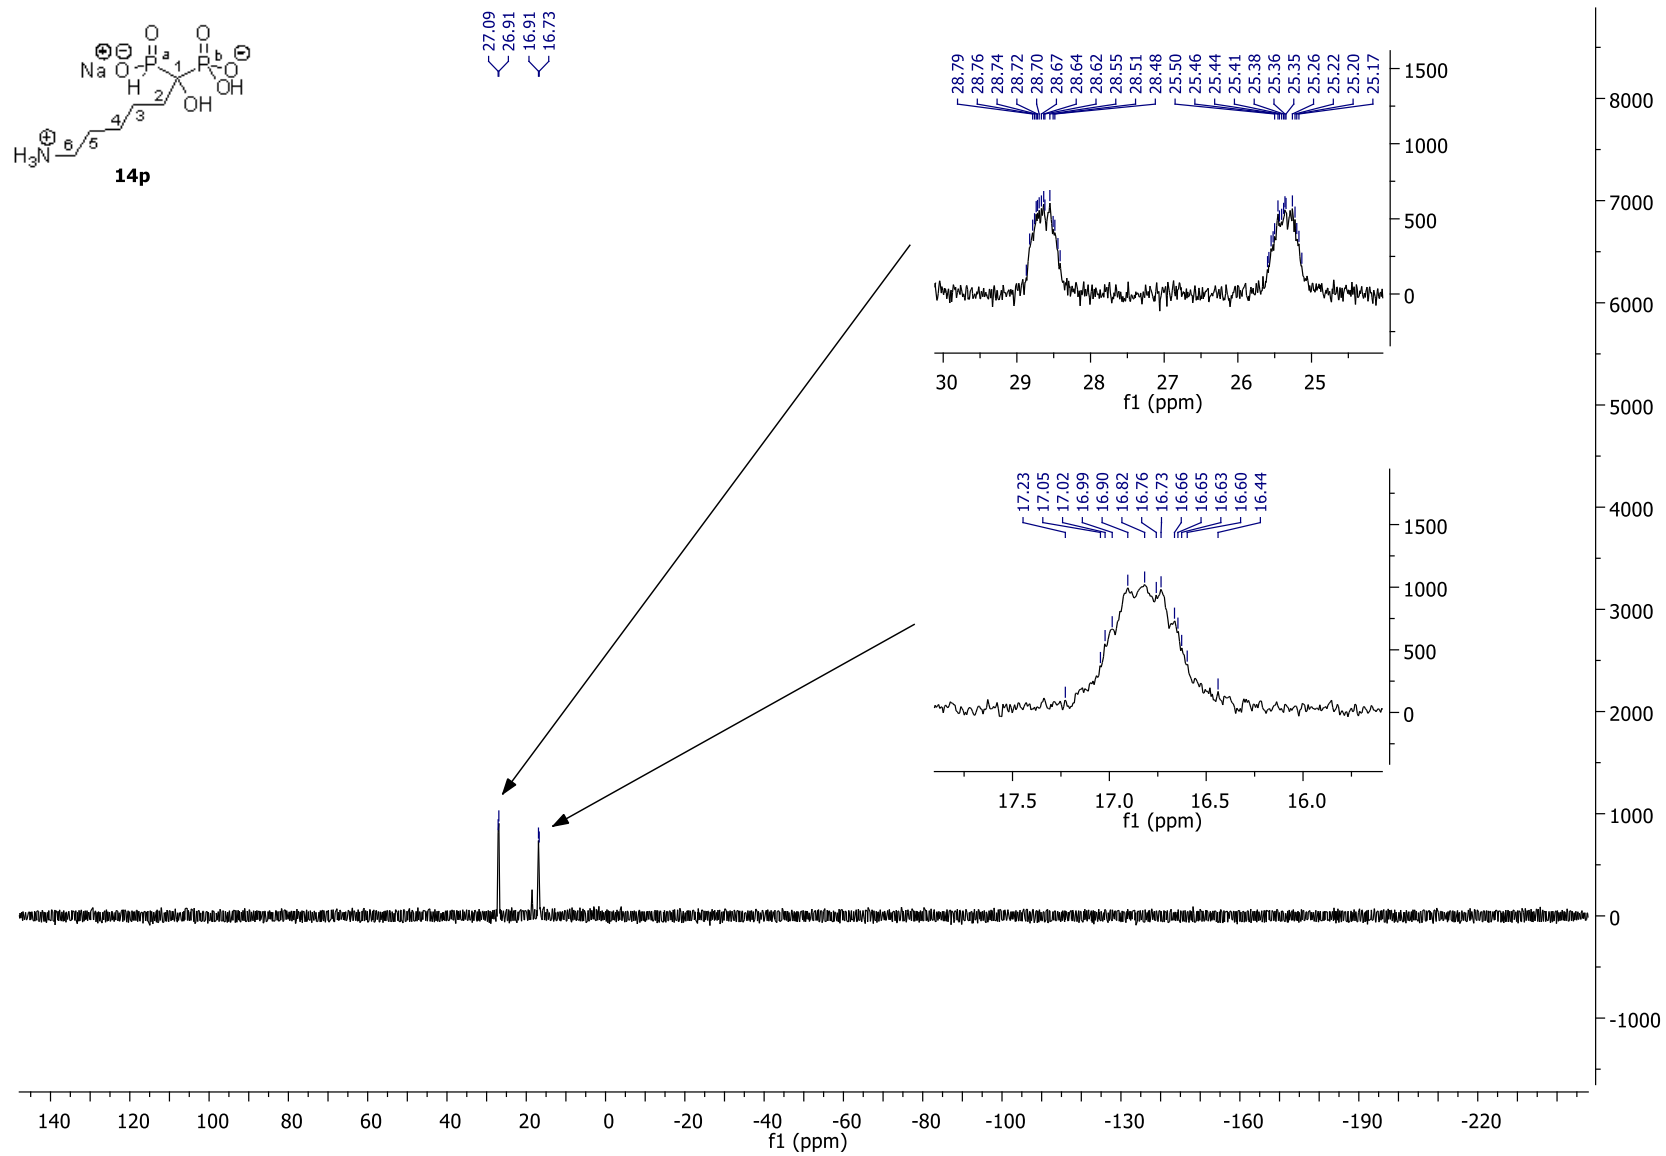

Figure S51:  $^{31}\text{P}\{^1\text{H}\}$  and  $^{31}\text{P}$  NMR (162 MHz,  $\text{D}_2\text{O}$ ) spectra of 1-hydroxy-1-(5-aminopentyl)methane-1,1-bis(*H*-phosphinylphosphonate) disodium salt **14p**

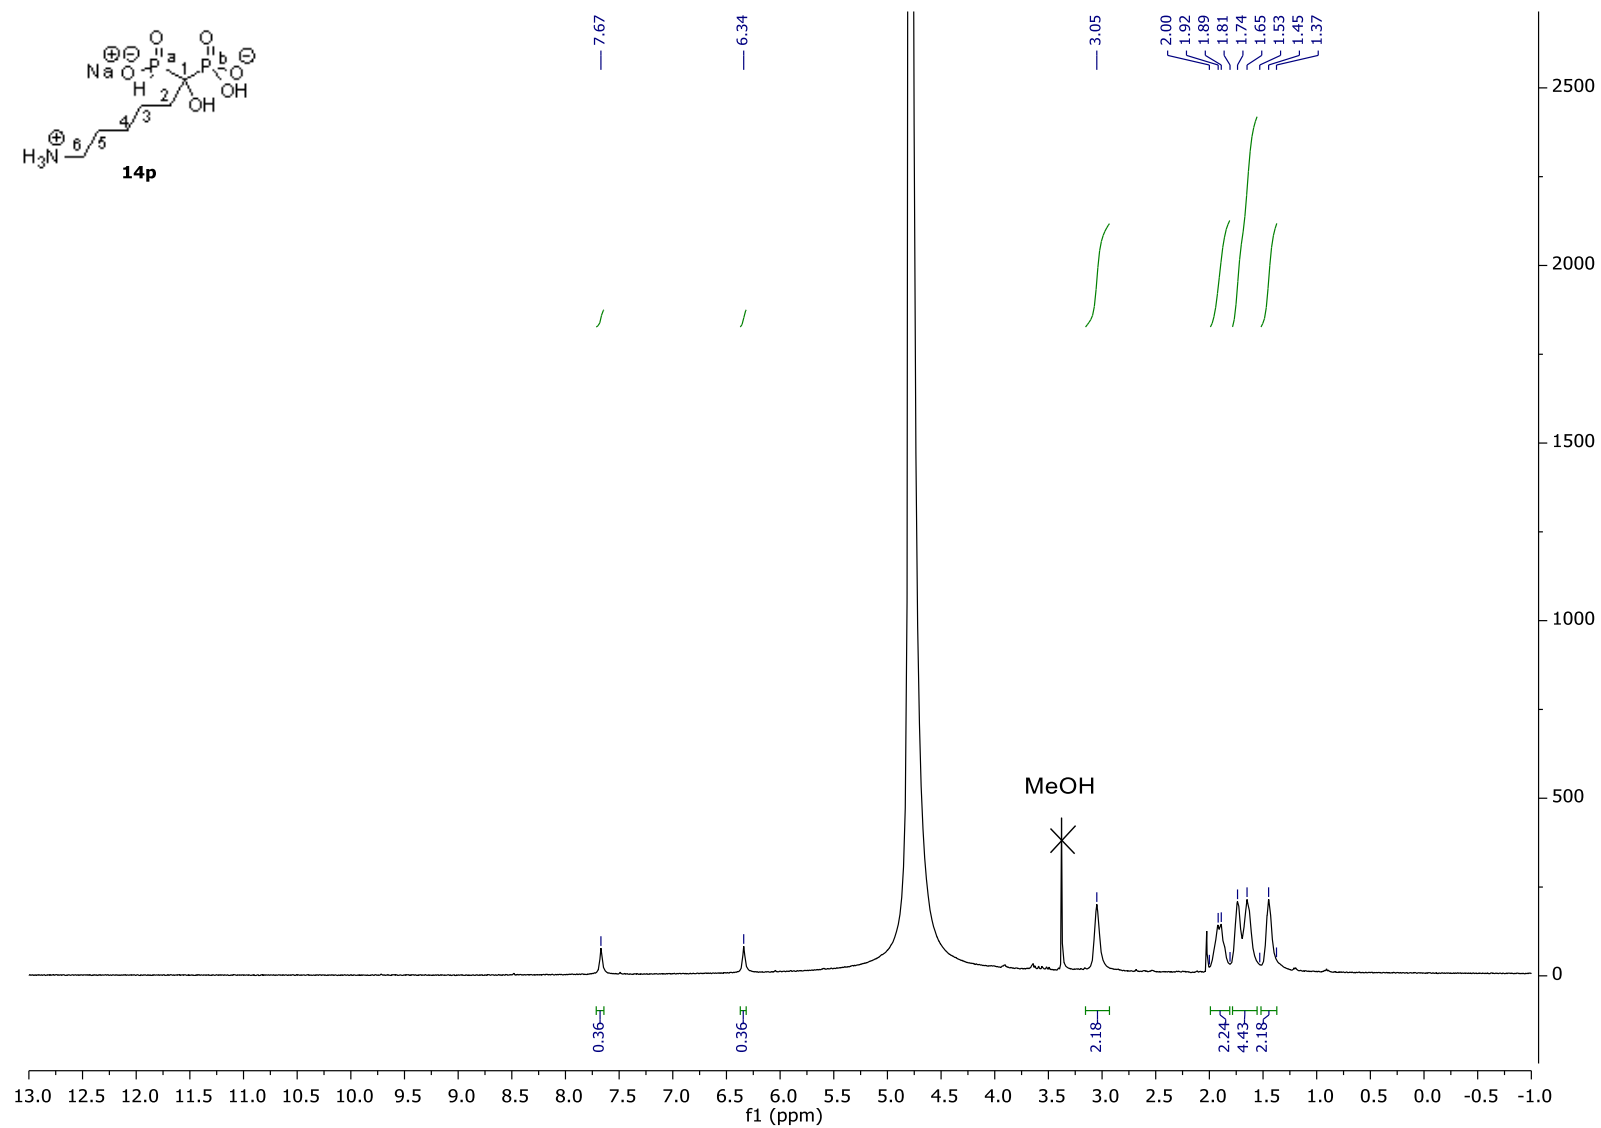

Figure S52:  $^1\text{H}$  NMR (400 MHz,  $\text{D}_2\text{O}$ ) spectrum of 1-hydroxy-1-(5-aminopentyl)methane-1,1-bis(*H*-phosphinylphosphonate) disodium salt **14p**

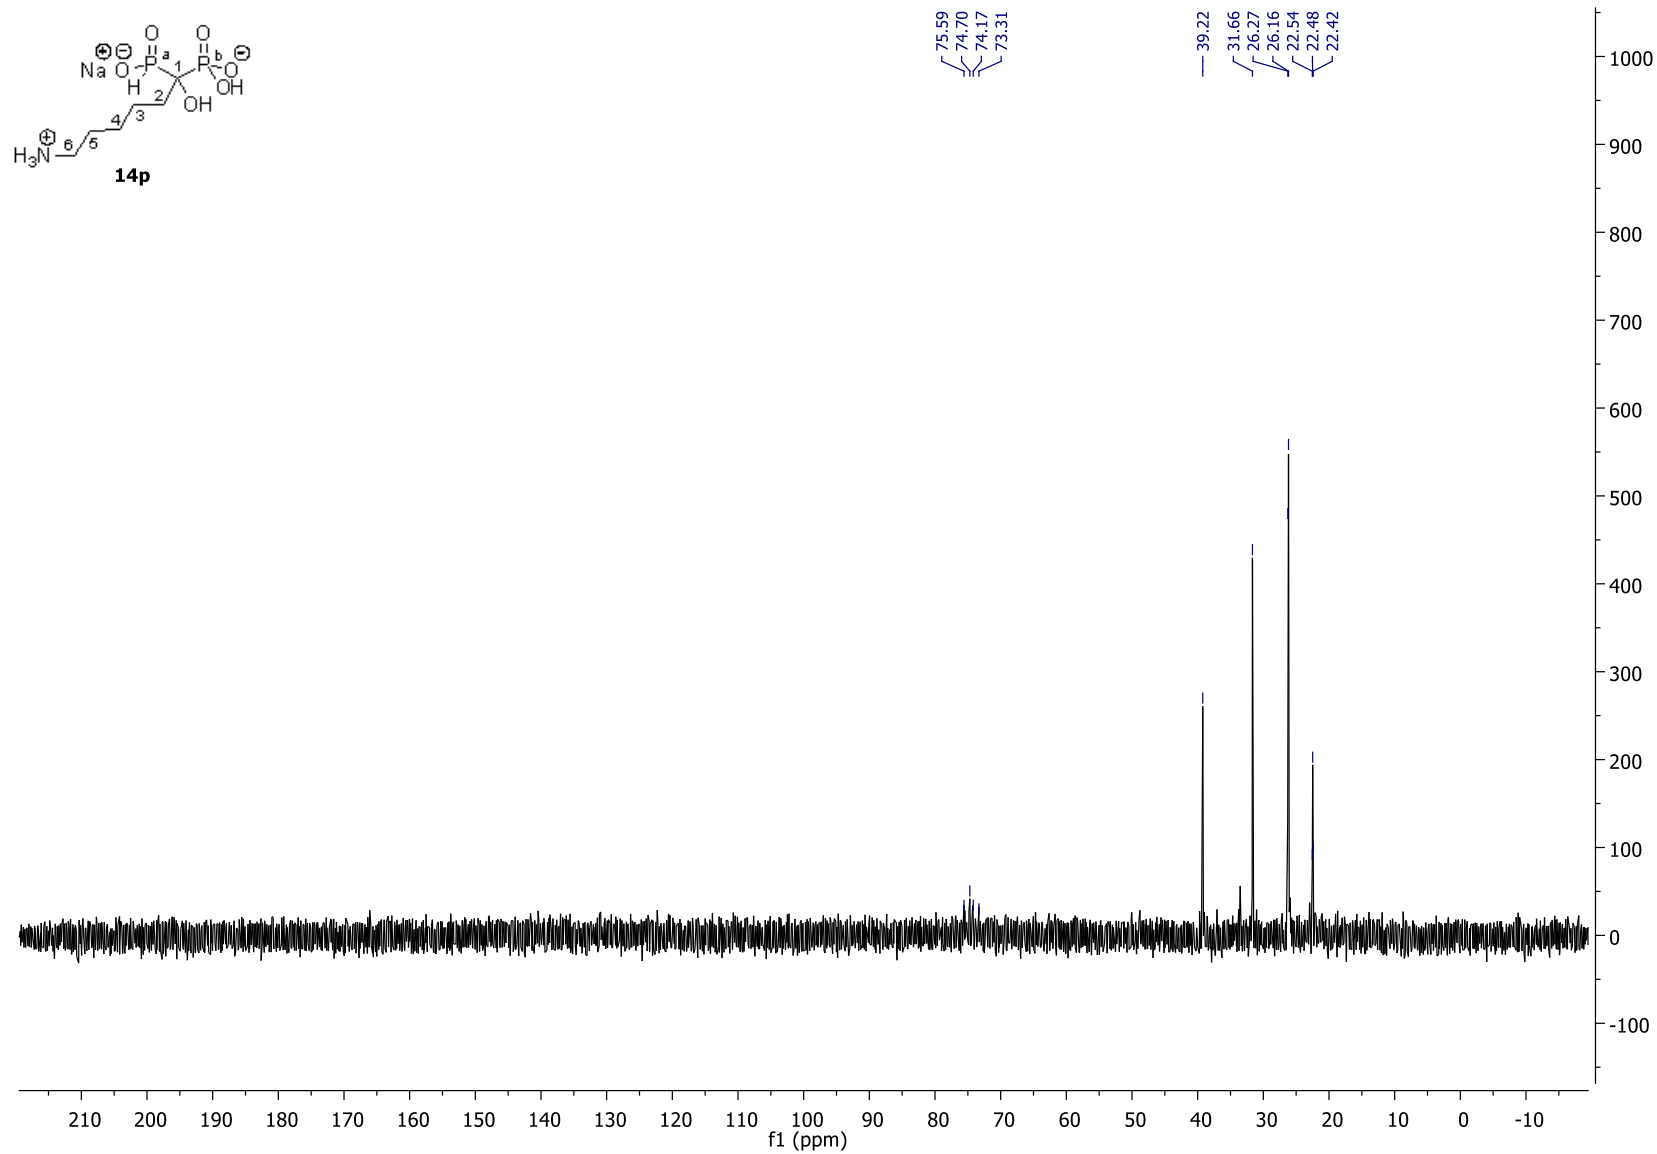

Supplement: s1 [file s1]
